1 **Identification of Hsp90 inhibitors as potential drugs for the treatment of TSC1/TSC2**  
2 **deficient cancer**

3

4 Evelyn M. Mrozek<sup>1</sup>, Vineeta Bajaj<sup>1</sup>, Yanan Guo<sup>1</sup>, Izabela A. Malinowska<sup>1</sup>, Jianming Zhang<sup>2</sup>,  
5 David J. Kwiatkowski<sup>1</sup>

6

7 **Affiliations**

8 <sup>1</sup> Cancer Genetics Lab, Pulmonary Medicine Division, Department of Medicine, Brigham and  
9 Women's Hospital and Harvard Medical School, Boston, Massachusetts, United States of  
10 America

11 <sup>2</sup> Department of Cancer Biology, Dana-Farber Cancer Institute, Department of Biological  
12 Chemistry and Molecular Pharmacology, Harvard Medical School, Boston, Massachusetts,  
13 United States of America

14

15 Correspondence to David J. Kwiatkowski and Evelyn M. Mrozek

16 E-mail: [dk@rics.bwh.harvard.edu](mailto:dk@rics.bwh.harvard.edu), [evelyn.mrozek@gmail.com](mailto:evelyn.mrozek@gmail.com)

17

18 **Conflict of interest statement:**

19 The authors have declared that no competing interests exist.

20        **Abstract**

21        Inactivating mutations in either *TSC1* or *TSC2* cause Tuberous Sclerosis Complex, an  
22        autosomal dominant disorder, characterized by multi-system tumor and hamartoma  
23        development. Mutation and loss of function of *TSC1* and/or *TSC2* also occur in a variety of  
24        sporadic cancers, and rapamycin and related drugs show highly variable treatment benefit in  
25        patients with such cancers. The TSC1 and TSC2 proteins function in a complex that inhibits  
26        mTORC1, a key regulator of cell growth, which acts to enhance anabolic biosynthetic  
27        pathways. In this study, we identified and validated five cancer cell lines with *TSC1* or *TSC2*  
28        mutations and performed a kinase inhibitor drug screen with 197 compounds. The five cell  
29        lines were sensitive to several mTOR inhibitors, and cell cycle kinase and HSP90 kinase  
30        inhibitors. The IC50 for Torin1 and INK128, both mTOR kinase inhibitors, was significantly  
31        increased in three TSC2 null cell lines in which TSC2 expression was restored. Rapamycin  
32        was significantly more effective than either INK128 or ganetespib (an HSP90 inhibitor) in  
33        reducing the growth of TSC2 null SNU-398 cells in a xenograft model. Combination  
34        ganetespib-rapamycin showed no significant enhancement of growth suppression over  
35        rapamycin. Hence, although HSP90 inhibitors show strong inhibition of TSC1/TSC2 null cell  
36        line growth in vitro, ganetespib showed little benefit at standard dosage in vivo. In contrast,  
37        rapamycin which showed very modest growth inhibition in vitro was the best agent for in  
38        vivo treatment, but did not cause tumor regression, only growth delay.

39

## 40           **Introduction**

41           Tuberous sclerosis complex (TSC) is an autosomal dominant neurocutaneous disorder,  
42           which is caused by inactivating mutation either in *TSC1* or *TSC2*. Mutations in either gene  
43           cause the same phenotype, although mutations in *TSC1* are associated with milder clinical  
44           severity in multiple respects (1, 2). There are multiple highly specific clinical features of TSC  
45           including cortical tubers, subependymal nodules, cardiac rhabdomyoma, kidney  
46           angiomyolipoma, pulmonary lymphangiomyomatosis, facial and unguis angiofibromas  
47           (1-4). Although tumors in TSC are histologically benign, they cause life-threatening issues in  
48           10-15% of patients if left untreated (1, 4).

49           Inactivating *TSC1* and *TSC2* mutations also occur rarely in multiple cancer types.  
50           Cancers with higher rates of *TSC1/TSC2* mutation include: urothelial carcinoma of the  
51           bladder and upper tract, with 6-10% incidence of *TSC1* mutations (5) and perivascular  
52           epithelioid cell tumors (PEComa) with up to 50% frequency of *TSC2* and *TSC1* mutations (6).  
53           The mechanistic target of rapamycin (mTOR) is a large (2,549 amino acid) protein kinase that  
54           occurs in cells in either of two complexes, mTOR complex 1 (mTORC1) and mTORC2, that  
55           have overlapping as well as distinct components. They have different roles, and mTORC1  
56           regulates cell growth in part by enhancing anabolic biosynthetic pathways (7, 8).  
57           *TSC1* encodes TSC1/hamartin, *TSC2* encodes TSC2/tuberin, and with TBC1D7 the three  
58           proteins form the TSC protein complex (9). This TSC protein complex functions to enhance  
59           conversion of Rheb-GTP to Rheb-GDP, through the GAP domain of TSC2, which serves to  
60           inactivate the mTORC1 kinase (7, 8). Loss of either TSC1 or TSC2 inactivates the TSC  
61           protein complex, leading to constitutively active mTORC1 (10). mTORC1 phosphorylates the  
62           translational regulators S6 kinases (S6K1 and S6K2) and eukaryotic translation initiation  
63           factor 4E binding protein 1 (4E-BP1), as well as many other downstream proteins (11, 12).  
64           Both S6K activation and inactivation of 4E-BP1 by phosphorylation are important  
65           downstream effectors of mTORC1 activation (7, 8, 13).

66 Rapamycin, also called Sirolimus, has antiproliferative and immunosuppressive  
67 activities. Rapamycin binds to FK-506-binding protein (FKBP12) with high affinity, and  
68 rapamycin-FKBP12 binds to mTORC1 to inhibit its kinase activity in an allosteric manner  
69 (14). Rapamycin treatment has highly variable effects on mTORC1 kinase activity, as it  
70 completely inhibits phosphorylation of S6K, while having relatively little effect on mTORC1  
71 phosphorylation of 4E-BP1 (11). Rapamycin-FKBP12 does not bind to mTORC2 or affect its  
72 function directly (15).

73 Clinically, rapamycin is FDA-approved for both prevention of allograft rejection, and  
74 for treatment of lymphangiomyomatosis, Drugs closely related to rapamycin are termed  
75 rapalogs, and include temsirolimus, everolimus, and deforolimus. Rapalogs have very similar  
76 if not identical activity in vivo (16).

77 Heat shock protein 90 (HSP90) is an ATP-dependent molecular chaperone, which is  
78 highly expressed and helps to maintain proteostasis. HSP90 regulates the proper  
79 conformation, function and activity of multiple proteins (about 200 'client' proteins) by  
80 protecting them from proteasome-mediated degradation. HSP90 expression is upregulated in  
81 many forms of cancer, and is thought to promote/enable malignant transformation, tumor  
82 progression, invasion, metastasis, and/or angiogenesis (17, 18).

83 HSP90 inhibition results in proteasome-mediated degradation of protein substrates  
84 (19-22). Luminespib (NVP-AUY922) and ganetespib are HSP90 inhibitors, which have been  
85 studied in human cancer clinical trials, but are not FDA-approved. They are known to have  
86 anti-proliferative, anti-invasive, and pro-apoptotic effects in glioblastomas (23). Ganetespib is  
87 reported to have a good safety profile, with adverse effects like fatigue, diarrhea, nausea,  
88 vomiting elevated amylase levels, asthenia, anorexia, and hypersensitivity reactions (24), but  
89 no liver, ocular, or cardiac toxicities like previous HSP90 inhibitors. So far, no HSP90  
90 inhibitor has been approved for cancer therapy (21).

---

## 91 **Materials and methods**

### 92 **Cell lines and cell culture**

93 All cell lines were obtained from the Broad Institute of Harvard and MIT. PEER  
94 (T-cell acute lymphoblastic leukemia), SNU-878 (hepatocellular carcinoma), SNU-886  
95 (hepatocellular carcinoma), CW-2 (large intestine adenocarcinoma), 23132/87 (stomach  
96 adenocarcinoma), MEF-319 (endometrium adenosquamous carcinoma), KM12 (large  
97 intestine adenocarcinoma), HEC-151 (endometrium adenocarcinoma), DV-90 (lung  
98 adenocarcinoma), OVK18 (ovarian endometrioid carcinoma) and HCC-95 (lung squamous  
99 cell carcinoma) were cultured in RPMI 1650 with 10% fetal bovine serum (FBS); CAL-72  
100 (osteosarcoma) and NCI-H1651 (lung adenocarcinoma) in DMEM/F-12 with 10% FBS;  
101 MGH-U1 (urinary bladder carcinoma) and HEK-293 (embryonic kidney cells) in DMEM  
102 with 10% FBS; and SNU-398 (hepatocellular carcinoma) in RPMI 1650 GlutaMAX  
103 medium with 10% FBS. All media was supplemented with 1% penicillin- streptomycin-  
104 amphotericin B (Corning). All cell culture was done in a 37 °C humidified incubator in 5%  
105 CO<sub>2</sub>. For serum starvation, cells were incubated with standard medium without FBS for 24  
106 hours. For serum stimulation, FBS was added back with a final concentration of 10% for  
107 30 minutes.

### 108 **DNA isolation and sequencing**

109 For DNA purification Genra Puregene Tissue Kit was used (Qiagen).  
110 Oligonucleotide primers for sequencing mutated regions of *TSC1* and *TSC2* on the cell  
111 lines, where mutations were reported, were designed with Primer3 (25). FastStart PCR Kit  
112 (Sigma-Aldrich) was used for PCR, and products were purified using AMPure XP  
113 (Beckman Coulter) beads. PCR products were sequenced by Sanger methodology at the  
114 High Throughput Sequencing Service, Brigham and Women's Hospital.

### 115 **Multiplex Ligation Dependent Probe Amplification (MLPA) assays**

116 MLPA was performed by standard methods (MRC-Holland, Amsterdam, The Netherlands)  
117 using a probe set that covered five tumor suppressor genes: *LKBI*, *PTEN*, *CDKN2A*, *TSC1*,  
118 and *TSC2*. 57 of 425 cancer cell lines showed some degree of reduction in signal for one  
119 more *TSC1* or *TSC2* probes, and were subject repeat analysis using probe sets specific for  
120 either *TSC1* or *TSC2*, the SALSA MLPA probemix P124 TSC1, and the SALSA MLPA  
121 probemix P046-D1 TSC2, respectively. Amplification products were run on an ABI  
122 3100Genetic Analyzer (ABI, USA) and electrophoregrams were generated. Peak heights  
123 were loaded into a standard Excel file to determine copy number for each probe and  
124 sample pair.

### 125 **Immunoblotting**

126 Cells were lysed in cell lysis buffer (Cell Signaling Technology) with added  
127 protease and phosphatase inhibitor cocktails (Sigma-Aldrich). The protein concentration  
128 was determined using a Bradford assay (Boston BioProducts). For immunoblotting,  
129 proteins were loaded in 4–12% gradient NuPAGE bis-tris gels (Life Technologies) or  
130 home-made 15% polyacrylamide gels, separated by SDS–PAGE and transferred to PVDF  
131 membranes. For detection the following primary antibodies were used: mTOR (2972, Cell  
132 Signaling Technology), TSC2, C-20 (sc-893, Santa Cruz Biotechnology), TSC1 (4906S,  
133 Cell Signaling Technology), pAKT-Ser473 (4060x, Cell Signaling Technology), AKT1, C-  
134 20 (J2810, Santa Cruz Biotechnology), pS6K-Thr389 (9234S, Santa Cruz Biotechnology),  
135 S6 kinase, C-18 (D0506, Santa Cruz Biotechnology), pS6-Ser235/236 (4857S, Cell  
136 Signaling Technology), pS6-Ser240/244 (2215L, Cell Signaling Technology), GAPDH  
137 (GR9686I, Abcam), 4E-BP1 (9452L, Cell Signaling Technology), p4E-BP1-Ser65,  
138 (9451S, Cell Signaling Technology), p4E-BP1-Thr37/T46 (2855, Cell Signaling  
139 Technology), peIF2 $\alpha$ -Ser51 (9721S, Cell Signaling Technology), BiP (3183S, Cell  
140 Signaling Technology), cleaved caspase-3 (9664S, Cell Signaling Technology) and  $\beta$ -  
141 Actin (4970, Cell Signaling Technology).

---

142 Secondary antibodies were anti-mouse, anti-rabbit, and anti-goat (Santa Cruz  
143 Biotechnology) conjugated to horseradish peroxidase, and were used at 1:3000 dilution.  
144 Immunoreactive bands were detected by chemiluminescence (super signal west pico and  
145 femto chemiluminescent, Thermo Fisher Scientific) using the G:Box:iChemiXT imager  
146 (Syngene).

#### 147 **Kinase inhibitor library screen and IC<sub>50</sub> determination**

148 The cell lines SNU-878, SNU-886, SNU-398, CAL-72, and PEER were screened for  
149 kinase inhibitors using a kinase inhibitor-focused library (LINCS). The LINCS library  
150 contained 197 kinase inhibitors, from a diverse ATP competitive kinase inhibitor set. These  
151 kinase inhibitors were shown to be relatively potent and selective towards a narrow range of  
152 targets. 2000 adherent cells and 3000 suspension cells were plated with 50  $\mu$ L medium in  
153 each well of a 384 microplate. Drugs with a concentration of 660 nM were added the same  
154 day. After 48 hours cellular proliferation was determined using CellTiter-Glo (Promega).  
155 Drugs identified as having a significant effect on this screen were tested in greater detail.  
156 2000 adherent or 4000 suspension cells were plated on day 0 on a 96 well plate with 100  $\mu$ L  
157 medium, except on the marginal wells. Drugs were added on day 1, which were serially  
158 diluted three-fold from 10  $\mu$ M to 1.5 nM. Cell viability was determined after 72 hours of  
159 treatment by adding 20  $\mu$ L CellTiter-Glo. Cell viability was determined using XLfit4.0  
160 software. IC<sub>50</sub> values were calculated using Graphpad Prism as the drug concentration that  
161 reduced cell viability by 50% compared to untreated cells. Rapamycin was purchased from  
162 LC laboratories and ganetespib from Synta Pharmaceuticals.

#### 163 **TSC2 add-back**

164 To add back TSC2 to cells lacking a functional TSC2 expression (SNU-878, SNU-  
165 886, and SNU-398 cells), pMSCV and pMSCV-TSC2 (containing the TSC2 cDNA)  
166 plasmids were used. HEK293T cells were transfected with pCL Amphi retrovirus

167 packaging vector (Imgenex) and pMSCV-EV (empty vector) or pMSCV-TSC2, with  
168 selection to generate retrovirus. Retrovirus was then added to each of the SNU cell lines.  
169 Neomycin was used as a selection antibiotic.

### 170 **Mouse xenograft studies**

171 All procedures were carried out according to the Guide for the Humane Use and  
172 Care of Laboratory Animals, and the experiments were approved by the Animal Care and  
173 Use Committee of the Children's Hospital, Boston, MA, USA (protocol reference number:  
174 1589).

175 Immunodeficient strain CB17SC-M scid (C.B-*Igh-I<sup>b</sup>/IcrTac-Prkdc<sup>scid</sup>*) mice were  
176 used to generate xenograft tumors. Mice were purchased at the age of 3-4 weeks from  
177 Taconic, Germantown, NY, USA. Mice were 6 to 8 weeks old and their weight was  
178 between 17 to 25 g when  $3 \times 10^6$  tumor cells of the cancer cell line SNU-398 in 100  $\mu$ L  
179 medium mixed with 100  $\mu$ L matrigel were injected subcutaneously in both back flank  
180 regions.

181 Xenograft tumor nodules were followed 3x weekly, and when they reached a  
182 minimum diameter of 4mm (14-30 days after injection), drug treatments were initiated.  
183 Mice were treated either with INK128 (Intellikine Inc.), rapamycin (LC laboratories), or  
184 ganetespib (Synta Pharmaceuticals); or vehicle; or a combination of ganetespib and  
185 INK128, or ganetespib and rapamycin. Bodyweight was measured at least 3 times a week.  
186 Tumor size was measured with an electronic digital caliper in 2 dimensions (volume=  
187  $a^2 \times b / 2$ , with a being the greater diameter). For drug administration, INK128 powder was  
188 dissolved daily in vehicle (5% NMP, 15% polyvinylpyrrolidone K30, and 80% water); and  
189 was administered by gavage 5 days/week at a dose of 1mg/kg and a volume of 100  $\mu$ L.  
190 Rapamycin was prepared as a 20 mg/mL stock solution using 100% ethanol, and was  
191 mixed daily with sterile vehicle (0.25% PEG-200, 0.25% Tween-80, and water to achieve a  
192 volume of 200  $\mu$ L for injection. Rapamycin was administered by intraperitoneal injection 3



---

193 times/week in a dose of 3 mg/kg. Ganetespib powder was dissolved in DMSO to  
194 concentration 50 mg/mL, with heating to 55 °C. Ganetespib stock solution was diluted  
195 1:10 in 20% cremophor RH40 (CrRH40)/80% dextrose (D5W). Ganetespib was  
196 administered by tail vein injection once/week in a dose of 50 mg/kg. Control mice received  
197 vehicle treatment for one of these three drugs.

## 198 **Immunohistochemistry (IHC)**

199 Xenograft tumors were harvested 6 hours after last treatment with rapamycin or  
200 INK128, and 24 hours after last treatment with ganetespib. Resected tumors were used for  
201 immunoblotting and/or used for immunohistochemistry (IHC). For IHC tumors were fixed  
202 with 10% formalin overnight and stored in 70% ethanol solution until paraffin embedding.  
203 Paraffin-embedded sections, both unstained and stained (hematoxylin and eosin stain),  
204 were prepared by the Rodent Histopathology Core, Harvard Medical School.

205 For IHC, slides were rinsed with a series of xylene, ethanol, 95% ethanol, 80% ethanol,  
206 and PBS. To unmask the epitopes slides were boiled in 10 mM sodium citrate for 60  
207 minutes and cooled to room temperature. Slides were washed with PBS. Slides were put  
208 into peroxidase blocking reagent (225 mL methanol, 25 mL 30% hydrogen peroxide) for  
209 10 minutes, and washed with PBS. Afterward, slides were washed with distilled water,  
210 sections were counterstained with hematoxylin and washed under running water.

211 Cell proliferation was assessed using an antibody against PCNA and the HistoMouse kit-  
212 plus kit (Invitrogen/Thermo Fisher Scientific), using AEC single solution chromogen, and  
213 then counterstained with hematoxylin. Sections were mounted with cover glass and  
214 Fluoromount G media.

215 For TSC2 and pS6 IHC primary antibodies against pS6 (Ser235/236) (2211, Cell Signaling  
216 Technology) at a dilution of 1:250 and TSC2 (sc-271314, Santa Cruz Biotechnology) at a  
217 dilution of 1:100 were used and incubated at 4 °C overnight, rinsed, and then treated with

218 anti-rabbit-HRP secondary antibody at room temperature for 60 minutes, followed by  
219 rinsing and slide preparation as above.  
220 To identify apoptotic cells, ApopTag plus peroxidase in situ apoptosis detection kit (Merck  
221 Millipore) was used according to the manufacturer's instructions.

## 222 **Statistical analysis**

223       The quantitative data of the xenograft tumor experiments are reported as the mean  
224  $\pm$  standard deviation for at least 5 tumors. Tumor sizes for the different treatment groups  
225 were compared using the Wilcoxon Rank Sum test using GraphPad Prism software. P-  
226 values less than 0.05 were considered statistically significant.

227

228 **Results**

229 TSC1/TSC2 are known recessive oncogenes whose loss is known to activate  
230 mTORC1. Here we sought to identify and characterize cancer cell lines with complete loss  
231 of either TSC1 or TSC2, and then to examine their sensitivity to a broad panel of kinase  
232 inhibitors, with a goal to identify additional inhibitors beyond rapalogs.

233 **Identification of cancer cell lines lacking expression of either TSC1 or TSC2**

234 Data from the Broad Institute Cancer Cell Line Encyclopedia (CCLE) (26) was  
235 reviewed to identify tumor cell lines with mutations in either *TSC1* or *TSC2*. Among 1457  
236 cell lines, 49 were reported to have mutations in *TSC1* and 111 to have mutations in *TSC2*.  
237 These mutations were reviewed to identify those with nonsense mutations, frameshift  
238 deletions or insertions, or in-frame deletions in either *TSC1* or *TSC2*, yielding 4 cell lines  
239 with probable mutations in *TSC1* and 10 with probable mutations in *TSC2* (**Table 1**).

240

241 **Table 1 CCLE cell lines with reported nonsense mutations, frameshift deletions or insertions, or in-frame deletions in *TSC1* and *TSC2***

242 (adapted from 27, 28)

| tumor sample                      | allele ratio<br>var./total | genome change, hg19            | variant classification | variant type | reference allele | tumor seq. allele | cDNA change      | codon change          | protein change     |
|-----------------------------------|----------------------------|--------------------------------|------------------------|--------------|------------------|-------------------|------------------|-----------------------|--------------------|
| <b><i>TSC1, chromosome 9</i></b>  |                            |                                |                        |              |                  |                   |                  |                       |                    |
| PEER_HAEM_AND_LYMPH               | 1.00                       | g.chr9:135798751C>T            | Nonsense_Mutation      | SNP          | C                | T                 | c.492G>A         | c.(490-492)TGG>TGA    | p.(Trp164*)        |
| KM12_LARGE_INTESTINE              | 0.56                       | g.chr9:135797261_135797261delA | Frame_Shift_Del        | DEL          | A                | -                 | c.608_608delT    | c.(607-609)TTGfs      | p.(Leu203Cysfs*7)  |
| 2313287_STOMACH                   | 0.52                       | g.chr9:135785954G>A            | Intron                 | SNP          | G                | A                 | c.1263+4C>T      |                       |                    |
| CW2_LARGE_INTESTINE               | 0.47                       | g.chr9:135781157_135781157delG | Frame_Shift_Del        | DEL          | G                | -                 | c.1808_1808delC  | c.(1807-1809)CCGfs    | p.(Pro603Argfs*26) |
| <b><i>TSC2, chromosome 16</i></b> |                            |                                |                        |              |                  |                   |                  |                       |                    |
| NCIH1651_LUNG                     | 0.33                       | g.chr16:2100401G>T             | Nonsense_Mutation      | SNP          | G                | T                 | c.139G>T         | c.(139-141)GAA>TAA    | p.(Glu47*)         |
| CW2_LARGE_INTESTINE               | 0.60                       | g.chr16:2108787_2108788insT    | Frame_Shift_Ins        | INS          | -                | T                 | c.888_889insT    | c.(886-891)GTGTTTfs   | p.(Val299Cysfs*39) |
| HEC151_ENDOMETRIUM                | 0.42                       | g.chr16:2121790_2121791insAG   | Frame_Shift_Ins        | INS          | -                | AG                | c.1952_1953insAG | c.(1951-1953)CCAFs    | p.(Gly654Glufs*45) |
| DV90_LUNG                         | 0.36                       | g.chr16:2121791_2121792delAG   | Frame_Shift_Del        | DEL          | AG               | -                 | c.1953_1954delAG | c.(1951-1956)CCAGAGfs | p.(Gly654Leufs*2)  |
| OVK18_OVARY                       | 0.67                       | g.chr16:2121791_2121792delAG   | Frame_Shift_Del        | DEL          | AG               | -                 | c.1953_1954delAG | c.(1951-1956)CCAGAGfs | (Gly654Leufs*2)    |
| MFE319_ENDOMETRIUM                | 0.42                       | g.chr16:2122880C>T             | Nonsense_Mutation      | SNP          | C                | T                 | c.2251C>T        | c.(2251-2253)CGA>TGA  | p.(Arg751*)        |
| SNU-886_LIVER                     | 0.97                       | g.chr16:2129160C>T             | Nonsense_Mutation      | SNP          | C                | T                 | c.3094C>T        | c.(3094-3096)CGA>TGA  | p.(Arg1032*)       |

|                    |      |                               |                   |     |     |   |                   |                         |                |
|--------------------|------|-------------------------------|-------------------|-----|-----|---|-------------------|-------------------------|----------------|
| SNU-878_LIVER      | 1.00 | g.chr16:2134999C>G            | Nonsense_Mutation | SNP | C   | G | c.4541C>G         | c.(4540-4542)TCA>TGA    | p.(Ser1514*)   |
| HEC151_ENDOMETRIUM | 0.45 | g.chr16:2138565G>A            | Missense_Mutation | SNP | G   | A | c.5378G>A         | c.(5377-5379)CGG>CAG    | p.(Arg1793Gln) |
| HCC95_LUNG         | 0.60 | g.chr16:2138578_2138580delCTC | In_Frame_Del      | DEL | CTC | - | c.5391_5393delCTC | c.(5389-5394)ATCTCC>ATC | p.(Ser1799del) |

243

244

245 All of these cell lines were obtained, and mutations were confirmed by Sanger  
246 sequencing (**S1 Fig**). The cell line PEER showed a homozygous nonsense mutation in *TSC1*;  
247 SNU-878 and SNU-886 showed homozygous nonsense mutations in *TSC2*. All other cell  
248 lines had mutations with allele ratios around 0.5.

#### 249 **mTOR pathway assessment**

250 As further confirmation of mutational status for these cell lines, we performed  
251 immunoblotting to assess expression of TSC1 and TSC2, and mTORC1 signaling, which  
252 should be activated in the absence of either TSC1 or TSC2 (**Fig 1**). There was no expression  
253 of TSC1 in PEER cells, and absence of TSC2 in SNU-878 and SNU-886 cells. All other cell  
254 lines showed some degree of expression of TSC1 or TSC2, as expected. Levels of AKT, S6K,  
255 and S6 were similar among all cell lines. Persistent activation of S6K by phosphorylation at  
256 Thr389, and S6 by phosphorylation at Ser240/244 in the absence of serum (29, 30), was seen  
257 in PEER, SNU-878, and SNU-886, consistent with constitutive mTORC1 activation.  
258 Increased pS6K (Thr389) and pS6 (Ser240/244) levels in the absence of serum were also seen  
259 in MFE-319 and OVK18 cells, both of which are known to have PTEN mutations (26, 31,  
260 32).

261

#### 262 **Fig 1. Identification and characterization of cell lines with *TSC1* or *TSC2* mutations.**

263 Cells were serum starved for 24h (–) or had serum add back for 30 min (+) after starvation.  
264 MGH-U1, a bladder cancer cell line with normal mTOR signaling, was used as a control.

265

266 Absence of TSC1 expression was seen in the cell line PEER and absence of TSC2  
267 expression in the cell lines SNU-878 and SNU-886. Constitutive mTOR activity was seen,  
268 indicated by increased pS6K (Thr389) and pS6 (Ser240/244) expression in serum starvation,  
269 in PEER, MFE-319, OVK18, SNU-886, and SNU-887 cells. GAPDH was used as a loading  
270 control.

271  
272           425 cancer cell lines were also screened for large deletions in the *TSC1* and *TSC2*  
273 genes by the MLPA method (see Methods). After a round of screening followed by repeat  
274 assessment using probes for each exon of *TSC1* and *TSC2*, the osteosarcoma cell line CAL-72  
275 showed homozygous deletion of exons 6 to 23 of *TSC1*; and the hepatocellular carcinoma cell  
276 line SNU-398 showed homozygous deletion of exons 10-41 of *TSC2*.

277           Hence the five cell lines, PEER, CAL-72, SNU-878, SNU-886, and SNU-398, were  
278 studied in greater detail. CAL-72 and PEER cells both showed complete loss of TSC1 and  
279 reduced TSC2 expression (**Fig 2**), consistent with the effect of TSC1 in stabilizing TSC2  
280 protein levels through heterocomplex formation, as shown previously (33). SNU-878, SNU-  
281 886, and SNU-398 showed complete loss of TSC2 and normal TSC1 expression (**Fig 2**). The  
282 levels of mTOR, AKT, BIP, S6K, and S6 were similar among all cell lines. pS6K (Thr389),  
283 pS6 (Ser235/236 and Ser240/244), and pEIF2 $\alpha$  (Ser51) were increased in the absence of  
284 serum in all TSC1 or TSC2 deficient cell lines, indicating constitutive mTORC1 activation.  
285 The control cell line MGH-U2 showed low levels of pS6K (Thr389) and pS6 (Ser235/236 and  
286 Ser240/244) when serum-starved, indicating normal mTORC1 regulation.  
287 PEER and SNU-398 showed no AKT activation, as assessed by lack of pAKT (Ser473), in  
288 serum absence and serum add back conditions (**Fig 2**). This has been observed previously in  
289 many other cell lines with a constitutive mTORC1 activation, consistent with an active  
290 feedback suppression due to mTORC1 activation (30, 34, 35). CAL-72, SNU-886, SNU-878,  
291 and the control cell line showed increased pAKT-Ser473 levels in response to serum add  
292 back.

293

## 294 **Fig 2. Characterization of TSC1 and TSC2 deficient cell lines**

295 Immunoblots of TSC1 and TSC2 deficient cell lines were performed to examine multiple  
296 components of the mTORC1 signaling pathway. Cells were serum starved for 24h (–) or had

297 serum add back for 30 min (+) after starvation. CAL-72 and PEER cells showed no TSC1 and  
298 reduced TSC2 expression. SNU-878, SNU-886, and SNU-398 showed an absence of TSC2  
299 expression. pS6K (Thr389), pS6 (Ser235/236 and Ser240/244) p4E-BP1 (Thr37/46), and  
300 pEIF2 (Ser51) showed a strong expression in a serum starved condition in all TSC1 or TSC2  
301 deficient cell lines, indicating constitutive mTORC1 activation. GAPDH and BIP were used  
302 as loading controls.

303

304 Variable 4E-BP1 expression was seen among these cell lines, but all TSC1 or TSC2  
305 deficient cell lines showed similar levels of expression of p4E-BP1-Thr37/Thr46 in serum-  
306 deprived and serum add back conditions. Expression of p-eIF2 $\alpha$  (Ser51) was also higher in  
307 TSC1 or TSC2 deficient cells in comparison to the control cell line (**Fig 2**).

308

### 309 **Kinase inhibitor library screen and IC<sub>50</sub> determination**

310 The cell lines SNU-878, SNU-886, SNU-398, CAL-72, and PEER were screened for  
311 sensitivity to kinase inhibition using a kinase inhibitor-focused library (LINCS), which  
312 contained 197 selective kinase inhibitors (**S1 Table**). This library was composed of  
313 commercially available and self-developed pharmacophore-diverse ATP competitive kinase  
314 inhibitors. The library contained inhibitors against multiple different kinases, including those  
315 involved in: regulation of the cell cycle (cyclin-dependent kinases (CDKs), CLK2, Polo-like  
316 kinases (PLKs), and Aurora kinases); DNA damage repair (checkpoint kinases (CHKs),  
317 CNSK1E, and ATMs); ligand - receptor tyrosine kinase signaling (VEGFR, HER2, EGFR,  
318 PDGFR, and FGFR); mitogen-activated protein kinases (MAPKs, MEKs, ERKs, B-Raf,  
319 mTOR, PI3Ks, AKT); intracellular tyrosine kinases (FLT3, Srcs, Syk, FAKs, BTK/BMX, c-  
320 Kit or c-Met, c-Raf, ABL, Bcr-Abl, JAKs, LCK, Tie2, DDR, RET); serine/threonine kinases  
321 (Rock 2, Rsk2, DNA-PKcs, BRSK2, RIPK1, PKC, TBK1, MNK2, Wee1 and LOKs); and a  
322 further diverse set (GSK3, PDK1, Alk, IKK-2, ITK, IRAK1, CSF1R, ULK1, LRRK2,



323 EPHB3, CAMKs, PIKfyve, IGF-1R, PARPs, HSP-90, p53, Rho, Bcl-2, c-FMS, PI4KIII,  
324 EPHB4 and CK1). In this initial screen, a single dose of inhibitor was used, 600nM. All  
325 compounds that showed > 50% reduction in growth for one or more cell lines in this assay  
326 were considered initial positive hits and were subject to further study on all cell lines.  
327 A wide variety of inhibitors showed a positive signal in this initial assay, including multiple  
328 mTOR, CDK, PLK, CHK, Aurora, and HSP90 inhibitors (**Table 2**).

329

330 **Table 2 IC<sub>50</sub> determination of the most effective drugs.**

331

**IC<sub>50</sub> in nM for cell line**

| <b>inhibitor target</b>             | <b>PEER</b> | <b>CAL-72</b> | <b>SNU-878</b> | <b>SNU-886</b> | <b>SNU-398</b> |
|-------------------------------------|-------------|---------------|----------------|----------------|----------------|
| Rapamycin <i>mTORC1</i>             | NR          | NR            | NR             | NR             | NR             |
| WYE-125132 <i>mTORC1/2</i>          | >1000<br>0  | 31            | 55             | 55             | 58             |
| AZD8055 <i>mTORC1/2</i>             | >1000<br>0  | 40            | 38             | 52             | 73             |
| Torin1 <i>mTORC1/2</i>              | 844         | 37            | 300            | 120            | 340            |
| Torin2 <i>mTORC1/2/PI3Ks/DNA-PK</i> | 40          | 6             | 12             | 9              | 19             |
| INK128 <i>mTORC1/2</i>              | 102         | 44            | 23             | 30             | 67             |
| CGP60474 <i>CDKs, mTOR</i>          | 46          | 41            | 50             | 36             | 24             |
| Flavopiridol <i>pan-CDKs</i>        | 179         | 123           | 172            | 121            | 68             |
| BMS-387032 <i>CDKs</i>              | 245         | 408           | 949            | 978            | 95             |
| GSK2126458 <i>PI3K</i>              | 925         | 39            | 25             | 10             | 103            |
| GSK461364 <i>PLK</i>                | 3454        | >10000        | 33             | 5              | 6              |
| HMN-214 <i>PLK</i>                  | 82          | 1208          | 171            | 193            | 223            |
| WZ3105 <i>CLK2/CNSK1E/FLT3/ULK1</i> | 108         | 322           | 1515           | 1254           | 60             |
| PF477736 <i>CHK1</i>                | 29          | ND            | ND             | ND             | 25             |
| AZD7762 <i>CHKs</i>                 | 50          | 185           | 25             | 71             | 124            |
| MK 1775 <i>Wee1</i>                 | 207         | 364           | 86             | 354            | 144            |
| Chelerythrine chloride <i>PKC</i>   | 148         | ND            | ND             | ND             | 2532           |

|                 |                    |     |    |    |    |        |
|-----------------|--------------------|-----|----|----|----|--------|
| SB525334        | <i>TGFBR1</i>      | 6   | ND | ND | ND | >10000 |
| GSK1070916      | <i>AuroraA,B,C</i> | 2   | ND | ND | ND | 3103   |
| ZM-447439       | <i>AuroraA,B</i>   | 156 | ND | ND | ND | 672    |
| AZD1152-<br>HQA | <i>AuroraA,B,C</i> | 7   | ND | ND | ND | >10000 |
| XMD16-144       | <i>AuroraA,B</i>   | 4   | ND | ND | ND | 552    |
| NVP-AUY922      | <i>HSP90</i>       | 2   | 9  | 12 | 10 | 10     |
| Ganetespib      | <i>HSP90</i>       | 3   | 22 | 14 | 35 | 9      |

332 NR, IC50 not reached at 10 $\mu$ M. ND, not done.

333

#### 334 **mTOR and PI3K inhibitor effects on TSC1/TSC2 null cell lines**

335 Candidate inhibitors were studied against most or all of the TSC1/TSC2-deficient cell

336 lines in standard 96 well plate growth assays over a dose range of 1 nM to 10 $\mu$ M (**Table 2**).

337 We focus on the results with the mTOR inhibitors first. Rapamycin, an mTORC1 allosteric

338 inhibitor, did not achieve IC50 over this dose range (**S2 Fig**). Among the 5 other mTOR

339 inhibitors, Torin2 showed the lowest IC50 for each of the 5 cell lines (**S3-S7 Fig**), similar to

340 previous studies (39). This may relate to its intrinsic potency, or to its additional inhibitory

341 effects on DNA-PKcs, PIK3C, PIK3R, and PI4KB (36). The other mTOR inhibitors studied

342 also have inhibitory effects on other kinases (**S1 Table**) (37-39). Among the cell lines, PEER

343 was universally the most resistant, requiring the highest dose of all inhibitors to achieve IC50

344 (**Table 2, S3-S7 Fig**).

#### 345 **Cell cycle inhibitor effects on the TSC1/TSC2 null cell lines**

346 Several cell cycle inhibitors showed significant growth inhibition for the TSC mutant

347 cells lines, including CDK, PLK, and Aurora kinase inhibitors (40). However, these inhibitors

348 in general also have cross-reactivity with several other kinases. All cell lines were sensitive to  
349 Flavopiridol with fairly uniform IC<sub>50</sub> values ranging from 68 to 179 nM (**Table 2**), and were  
350 even more sensitive to CGP60474, which may have been due to inhibitory effects on mTOR  
351 (**Table 2, S8-10 Fig**).

352 The three *TSC2* null liver carcinoma cell lines SNU-886, SNU-878, and SNU-398  
353 were uniformly sensitive to GSK461364, a PLK1 inhibitor, while in contrast the *TSC1* null  
354 cell lines PEER and CAL-72 were not sensitive at all (**Table 2**) with IC<sub>50</sub> values ranging from  
355 5 to 33 nM. PLK1 promotes G2/M-phase transition (41) and PLK1 inhibition stimulates  
356 lysosomal localization of mTOR and consequently decreased autophagy activation (42). The  
357 SNU cell lines were less sensitive to another PLK inhibitor, HMN-214, an oral pro-drug of  
358 HMN-176, which interferes with the location and consequently the function of PLK1 (43)  
359 (**Table 2, S11 and S12 Fig**).

360 *TSC1* null PEER cells were very sensitive to all Aurora inhibitors with IC<sub>50</sub> values  
361 ranging from 2 to 156 nM (**Table 2**). In contrast, *TSC2* null SNU-398 cells were much less  
362 sensitive to Aurora inhibitors (**Table 2, S13-S16 Fig**).

363

#### 364 **HSP90 inhibitors**

365 All cell lines were very sensitive to both NVP-AUY922 and ganetespib, HSP90 inhibitors,  
366 with IC<sub>50</sub> values ranging from 2 to 12 nM and 3 to 35 nM, respectively (**Table 2, S17 and**  
367 **S18 Fig**).

368

#### 369 **Combination treatment with mTORC1 and HSP90 inhibitors.**

370 Given the activity of mTORC1 inhibitors and HSP90 inhibitors individually, we  
371 examined the potential synergistic effect of combination treatment using drugs from both  
372 classes. Ganetespib was serially diluted three-fold from 10 μM to 1.5 nM. The Torin2  
373 concentration was fixed at 5nM, and the rapamycin concentration at 20 nM. Combined

374 therapy of ganetespib and rapamycin or ganetespib and Torin2 showed some degree of  
 375 additive effect with lower IC<sub>50</sub> values in some cases (Table 3, Fig 3). However, the  
 376 significance of this additive effect was not clear.

377

378 **Table 3 IC<sub>50</sub> determination of Torin2, Ganetespib and combination therapy**

|                                        |                              | IC <sub>50</sub> in nM for cell line |        |         |         |         |
|----------------------------------------|------------------------------|--------------------------------------|--------|---------|---------|---------|
| inhibitor target                       |                              | PEER                                 | CAL-72 | SNU-878 | SNU-886 | SNU-398 |
| Torin2                                 | <i>mTORC1/2/PI3Ks/DNA-PK</i> | 40                                   | 6      | 12      | 9       | 19      |
| Ganetespib                             | <i>HSP90</i>                 | 3                                    | 22     | 14      | 35      | 9       |
| Ganetespib + Torin2 (fixed at 5nM)     |                              | 6                                    | 20     | 8       | 9       | 4       |
| Ganetespib + Rapamycin (fixed at 20nM) |                              | 6                                    | 17     | 6       | 5       | 2       |

379

380 **Fig 3. Cell viability after ganetespib, ganetespib with Torin2 and ganetespib with**  
 381 **rapamycin treatment**

382 Ganetespib was serially diluted three-fold from 10 μM to 1.5 nM. The Torin2 concentration  
 383 was 5nM, and the rapamycin concentration 20 nM. Cell viability was determined 72h after  
 384 treatment using CellTiter-Glo and XLfit4.0 software. Cell viability is shown in relative  
 385 control activity, n= 2-4. IC<sub>50</sub> was calculated as the drug concentration that reduced cell  
 386 viability by 50% compared to untreated cells. All TSC1 or TSC2 deficient tumor cell lines  
 387 showed a strongly decreased cell viability after treatment with ganetespib. Combined therapy

388 of genetespib and rapamycin or genetespib and Torin2 showed an additive effect with even  
389 lower IC50 values. However, the significance of this additive effect was not clear.

390

#### 391 **Generation and characterization of add back derivatives of the TSC2 mutant cell lines**

392 TSC2-encoding or empty vectors were added via retroviral transfection to the TSC2-/-  
393 cell lines SNU-886, SNU-878, and SNU-398, to generate TSC2 add-back and control cell  
394 lines. Immunoblot analysis demonstrated that TSC2 expression was restored in the TSC2 add-  
395 back derivatives. pS6 (Ser240/244) levels were decreased in the absence of serum conditions  
396 in the TSC2 add back cells, indicating return to normal regulation of mTORC1. pAKT  
397 (Ser473) expression was quite low in the TSC2 add back cells, but increased significantly in  
398 response to serum stimulation in the cell lines SNU-886 and SNU-878, compared to the levels  
399 of native or empty vector-transfected cells. SNU-398 did not show a pAKT (Ser473)  
400 expression increase in TSC2 add back cells (**Fig 4**).

401

#### 402 **Fig 4. Expression and signaling effects of TSC2 add back to TSC2 deficient cells.**

403 TSC2 cDNA or an empty vector was added to TSC2 deficient cell lines via retroviral  
404 transfection. Cells were serum starved for 24h (-) or had serum add back for 30 min (+). In  
405 the TSC2 add back cells there is a strong TSC2 expression, a decreased pS6 (S240/244)  
406 expression in the absence of serum, and increased pAKT (Ser473) expression following  
407 serum add back. No pAKT (Ser473) was seen in SNU-398 cells, with or without TSC2  
408 addback.

409

410 These three TSC2 add back cell lines were used in drug testing experiments similar to  
411 what was done above. Interestingly, TSC2 add back cells had a 3 to 6-fold higher IC50 for  
412 both Torin1 and INK 128 than their empty vector controls or original unmanipulated cells

413 (Table 4, S5 and S7 Fig). However, in contrast, the three other mTOR kinase inhibitors,  
 414 WYE-125132, Torin2, and AZD8055, showed no significant difference in IC<sub>50</sub> between  
 415 TSC2 add back cells and cells with EV or the unmanipulated starting cells (Table 4, S3, S4,  
 416 S6 Fig). Minor differences in IC<sub>50</sub> was seen for these cell lines using multiple other inhibitors  
 417 (Table 4, S2, S8-S12, S15, S17-S21 Fig).

418

419 **Table 4 IC<sub>50</sub> determination of TSC2 deficient cells, cells with TSC2 add back and**  
 420 **control vector**

**IC<sub>50</sub> in nM**

| inhibitor target                         | SNU-<br>878             | +<br>TSC2 | +<br>control | SNU-<br>886 | +<br>TSC2 | +<br>control |
|------------------------------------------|-------------------------|-----------|--------------|-------------|-----------|--------------|
|                                          | Rapamycin <i>mTORC1</i> | NR        | NR           | NR          | NR        | NR           |
| WYE-<br>125132 <i>mTORC1/2</i>           | 55                      | 20        | 15           | 55          | 36        | 13           |
| AZD8055 <i>mTORC1/2</i>                  | 38                      | 24        | 13           | 52          | 41        | 32           |
| Torin1 <i>mTORC1/2</i>                   | 300                     | 1076      | 205          | 120         | 660       | 140          |
| Torin2 <i>mTORC1/2/PI3Ks/DN<br/>A-PK</i> | 12                      | 10        | 8            | 9           | 9         | 8            |
| INK 128 <i>mTORC1/2</i>                  | 23                      | 140       | 12           | 30          | 119       | 16           |
| CGP60474 <i>CDKs, mTOR</i>               | 50                      | 62        | 64           | 36          | 36        | 24           |
| Flavopiridol <i>pan-CDKs</i>             | 172                     | 163       | 201          | 121         | 145       | 109          |
| BMS-<br>387032 <i>CDKs</i>               | 949                     | 1047      | 754          | 978         | 1113      | 1261         |
| GSK212645<br>8 <i>PI3K</i>               | 25                      | 5         | 14           | 10          | 6         | 5            |

|                                             |      |      |      |      |      |      |
|---------------------------------------------|------|------|------|------|------|------|
| GSK461364 <i>PLK</i>                        | 33   | 24   | 21   | 5    | 5    | 7    |
| HMN-214 <i>PLK</i>                          | 171  | 177  | 100  | 193  | 268  | 204  |
| WZ3105<br><i>CLK2/CNSK1E/<br/>FLT3/ULK1</i> | 1515 | 1072 | 1152 | 1254 | 1137 | 1050 |
| AZD7762 <i>CHKs</i>                         | 25   | 40   | 37   | 71   | 58   | 57   |
| MK 1775 <i>Wee1</i>                         | 86   | 135  | 110  | 354  | 250  | 112  |
| NVP-<br>AUY922<br><i>HSP90</i>              | 12   | ND   | ND   | 10   | 16   | 7    |
| Ganetespib <i>HSP90</i>                     | 14   | 59   | 10   | 35   | 24   | 10   |

421

### IC<sub>50</sub> in nM

| <b>inhibitor target</b>                     | <b>SNU-<br/>398</b> | <b>+ TSC2</b> | <b>+<br/>control</b> |
|---------------------------------------------|---------------------|---------------|----------------------|
| Rapamycin <i>mTORC1</i>                     | NR                  | NR            | NR                   |
| WYE-<br>125132<br><i>mTORC1/2</i>           | 58                  | 80            | 25                   |
| AZD8055 <i>mTORC1/2</i>                     | 73                  | 109           | 55                   |
| Torin1 <i>mTORC1/2</i>                      | 340                 | 679           | 184                  |
| Torin2<br><i>mTORC1/2/PI3Ks/DNA-<br/>PK</i> | 19                  | 16            | 10                   |
| INK 128 <i>mTORC1/2</i>                     | 67                  | 576           | 59                   |
| CGP60474 <i>CDKs, mTOR</i>                  | 24                  | 33            | 30                   |
| Flavopiridol <i>pan-CDKs</i>                | 68                  | 88            | 75                   |
| BMS-387032 <i>CDKs</i>                      | 95                  | 96            | 85                   |



|                |                                         |     |     |     |
|----------------|-----------------------------------------|-----|-----|-----|
| GSK2126458     | <i>PI3K</i>                             | 103 | 122 | 73  |
| GSK461364      | <i>PLK</i>                              | 6   | 3   | 4   |
| HMN-214        | <i>PLK</i>                              | 223 | 192 | 173 |
| WZ3105         | <i>CLK2/CNSK1E/FLT3/</i><br><i>ULK1</i> | 60  | 68  | 84  |
| AZD7762        | <i>CHKs</i>                             | 124 | 107 | 154 |
| MK 1775        | <i>Wee1</i>                             | 144 | 122 | 55  |
| NVP-<br>AUY922 | <i>HSP90</i>                            | 10  | ND  | ND  |
| Ganetespib     | <i>HSP90</i>                            | 9   | 11  | 9   |

422

#### 423 **Effects of rapamycin, Torin1 and ganetespib on protein expression and mTOR signaling**

424 To examine the impact of these drugs on mTOR signaling in the TSC-mutant cell  
425 lines, PEER, CAL-72, SNU-886, SNU-878, and SNU-398 cells were treated with rapamycin  
426 10 nM, Torin1 250 nM, and ganetespib at doses ranging from 100 nM to 1  $\mu$ M for 24 hours.  
427 Both rapamycin and Torin1 had little effect on expression levels of mTOR, AKT, S6K, and  
428 S6; while both reduced expression of pS6K (T389) and pS6 (S240/244) to a major degree in  
429 the absence of serum, as well as with serum stimulation (**Fig 5**). These findings were expected  
430 given their inhibition of the constitutively activated mTORC1. pAKT (Ser473) levels were  
431 also lower in Torin1-treated cells compared to rapamycin-treated cells, as expected given its  
432 inhibition of mTORC2 as well as mTORC1. pAKT (Ser473) levels were higher in rapamycin-  
433 treated SNU-886 and SNU-878 cells than controls, due to feedback activation of IGF1 and  
434 hence mTORC2, which phosphorylates AKT, as described previously (35, 49) PEER and

435 SNU-398 did not show pAKT (Ser473) expression regardless of treatment, suggesting that  
436 other mutations and/or pathways effects were operative in these cells (**Fig 5**).

437

438 **Fig 5. Impact of rapamycin and Torin1 on constitutively activated mTOR signaling**  
439 **pathway in TSC1 or TSC2 deficient cells.**

440 Cells were treated with Torin1 (250 nM) or rapamycin (20 nM) for 24h. Untreated cells and  
441 MGH-U1 were used as controls. Cells were serum starved for 24h (-) or received after  
442 starvation serum add back for 30 min (+). Rapamycin and Torin1-treated cells show no  
443 expression of pS6K (Thr389) and pS6 (Ser 240/244) in serum absence or stimulated  
444 conditions compared to the upregulated expression in untreated cells. pAKT (Ser 473) levels  
445 are lower after Torin1 and higher after rapamycin treatment.

446 Ganetespib at lower doses, up to 10 nM, had little or no effect on expression of key  
447 mTOR signaling proteins, or activation of mTORC1, as assessed by pS6 (Ser240/244) levels  
448 (**Fig 6**). At 100 nM and 1  $\mu$ M, there was a major decrease in expression of mTOR, AKT, and  
449 pS6 (Ser240/244) expression in all cell lines (**Fig 6**).

450

451 **Fig 6. Effect of ganetespib on protein expression and mTORC1 signaling in TSC-**

452 **mutant cell lines.** Cells were treated with ganetespib in increasing concentrations (1, 10, 100  
453 nM, and 1  $\mu$ M) for 24h. Cells were serum starved for 24h (-) or after starvation had serum  
454 add back for 30 min (+). Effects on mTOR, AKT, and pS6 (Ser240/244) expression were seen  
455 at 0.1 and 1mM.

456

457 We also examined the effects of ganetespib on phosphorylation of 4E-BP1 and  
458 induction of apoptosis as assessed by cleaved caspase 3 levels (51) (**Fig 7**). Ganetespib at  
459 100nM had little or no effect on phosphorylation of 4E-BP1; while rapamycin 20nM had

460 variable effects in different cell lines, and Torin1 completely eliminated phosphorylation in  
461 all cell lines, as assessed by mobility shift (**Fig 7**). This lack of effect of ganetespib is  
462 consistent with previous studies (50). Cleaved caspase 3 levels varied widely among these 5  
463 cell lines. PEER cells had high levels of cleaved caspase 3 under all conditions, likely due to  
464 growth in suspension culture, such that dead cells could not be eliminated. Nonetheless  
465 cleaved caspase 3 levels were increased at high doses of ganetespib in PEER cells. SNU-886  
466 showed a major increase in cleaved caspase 3 levels after ganetespib treatment, and no or  
467 minimal effect from rapamycin or Torin1. SNU-878 cells showed a major increase in cleaved  
468 caspase 3 levels after each of rapamycin, Torin1, and ganetespib. CAL-72 and SNU-398 cells  
469 showed no increase in cleaved caspase 3 in response to any treatment.

470 **Fig 7 Impact of rapamycin, Torin1, and ganetespib on constitutively activated mTOR**  
471 **signaling and cleaved caspase 3.** Cells were treated with rapamycin (20 nM), Torin1 (250  
472 nM) or ganetespib (100 nM) for 24h. Cells were serum starved for 24h (-) or received after  
473 starvation serum add back for 30 min (+). Cells treated with rapamycin do not show  
474 expression of pS6 (Ser240/244) and expression of p4E-BP1 isoforms are reduced due to  
475 mTORC1 inhibition. Torin1-treated cells show no pS6 (Ser240/244), p4E-BP1, and a lowered  
476 pAKT (Ser473) expression, due to mTORC1/2 inhibition. Ganetespib-treated cells show a  
477 lowered AKT, S6K, and pS6 (Ser240/244) expression. The expression of cleaved caspase 3 is  
478 very distinctive among different cell lines.

479 The observation that there was little effect on mTORC1 signaling or protein  
480 expression in any of the cell lines near the IC50 dose of ganetespib (3 to 35nM) suggests that  
481 the growth inhibition effects were being mediated by other client proteins of HSP90 whose  
482 expression was likely reduced to some extent at doses near 10nM, and likely a collective  
483 effect on multiple HSP90 client proteins.

## 484 **Mouse xenograft tumor model studies**

485           Given the evidence of some synergy in the growth inhibition of the TSC1/TSC2 null  
486 cell lines in response to combined mTOR and HSP90 inhibition, and evidence that they were  
487 impacting growth through different mechanisms, we explored the potential synergistic effect  
488 of treatment with these compounds in vivo using a subcutaneous xenograft tumor model with  
489 SNU-398 cells.  $3.0 \times 10^6$  SNU-398 cells were injected subcutaneously into the flank region of  
490 immunodeficient CB17SC-M (*C.B-Igh-1<sup>b</sup>/IcrTac-Prkdc<sup>scid</sup>*) mice. After approximately 10  
491 days palpable and measurable tumors with a diameter of 3-5 mm were noted. Mice were  
492 treated with rapamycin, INK 128, or ganetespib, using doses described previously as being  
493 the maximal tolerated dose, in studies by ourselves and others (30, 48).

494 Mice were treated when tumors had a mean (SD) diameter of 7.8 (1.7) mm and a mean (SD)  
495 volume of 186 (110) mm<sup>3</sup>, after a mean (SD) of 18 (4.8) days after tumor cell injection.

496 Treatment with the individual drugs was assigned randomly.

497 Growth of xenograft tumor nodules was reduced by each of the three drugs, with ganetespib,  
498 50 mg/kg by tail vein injection 1 time/week, having the least effect; and rapamycin, 3mg/kg  
499 given intra-peritoneally 3 days per week, having the greatest effect; and INK 128, 1 mg/kg by  
500 gavage 5 days/week, being intermediate (**Fig 8a and b, S22 a-d Fig**).

501

502 **Fig 8. Xenograft tumor growth under vehicle, rapamycin, INK 128, ganetespib (a, b)**  
503 **combined ganetespib and INK 128 (c) and ganetespib and rapamycin (d) treatment.**

504 Tumor volume is shown as normalized to tumor volume at day 1 of treatment. Tumor size is  
505 shown as mean and standard deviation. Normalized tumor size of different treatment groups  
506 was compared on day 22 using Wilcoxon Rank Sum test. P-values less than 0.05 were  
507 considered statistically significant. Mice were treated with rapamycin (3 mg/kg, 3x/week, i.p.,  
508 n=5), INK 128(1mg/kg, 5x/week, i.g., n=5) or ganetespib (50mg/kg, 1x/week, i.v., n=9) (a) or

509 in combination of ganetespib and INK 128 (n=5) (c) or ganetespib and rapamycin (n=6) (d).  
510 Tumor size of treated mice is significantly smaller on day 22 compared to mice, which  
511 received vehicle (n=8) (b).

512

513 We then examined the potential benefit of combination treatment, with ganetespib and  
514 rapamycin, or with ganetespib and INK 128, in this xenograft model system. Combination  
515 ganetespib-rapamycin had similar effects on growth as rapamycin alone (**Fig 8d**). In contrast,  
516 ganetespib-INK 128 showed apparent synergy with a greater effect on growth than either drug  
517 alone although this did not achieve statistical significance (**Fig 8 c, S22e and f Fig**). None of  
518 the treated mice showed ill effects from treatment, including weight loss >10%, or skin  
519 lesions.

520 We also examined the effects of the drug treatments on mTOR signaling in vivo,  
521 through analysis of tumors by immunohistochemistry (IHC), and immunoblotting of tumor  
522 lysates. Histologically, the tumors were not homogeneous, with necrotic areas centrally and  
523 high proliferation in the periphery of nodules, regardless of treatment, as is commonly seen in  
524 xenograft models.

525 IHC against proliferating cell nuclear antigen (PCNA) was used to assess proliferation  
526 (52), and the ApopTag kit was used to detect apoptotic cells by the TUNEL method (53).  
527 IHC showed no TSC2 expression in the tumors. Vehicle and ganetespib-treated tumors were  
528 pS6 (Ser235/236)+. In contrast rapamycin-treated tumors had much reduced pS6  
529 (Ser235/236) expression, and this was also lower in INK 128-treated tumors, in comparison to  
530 the tumors treated with ganetespib or vehicle (**Fig 9**).

531

532 **Fig 9. Immunohistochemical analysis of xenograft tumors of mice treated with vehicle,**  
533 **INK 128, ganetespib, or rapamycin for 21 days.** Xenograft tumors generated from SNU-  
534 398 cells were harvest 24h after ganetespib treatment, 6h after INK 128 and rapamycin

535 treatment, and stained using H&E, pS6 (S235/236), TSC2, ApopTag, or PCNA antibodies.  
536 Images shown were 60X magnified, insets showed portions of the tumor at higher  
537 magnification (400X). Tumors showed a distinct vascularization. TSC2 was not expressed in  
538 any tumor. PS6 (S235/236) expression was stronger in vehicle- and ganetespib-treated mice  
539 and correlated with locations of higher proliferation.

540 Immunoblots of harvested tumors, carefully dissected for viable and not necrotic  
541 regions, and livers, of mice treated with vehicle, rapamycin, INK 128, ganetespib, and the  
542 combinations were performed to examine the effect of the drugs on protein expression and the  
543 mTORC1 pathway in vivo. None of the treated livers showed major changes in expression of  
544 AKT or S6K (**Fig 10**). Similarly S6 and 4EB-P1 levels were similar under all treatments,  
545 with the exception of the ganetespib and INK 128 combination, which reduced both  
546 considerably (**Fig 10**). TSC2 expression was low in all xenografts, as expected, with some  
547 expression seen likely due to ingrowing vessels and connective tissue. pAKT (Ser473)  
548 expression was also universally low, as expected (**Fig 10**). Both rapamycin alone and in  
549 combination with ganetespib abolished pS6K (Thr389) and pS6 (Ser240/244) expression;  
550 while INK 128 alone or in combination reduced pS6 (Ser240/244) and eliminated pS6K  
551 (Thr389) (**Fig 10**). None of the treatments affect 4E-BP1 isoform expression, while the  
552 ganetespib and INK 128 combination reduced overall 4E-BP1 expression. Livers from the  
553 treated mice showed similar effects as the xenograft nodules, from each drug, except that pS6  
554 (Ser240/244) was relatively highly expressed in the INK 128 treated liver (**Fig 10**).

555

556 **Fig 10. Effects of rapamycin, INK 128, ganetespib, and combination treatment on**  
557 **expression and mTOR signaling in SNU-398 xenograft tumor and liver cells.** Mice were  
558 treated with rapamycin (3 mg/kg, 3x/week, i.p.), INK 128 (1mg/kg, 5x/week, p. o.),  
559 ganetespib (50mg/kg, 1x/week, i.v.) or in combination. Tumors were harvest and lysed 24h  
560 after ganetespib treatment and 6h after INK 128 or rapamycin treatment. Rapamycin

561 treatment inhibited pS6K (Thr 389) and pS6 (Ser240/244) expression in the tumors. INK 128  
562 treatment reduced pS6K (Thr 389), pS6 (Ser240/244), and p4E- BP1 isoform expression.  
563 Ganetespib reduced pS6K (Thr 389) and pS6 (Ser240/244) expression in some tumors.  
564 Combined ganetespib and rapamycin or INK 128 treatment showed a stronger inhibition of  
565 the mTOR pathway than each drug by itself. Rapamycin even inhibited pS6 (Ser240/244)  
566 expression in the liver. *Abbreviations: c: cells from cell culture, v: vehicle, G: Ganetespib, I:*  
567 *INK 128, R: Rapamycin.*

## 568 **Discussion**

569           The current and accelerating trend in cancer therapy is the use of personalized (also  
570 called targeted or directed) cancer treatment. Such targeted therapies may be directed at  
571 genetic mutations which are driver events in cancer; or at expressed proteins, such as the  
572 estrogen receptor in breast cancer (54).

573           One resource that has been developed for a better understanding of cancer  
574 development, and to investigate potential targeted therapies are cancer cell lines, including the  
575 Cancer Cell Line Encyclopedia of 947 human cancer cell lines (55). In this study we searched  
576 for cancer cell lines with bi-allelic inactivating mutations in *TSC1* or *TSC2* from this resource.  
577 From a large set of candidate cell lines, subjected to sequencing and immunoblotting, we  
578 identified 5 cell lines with a total loss of either TSC1 or TSC2, and which also showed  
579 constitutively upregulated mTORC1 signaling, as indicated by high expression of pS6K  
580 (Thr389) and pS6 (Ser240/244) in the absence of serum. Two other cell lines, MFE-319 and  
581 OVK18, also showed constitutively upregulated mTORC1 signaling as well as upregulated  
582 pAKT (Ser473) expression, likely due to loss of PTEN by mutation (31, 32).

583           The mTORC1 signaling pathway is one of the main regulators of cell growth, which acts by  
584 enhancing anabolic biosynthetic pathways in both normal and cancer cells. The mTOR  
585 signaling pathway is involved in many important processes including proliferation,  
586 autophagy, protein and lipid synthesis (4, 56), lysosome and ribosome biogenesis, glucose and  
587 mitochondrial metabolism (57), and angiogenesis (58). As a key regulator of cell growth, the  
588 mTOR pathway is regulated by many upstream signals including hypoxia, inflammation,  
589 growth factors, DNA damage, energy deficiency, and nutrients (3). Both the PI3K and  
590 MAPK/Erk pathways influence activation of mTORC1, with signaling through PI3K and  
591 downstream elements having the predominant effect.

592           mTOR is an atypical serine/threonine kinase, and forms the key component of two  
593 protein complexes, mTORC1 and mTORC2. The TSC1 and TSC2 proteins function in a



594 complex with a third component, TBC1D7 (9), as one major regulator of mTORC1. The TSC  
595 protein complex functions as a GTPase activating protein for the small GTP binding protein  
596 RHEB, a member of the extended RAS family of proteins. The TSC2 protein contains the  
597 GAP domain for RHEB and TSC1 has a stabilizing function for TSC2, such that both TSC1  
598 and TSC2 are absolutely required for the activity of the TSC protein as a GAP for RHEB.  
599 RHEB-GTP binds to and activates mTORC1 at the lysosomal membrane. Hence, loss of the  
600 TSC protein complex, either TSC1 or TSC2, leads to high levels of RHEB-GTP, and  
601 constitutive activation of mTORC1 (59).

602         Inactivating mutations in either *TSC1* or *TSC2* in the germ line cause Tuberous  
603 Sclerosis Complex, an autosomal dominant neurocutaneous disorder, characterized by skin  
604 lesions, neuropsychiatric disorders and mainly benign tumors of the brain, kidney, lung, heart,  
605 and skin (2, 4). Mutation and loss of function of *TSC1* and/or *TSC2* have also been shown to  
606 occur consistently in a variety of sporadic cancers including bladder, kidney, pancreatic  
607 neuroendocrine tumors, and PEComa. More rarely *TSC1/TSC2* mutations have been identified  
608 in many other cancer types, though whether they are important driver events or passenger  
609 mutations is not clear in many instances.

610         Following our identification of five cell lines, PEER, CAL-72, SNU-886, SNU-878,  
611 and SNU-398, with bi-allelic mutation and loss of either *TSC1* or *TSC2*, we performed drug  
612 screen using 197 kinase inhibitors. The cell lines were sensitive to several mTOR inhibitors,  
613 but also HSP90 and cell cycle inhibitors. In addition, PEER cells were sensitive to Aurora  
614 kinase inhibitors.

615         We showed that the sensitivity of these cell lines to mTOR inhibitors like Torin1 and  
616 INK 128 correlated strongly with the deficiency of TSC2 and could be reversed by add back  
617 of TSC2 expression. However, we did not see this correlation with WYE-125132, AZD8055,  
618 and Torin2, which may reflect the activities of these compounds on kinases other than mTOR.

619 Various rapalogs have been approved for treatment of various cancers, but complete  
620 responses are rare, and the PR rate is typically 5-10% (60-62). In addition, there are several  
621 case reports of exceptional response to rapalogs for several different types of cancer, some of  
622 which have been durable, going on for several years. These include PEComa (6), renal cell  
623 carcinoma (63), bladder cancer (64), and anaplastic thyroid cancer (63, 65). The reason why  
624 some patients with TSC1 or TSC2 mutant cancers have dramatic responses to rapalogs while  
625 the vast majority do not, is not understood.

626         One potential reason for the limited therapeutic benefit of rapalogs, is their lack of  
627 effect on many mTORC1 phosphorylation targets, including 4E-BP1. In addition, rapalog  
628 therapy induces many feedback loops leading to re-activation of PI3K and AKT signaling  
629 (66). Here we demonstrated that rapamycin was very effective at inhibiting classic mTORC1  
630 downstream targets, including S6K and S6 phosphorylation, and showed minimal reduction in  
631 4E- BP1 phosphorylation in these TSC mutant cancer cell lines. The mTORC2 pathway was  
632 not inhibited by rapamycin, and AKT phosphorylation was upregulated in some cell lines,  
633 likely due to feedback and counter-regulatory pathways (66). Rapamycin treatment induced  
634 very little apoptosis, but rather suppressed cell growth.

635         Potentially, newer ATP kinase pocket directed mTOR inhibitors could or should be  
636 more effective in controlling the growth of cells and tumors with TSC1/TSC2 inactivation.  
637 Torin1, for example, showed complete inhibition of phosphorylated 4E-BP1 and AKT.  
638 However, an apoptotic effect was still lacking. In addition, in our xenograft assay, rapamycin  
639 was more effective than the dual mTORC1/2 inhibitor INK 128 in inhibition of growth of the  
640 TSC2 null S-398 cell line. However, this may reflect the consequence of dual mTORC1 and  
641 mTORC2 inhibition by INK 128, leading to a lower tolerable dose, and less effective  
642 suppression of each of mTORC1 and mTORC2. Other off-target effects of this drug may also  
643 contribute to in vivo toxicity, limiting effective targeting of mTOR.

644 The HSP90 inhibitors ganetespib and NVP-AUY922 both showed strong inhibition of growth  
645 of all five TSC1/TSC2 null cell lines in vitro, with IC<sub>50</sub>'s in the range of 2 to 35 nM.  
646 Ganetespib was studied in greater detail. Ganetespib reduced mTOR, AKT, and S6K, as well  
647 as pS6, levels in all cell lines, but at 100 nM, a dose higher than the IC<sub>50</sub> dose. These results  
648 suggest that ganetespib's effect was not due directly to effects on mTOR signaling, but rather  
649 likely to broad effects in lowering expression of HSP90's client proteins.

650         Based on these findings of growth inhibition by ganetespib in vitro, we performed  
651 tumor xenograft experiments using the TSC2 null SNU-398 cell line. This cell line showed  
652 robust growth in immunodeficient CB17SC-M scid mice as subcutaneous xenografts. All  
653 three of rapamycin, INK 128, and ganetespib, when given at previously determined doses  
654 near the maximally tolerated dose, showed a significant effect on the growth of the SNU-398  
655 xenografts (**Fig 8**). Rapamycin was the most effective drug in these experiments, while INK  
656 128 and ganetespib had less effects on growth and were similar to each other. Notably, all 3  
657 drugs caused a reduction in growth rate, but none showed tumor regression.

658 Next, we examined the potential of combination therapy using ganetespib with each of the  
659 other two drugs. Ganetespib combined with INK 128 showed greater reduction in tumor  
660 growth than either drug alone, although this did not quite meet statistical significance (**Fig**  
661 **8c**). In contrast, ganetespib combined with rapamycin showed nearly identical effects in  
662 tumor growth inhibition to rapamycin alone, indicating no in vivo synergy from the  
663 combination (**Fig 8d**).

664         Multiple past studies have examined the interaction between mTOR signaling and  
665 HSP90, and the potential benefit of HSP90 inhibition on growth of cell lines lacking *TSC1* or  
666 *TSC2*. Blenis and colleagues found that the combination of glutaminase (GLS) and HSP90  
667 inhibition selectively triggered the death of TSC1/TSC2 deficient cells (67), likely due to the  
668 combination of oxidative and proteotoxic stress. Mollapour and colleagues reported that  
669 TSC1 was a co-chaperone of HSP90, facilitating HSP90 function to enhance proper folding of

670 client proteins, including TSC2 (68). They then went on to show that loss of TSC1 leads to  
671 reduced acetylation of HSP90 at K407/K419, which leads to decreased binding by ganetespib;  
672 and that inhibition of histone deacetylases with concurrent ganetespib treatment led to  
673 enhanced growth suppression of RT4, a TSC1 null bladder cancer cell line (69).

674 In addition, the combination of rapamycin and HSP90 inhibitors has been previously  
675 studied for treatment of hepatocellular cancer (HCC) (69). Lang et al. reported that the  
676 combination of rapamycin and 17-(dimethylaminoethylamino)-17-demethoxygeldanamycin  
677 (17-DMAG), an HSP90 inhibitor, had a greater effect than either drug alone in reducing the  
678 growth rate of Huh-7 cells, an HCC cell line, in a subcutaneous xenograft model (69).  
679 However, the difference in comparison to single drug treatments was modest, and the  
680 combination reduced tumor growth without causing reduction in tumor size. They also  
681 studied a syngeneic orthotopic model of HCC, using a mouse HCC cell line, Hepa129. In that  
682 model, the rapamycin - 17-DMAG combination showed a dramatic synergistic effect in  
683 reducing tumor volume (69). There are many differences between this study and ours  
684 reported here, including different cell lines, different agents and doses being studied, and use  
685 of a syngeneic orthotopic model, that may explain these distinct results.

686 Numerous inhibitors of HSP90 have been developed as potential anticancer drugs.  
687 Many such drugs, including ganetespib, have been evaluated in clinical trials, but none have  
688 been approved by the FDA, due to lack of benefit. The main reason for the limited efficacy  
689 appears to be that at effective doses of HSP90 inhibition, there is release of the HSF1  
690 transcription factor from HSP90, which enters the nucleus leading to a pro-survival heat shock  
691 response (70). Nonetheless clinical trials of HSP90 inhibitors often combined with other  
692 agents continue (see <https://www.clinicaltrials.gov/>).

693 In conclusion, we have identified and validated five cancer cell lines that have  
694 complete loss of either *TSC1* or *TSC2*, and consequent constitutive mTORC1 activation.  
695 Through our kinase inhibitor screen, we identified a number of inhibitors that have some

696 activity on these cell lines, including cell cycle kinase and HSP90 kinase inhibitors. In vitro,  
697 the HSP90 inhibitors NVP-AUY922 and ganetespib had major inhibitory effects on the  
698 growth of all five lines in the nanomolar range. However, this appeared to be due to global  
699 effects on HSP90 client protein expression, and not a specific effect on components of the  
700 mTOR signaling pathway. In vivo analysis of an HCC subcutaneous xenograft model using  
701 the TSC2 null SNU-398 cell line showed that ganetespib at usual doses had minimal effects  
702 on tumor growth both alone and in combination with rapamycin and INK 128. Rapamycin  
703 showed activity superior to that of INK 128 in vivo.

704

#### 705 **Acknowledgements**

706 All cell lines were obtained from the Broad Institute. June Goto, Magdalena Tyburczy, Damir  
707 Khabibullin, and Yvonne Chekaluk provided assistance with procedures; Nathanel Gray  
708 provided the LINCS library.

709

#### 710 **References**

- 711 1. Salussolia CL, Klonowska K, Kwiatkowski DJ, Sahin M. Genetic Etiologies,  
712 Diagnosis, and Treatment of Tuberous Sclerosis Complex. *Annu Rev Genomics Hum Genet.*  
713 2019;20:217-40.
- 714 2. Kwiatkowski DJ, Holets Whittemore V, Thiele EA. Tuberous Sclerosis Complex:  
715 Genes, Clinical Features and Therapeutics. Weinheim, Germany: Wiley-VCH Verlag GmbH  
716 & Co; 2010.
- 717 3. Parkhitko AA, Favorova OO, Khabibullin DI, Anisimov VN, Henske EP. Kinase  
718 mTOR: regulation and role in maintenance of cellular homeostasis, tumor development, and  
719 aging. *Biochemistry (Mosc).* 2014;79(2):88-101.
- 720 4. Henske EP, Jozwiak S, Kingswood JC, Sampson JR, Thiele EA. Tuberous sclerosis  
721 complex. *Nat Rev Dis Primers.* 2016;2:16035.

- 722 5. Robertson AG, Kim J, Al-Ahmadie H, Bellmunt J, Guo G, Cherniack AD, et al.  
723 Comprehensive Molecular Characterization of Muscle-Invasive Bladder Cancer. *Cell*.  
724 2018;174(4):1033.
- 725 6. Dickson MA, Schwartz GK, Antonescu CR, Kwiatkowski DJ, Malinowska IA.  
726 Extrarenal perivascular epithelioid cell tumors (PEComas) respond to mTOR inhibition:  
727 clinical and molecular correlates. *Int J Cancer*. 2013;132(7):1711-7.
- 728 7. Valvezan AJ, Manning BD. Molecular logic of mTORC1 signalling as a metabolic  
729 rheostat. *Nat Metab*. 2019;1(3):321-33.
- 730 8. Wolfson RL, Sabatini DM. The Dawn of the Age of Amino Acid Sensors for the  
731 mTORC1 Pathway. *Cell Metab*. 2017;26(2):301-9.
- 732 9. Dibble CC, Elis W, Menon S, Qin W, Klekota J, Asara JM, et al. TBC1D7 is a third  
733 subunit of the TSC1-TSC2 complex upstream of mTORC1. *Mol Cell*. 2012;47(4):535-46.
- 734 10. Kwiatkowski DJ. Rhebbing up mTOR: new insights on TSC1 and TSC2, and the  
735 pathogenesis of tuberous sclerosis. *Cancer Biol Ther*. 2003;2(5):471-6.
- 736 11. Kang SA, Pacold ME, Cervantes CL, Lim D, Lou HJ, Ottina K, et al. mTORC1  
737 phosphorylation sites encode their sensitivity to starvation and rapamycin. *Science*.  
738 2013;341(6144):1236566.
- 739 12. Yu Y, Yoon SO, Poulgiannis G, Yang Q, Ma XM, Villen J, et al. Phosphoproteomic  
740 analysis identifies Grb10 as an mTORC1 substrate that negatively regulates insulin signaling.  
741 *Science*. 2011;332(6035):1322-6.
- 742 13. Dowling RJ, Topisirovic I, Alain T, Bidinosti M, Fonseca BD, Petroulakis E, et al.  
743 mTORC1-mediated cell proliferation, but not cell growth, controlled by the 4E-BPs. *Science*.  
744 2010;328(5982):1172-6.
- 745 14. Dowling RJ, Topisirovic I, Fonseca BD, Sonenberg N. Dissecting the role of mTOR:  
746 lessons from mTOR inhibitors. *Biochim Biophys Acta*. 2010;1804(3):433-9.

- 747 15. Hsu PP, Kang SA, Rameseder J, Zhang Y, Ottina KA, Lim D, et al. The mTOR-  
748 regulated phosphoproteome reveals a mechanism of mTORC1-mediated inhibition of growth  
749 factor signaling. *Science*. 2011;332(6035):1317-22.
- 750 16. Magaway C, Kim E, Jacinto E. Targeting mTOR and Metabolism in Cancer: Lessons  
751 and Innovations. *Cells*. 2019;8(12).
- 752 17. Garcia-Carbonero R, Carnero A, Paz-Ares L. Inhibition of HSP90 molecular  
753 chaperones: moving into the clinic. *Lancet Oncol*. 2013;14(9):e358-69.
- 754 18. Woodford MR, Backe SJ, Sager RA, Bourboulia D, Bratslavsky G, Mollapour M. The  
755 Role of Heat Shock Protein-90 in the Pathogenesis of Birt-Hogg-Dube and Tuberosus  
756 Sclerosis Complex Syndromes. *Urol Oncol*. 2020.
- 757 19. Trepel J, Mollapour M, Giaccone G, Neckers L. Targeting the dynamic HSP90  
758 complex in cancer. *Nat Rev Cancer*. 2010;10(8):537-49.
- 759 20. Cheng W, Ainiwaer A, Xiao L, Cao Q, Wu G, Yang Y, et al. Role of the novel HSP90  
760 inhibitor AUY922 in hepatocellular carcinoma: Potential for therapy. *Mol Med Rep*.  
761 2015;12(2):2451-6.
- 762 21. Jhaveri K, Modi S. Ganetespib: research and clinical development. *Onco Targets Ther*.  
763 2015;8:1849-58.
- 764 22. Neckers L, Workman P. Hsp90 molecular chaperone inhibitors: are we there yet? *Clin*  
765 *Cancer Res*. 2012;18(1):64-76.
- 766 23. Yang J, Yang JM, Iannone M, Shih WJ, Lin Y, Hait WN. Disruption of the EF-2  
767 kinase/Hsp90 protein complex: a possible mechanism to inhibit glioblastoma by  
768 geldanamycin. *Cancer Res*. 2001;61(10):4010-6.
- 769 24. Goldman JW, Raju RN, Gordon GA, El-Hariry I, Teofilivici F, Vukovic VM, et al. A  
770 first in human, safety, pharmacokinetics, and clinical activity phase I study of once weekly  
771 administration of the Hsp90 inhibitor ganetespib (STA-9090) in patients with solid  
772 malignancies. *BMC Cancer*. 2013;13:152.

- 773 25. Untergasser A, Cutcutache I, Koressaar T, Ye J, Faircloth BC, Remm M, et al.  
774 Primer3--new capabilities and interfaces. *Nucleic acids research*. 2012;40(15):e115.
- 775 26. Barretina J, Caponigro G, Stransky N, Venkatesan K, Margolin AA, Kim S, et al. The  
776 Cancer Cell Line Encyclopedia enables predictive modelling of anticancer drug sensitivity.  
777 *Nature*. 2012;483(7391):603-7.
- 778 27. The Broad Institute of MIT & Harvard. Tuberous sclerosis 1 2012 [Available from:  
779 <https://portals.broadinstitute.org/ccle/page?gene=TSC1>.
- 780 28. The Broad Institute of MIT & Harvard. Tuberous sclerosis 2 2012 [Available from:  
781 <https://portals.broadinstitute.org/ccle/page?gene=TSC2>.
- 782 29. Weng QP, Kozlowski M, Belham C, Zhang A, Comb MJ, Avruch J. Regulation of the  
783 p70 S6 kinase by phosphorylation in vivo. Analysis using site-specific anti-phosphopeptide  
784 antibodies. *J Biol Chem*. 1998;273(26):16621-9.
- 785 30. Guo Y, Kwiatkowski DJ. Equivalent benefit of rapamycin and a potent mTOR ATP-  
786 competitive inhibitor, MLN0128 (INK128), in a mouse model of tuberous sclerosis. *Mol*  
787 *Cancer Res*. 2013;11(5):467-73.
- 788 31. Karlsson T, Krakstad C, Tangen IL, Hoivik EA, Pollock PM, Salvesen HB, et al.  
789 Endometrial cancer cells exhibit high expression of p110beta and its selective inhibition  
790 induces variable responses on PI3K signaling, cell survival and proliferation. *Oncotarget*.  
791 2017;8(3):3881-94.
- 792 32. De P, Williams C, Rojas L, Williams K, Klein J, Starks D, et al. Abstract B092:  
793 Molecular aberrations of the PI3K-AKT-mTORC1/C2 pathway in ovarian cancers: a strategy  
794 for targeted therapy. *Molecular Cancer Therapeutics*. 2018;17, Abstract nr B092.
- 795 33. Chong-Kopera H, Inoki K, Li Y, Zhu T, Garcia-Gonzalo FR, Rosa JL, et al. TSC1  
796 stabilizes TSC2 by inhibiting the interaction between TSC2 and the HERC1 ubiquitin ligase. *J*  
797 *Biol Chem*. 2006;281(13):8313-6.



- 798 34. Zhang H, Cicchetti G, Onda H, Koon HB, Asrican K, Bajraszewski N, et al. Loss of  
799 Tsc1/Tsc2 activates mTOR and disrupts PI3K-Akt signaling through downregulation of  
800 PDGFR. *J Clin Invest*. 2003;112(8):1223-33.
- 801 35. Zhang H, Bajraszewski N, Wu E, Wang H, Moseman AP, Dabora SL, et al. PDGFRs  
802 are critical for PI3K/Akt activation and negatively regulated by mTOR. *J Clin Invest*.  
803 2007;117(3):730-8.
- 804 36. Moret N, Clark NA, Hafner M, Wang Y, Lounkine E, Medvedovic M, et al.  
805 Cheminformatics Tools for Analyzing and Designing Optimized Small-Molecule Collections  
806 and Libraries. *Cell Chem Biol*. 2019;26(5):765-77 e3.
- 807 37. Zhang D, Xia H, Zhang W, Fang B. The anti-ovarian cancer activity by WYE-132, a  
808 mTORC1/2 dual inhibitor. *Tumour Biol*. 2016;37(1):1327-36.
- 809 38. Hidalgo M, Rowinsky EK. The rapamycin-sensitive signal transduction pathway as a  
810 target for cancer therapy. *Oncogene*. 2000;19(56):6680-6.
- 811 39. Fong S, Mounkes L, Liu Y, Maibaum M, Alonzo E, Desprez PY, et al. Functional  
812 identification of distinct sets of antitumor activities mediated by the FKBP gene family. *Proc*  
813 *Natl Acad Sci U S A*. 2003;100(24):14253-8.
- 814 40. Lee SY, Jang C, Lee KA. Polo-like kinases (plks), a key regulator of cell cycle and  
815 new potential target for cancer therapy. *Dev Reprod*. 2014;18(1):65-71.
- 816 41. Pajtler KW, Sadowski N, Ackermann S, Althoff K, Schonbeck K, Batzke K, et al. The  
817 GSK461364 PLK1 inhibitor exhibits strong antitumoral activity in preclinical neuroblastoma  
818 models. *Oncotarget*. 2017;8(4):6730-41.
- 819 42. Ruf S, Heberle AM, Langelaar-Makkinje M, Gelino S, Wilkinson D, Gerbeth C, et al.  
820 PLK1 (polo like kinase 1) inhibits MTOR complex 1 and promotes autophagy. *Autophagy*.  
821 2017;13(3):486-505.
- 822 43. Garland LL, Taylor C, Pilkington DL, Cohen JL, Von Hoff DD. A phase I  
823 pharmacokinetic study of HMN-214, a novel oral stilbene derivative with polo-like kinase-1-

- 824 interacting properties, in patients with advanced solid tumors. *Clin Cancer Res.*  
825 2006;12(17):5182-9.
- 826 44. Schopf FH, Biebl MM, Buchner J. The HSP90 chaperone machinery. *Nat Rev Mol*  
827 *Cell Biol.* 2017;18(6):345-60.
- 828 45. Guba M, von Breitenbuch P, Steinbauer M, Koehl G, Flegel S, Hornung M, et al.  
829 Rapamycin inhibits primary and metastatic tumor growth by antiangiogenesis: involvement of  
830 vascular endothelial growth factor. *Nat Med.* 2002;8(2):128-35.
- 831 46. Neckers L, Blagg B, Haystead T, Trepel JB, Whitesell L, Picard D. Methods to  
832 validate Hsp90 inhibitor specificity, to identify off-target effects, and to rethink approaches  
833 for further clinical development. *Cell Stress Chaperones.* 2018;23(4):467-82.
- 834 47. Sanchez J, Carter TR, Cohen MS, Blagg BSJ. Old and New Approaches to Target the  
835 Hsp90 Chaperone. *Curr Cancer Drug Targets.* 2020;20(4):253-70.
- 836 48. Ying W, Du Z, Sun L, Foley KP, Proia DA, Blackman RK, et al. Ganetespib, a unique  
837 triazolone-containing Hsp90 inhibitor, exhibits potent antitumor activity and a superior safety  
838 profile for cancer therapy. *Mol Cancer Ther.* 2012;11(2):475-84.
- 839 49. Foster DA, Toschi A. Targeting mTOR with rapamycin: one dose does not fit all. *Cell*  
840 *Cycle.* 2009;8(7):1026-9.
- 841 50. Theodoraki MA, Kunjappu M, Sternberg DW, Caplan AJ. Akt shows variable  
842 sensitivity to an Hsp90 inhibitor depending on cell context. *Exp Cell Res.* 2007;313(18):3851-  
843 8.
- 844 51. Porter AG, Janicke RU. Emerging roles of caspase-3 in apoptosis. *Cell Death Differ.*  
845 1999;6(2):99-104.
- 846 52. Choe KN, Moldovan GL. Forging Ahead through Darkness: PCNA, Still the Principal  
847 Conductor at the Replication Fork. *Mol Cell.* 2017;65(3):380-92.
- 848 53. Kyrylkova K, Kyryachenko S, Leid M, Kioussi C. Detection of apoptosis by TUNEL  
849 assay. *Methods Mol Biol.* 2012;887:41-7.

- 850 54. Dunnwald LK, Rossing MA, Li CI. Hormone receptor status, tumor characteristics,  
851 and prognosis: a prospective cohort of breast cancer patients. *Breast Cancer Res.*  
852 2007;9(1):R6.
- 853 55. Garnett MJ, Edelman EJ, Heidorn SJ, Greenman CD, Dastur A, Lau KW, et al.  
854 Systematic identification of genomic markers of drug sensitivity in cancer cells. *Nature.*  
855 2012;483(7391):570-5.
- 856 56. Ben-Sahra I, Manning BD. mTORC1 signaling and the metabolic control of cell  
857 growth. *Curr Opin Cell Biol.* 2017;45:72-82.
- 858 57. DiMario FJ, Jr., Sahin M, Ebrahimi-Fakhari D. Tuberous sclerosis complex. *Pediatr*  
859 *Clin North Am.* 2015;62(3):633-48.
- 860 58. Conciatori F, Bazzichetto C, Falcone I, Pilotto S, Bria E, Cognetti F, et al. Role of  
861 mTOR Signaling in Tumor Microenvironment: An Overview. *Int J Mol Sci.* 2018;19(8).
- 862 59. Inoki K, Li Y, Xu T, Guan KL. Rheb GTPase is a direct target of TSC2 GAP activity  
863 and regulates mTOR signaling. *Genes Dev.* 2003;17(15):1829-34.
- 864 60. Meng LH, Zheng XF. Toward rapamycin analog (rapalog)-based precision cancer  
865 therapy. *Acta Pharmacol Sin.* 2015;36(10):1163-9.
- 866 61. Tian T, Li X, Zhang J. mTOR Signaling in Cancer and mTOR Inhibitors in Solid  
867 Tumor Targeting Therapy. *Int J Mol Sci.* 2019;20(3).
- 868 62. Hua H, Kong Q, Zhang H, Wang J, Luo T, Jiang Y. Targeting mTOR for cancer  
869 therapy. *J Hematol Oncol.* 2019;12(1):71.
- 870 63. Kwiatkowski DJ, Choueiri TK, Fay AP, Rini BI, Thorner AR, de Velasco G, et al.  
871 Mutations in TSC1, TSC2, and MTOR Are Associated with Response to Rapalogs in Patients  
872 with Metastatic Renal Cell Carcinoma. *Clin Cancer Res.* 2016;22(10):2445-52.
- 873 64. Sathe A, Nawroth R. Targeting the PI3K/AKT/mTOR Pathway in Bladder Cancer.  
874 *Methods Mol Biol.* 2018;1655:335-50.

- 875 65. Wagle N, Grabiner BC, Van Allen EM, Amin-Mansour A, Taylor-Weiner A,  
876 Rosenberg M, et al. Response and acquired resistance to everolimus in anaplastic thyroid  
877 cancer. *N Engl J Med*. 2014;371(15):1426-33.
- 878 66. Laplante M, Sabatini DM. mTOR signaling in growth control and disease. *Cell*.  
879 2012;149(2):274-93.
- 880 67. Li J, Csibi A, Yang S, Hoffman GR, Li C, Zhang E, et al. Synthetic lethality of  
881 combined glutaminase and Hsp90 inhibition in mTORC1-driven tumor cells. *Proc Natl Acad*  
882 *Sci U S A*. 2015;112(1):E21-9.
- 883 68. Woodford MR, Sager RA, Marris E, Dunn DM, Blanden AR, Murphy RL, et al.  
884 Tumor suppressor Tsc1 is a new Hsp90 co-chaperone that facilitates folding of kinase and  
885 non-kinase clients. *EMBO J*. 2017;36(24):3650-65.
- 886 69. Woodford MR, Hughes M, Sager RA, Backe SJ, Baker-Williams AJ, Bratslavsky MS,  
887 et al. Mutation of the co-chaperone Tsc1 in bladder cancer diminishes Hsp90 acetylation and  
888 reduces drug sensitivity and selectivity. *Oncotarget*. 2019;10(56):5824-34.
- 889 70. Park HK, Yoon NG, Lee JE, Hu S, Yoon S, Kim SY, et al. Unleashing the full  
890 potential of Hsp90 inhibitors as cancer therapeutics through simultaneous inactivation of  
891 Hsp90, Grp94, and TRAP1. *Exp Mol Med*. 2020;52(1):79-91.

892

893

## 894 **S Fig Legends**

### 895 **S1 Fig. Confirmation of reported mutations by Sanger sequencing**

896 Sequencing traces with mutation are shown, including a control for each sequenced region.

897 PEER cells showed a homozygous nonsense mutation in TSC1 and SNU-878 and SNU-886

898 cells a homozygous nonsense mutation in TSC2. All other cell lines showed heterozygous

899 mutations.

900

901 **S2 Fig. IC50 determination for Rapamycin**

902 Rapamycin was serially diluted three-fold from 10  $\mu$ M to 1.5 nM. Cell viability was  
903 determined 72h after treatment using CellTiter-Glo and XLfit4.0 software. Cell viability is  
904 shown relative to control, n= 2- 4. Rapamycin did not achieve IC50 over this dose range.

905 **S3 Fig. Cell viability after WYE-125132 treatment**

906 WYE-125132 was serially diluted three-fold from 10  $\mu$ M to 1.5 nM. Cell viability was  
907 determined 72h after treatment using CellTiter-Glo and XLfit4.0 software. Cell viability is  
908 shown in relative control activity, n= 2-4. IC<sub>50</sub> was calculated as the drug concentration that  
909 reduced cell viability by 50% compared to untreated cells. WYE-125132 is an mTORC1/2  
910 inhibitor. The SNU cell lines and CAL-72 were very sensitive to all tested mTORC1/2  
911 inhibitors.

912 **S4 Fig. Cell viability after AZD8055 treatment**

913 AZD8055 was serially diluted three-fold from 10  $\mu$ M to 1.5 nM. Cell viability was  
914 determined 72h after treatment using CellTiter-Glo and XLfit4.0 software. Cell viability is  
915 shown in relative control activity, n= 2-4. IC<sub>50</sub> was calculated as the drug concentration that  
916 reduced cell viability by 50% compared to untreated cells. AZD8055 is an mTORC1/2  
917 inhibitor. The SNU cell lines and CAL-72 were very sensitive to all tested mTORC1/2  
918 inhibitors.

919 **S5 Fig. Cell viability after Torin1 treatment**

920 Torin1 was serially diluted three-fold from 10  $\mu$ M to 1.5 nM. Cell viability was determined  
921 72h after treatment using CellTiter-Glo and XLfit4.0 software. Cell viability is shown in  
922 relative control activity, n= 2-6. IC<sub>50</sub> was calculated as the drug concentration that reduced  
923 cell viability by 50% compared to untreated cells. Torin1 is an mTORC1/2 inhibitor. The  
924 SNU cell lines and CAL-72 were very sensitive to all tested mTORC1/2 inhibitors.

925 **S6 Fig. Cell viability after Torin2 treatment**

926 Torin2 was serially diluted three-fold from 10  $\mu$ M to 1.5 nM. Cell viability was determined  
927 72h after treatment using CellTiter-Glo and XLfit4.0 software. Cell viability is shown in  
928 relative control activity, n= 2-4. IC<sub>50</sub> was calculated as the drug concentration that reduced  
929 cell viability by 50% compared to untreated cells. Torin2 is an mTORC1/2 inhibitor. Among  
930 the tested mTOR inhibitors, Torin2 showed the lowest IC<sub>50</sub> for each of the 5 cell lines.

931 **S7 Fig. Cell viability after INK 128 treatment**

932 INK 128 was serially diluted three-fold from 10  $\mu$ M to 1.5 nM. Cell viability was determined  
933 72h after treatment using CellTiter-Glo and XLfit4.0 software. Cell viability is shown in  
934 relative control activity, n= 2-4. IC<sub>50</sub> was calculated as the drug concentration that reduced  
935 cell viability by 50% compared to untreated cells. INK 128 is an mTORC1/2 inhibitor. All  
936 TSC1 or TSC2 deficient tumor cell lines were very sensitive to all tested mTORC1/2  
937 inhibitors.

938 **S8 Fig. Cell viability after Flavopiridol treatment**

939 Flavopiridol was serially diluted three-fold from 10  $\mu$ M to 1.5 nM. Cell viability was  
940 determined 72h after treatment using CellTiter-Glo and XLfit4.0 software. Cell viability is  
941 shown in relative control activity, n= 2-4. IC<sub>50</sub> was calculated as the drug concentration that  
942 reduced cell viability by 50% compared to untreated cells. Flavopiridol is a CDKs inhibitor.  
943 All cell lines were sensitive to Flavopiridol.

944 **S9 Fig. Cell viability after CGP60474 treatment**

945 CGP60474 was serially diluted three-fold from 10  $\mu$ M to 1.5 nM. Cell viability was  
946 determined 72h after treatment using CellTiter-Glo and XLfit4.0 software. Cell viability is  
947 shown in relative control activity, n= 2-4. IC<sub>50</sub> was calculated as the drug concentration that  
948 reduced cell viability by 50% compared to untreated cells. CGP60474 is CDKs and mTOR  
949 inhibitor. All cell lines were sensitive to CGP60474.

950 **S10 Fig. Cell viability after BMS-387032 treatment**

951 BMS-387032 was serially diluted three-fold from 10  $\mu$ M to 1.5 nM. Cell viability was  
952 determined 72h after treatment using CellTiter-Glo and XLfit4.0 software. Cell viability is  
953 shown in relative control activity, n= 2-4. IC<sub>50</sub> was calculated as the drug concentration that  
954 reduced cell viability by 50% compared to untreated cells. BMS-387032 is a CDKs inhibitor.  
955 SNU-398 cells were the most sensitive cell line to BMS-387032.

956 **S11 Fig. Cell viability after GSK461364 treatment**

957 GSK461364 was serially diluted three-fold from 10  $\mu$ M to 1.5 nM. Cell viability was  
958 determined 72h after treatment using CellTiter-Glo and XLfit4.0 software. Cell viability is  
959 shown in relative control activity, n= 2-4. IC<sub>50</sub> was calculated as the drug concentration that  
960 reduced cell viability by 50% compared to untreated cells. GSK461364 is a PLK inhibitor.  
961 The cell lines SNU-886, SNU-878, and SNU-398 were sensitive to GSK461364, while in  
962 contrast the cell lines PEER and CAL-72 were not sensitive.

963 **S12 Fig. Cell viability after HMN-214 treatment**

964 HMN-214 was serially diluted three-fold from 10  $\mu$ M to 1.5 nM. Cell viability was  
965 determined 72h after treatment using CellTiter-Glo and XLfit4.0 software. Cell viability is  
966 shown in relative control activity, n= 2-4. IC<sub>50</sub> was calculated as the drug concentration that  
967 reduced cell viability by 50% compared to untreated cells. HMN-214 is a PLK inhibitor.  
968 PEER cells were most sensitive to HMN-214.

969 **S13 Fig. Cell viability after GSK1070916 treatment**

970 GSK1070916 was serially diluted three-fold from 10  $\mu$ M to 1.5 nM. Cell viability was  
971 determined 72h after treatment using CellTiter-Glo and XLfit4.0 software. Cell viability is  
972 shown in relative control activity, n= 2. IC<sub>50</sub> was calculated as the drug concentration that  
973 reduced cell viability by 50% compared to untreated cells. GSK1070916 is an Aurora A, B  
974 and C inhibitor. TSC1 null PEER cells were very sensitive to all Aurora inhibitors, in contrast  
975 to TSC2 null SNU-398 cells, which were much less sensitive to Aurora inhibitors.

976 **S14 Fig. Cell viability after ZM-447439 treatment**

977 ZM-447439 was serially diluted three-fold from 10  $\mu$ M to 1.5 nM. Cell viability was  
978 determined 72h after treatment using CellTiter-Glo and XLfit4.0 software. Cell viability is  
979 shown in relative control activity, n= 2. IC<sub>50</sub> was calculated as the drug concentration that  
980 reduced cell viability by 50% compared to untreated cells. ZM-447439 is an Aurora A and B  
981 inhibitor. TSC1 null PEER cells were very sensitive to all Aurora inhibitors, in contrast to  
982 TSC2 null SNU-398 cells, which were much less sensitive to Aurora inhibitors.

983 **S15 Fig. Cell viability after AZD1152-HQPA treatment**

984 AZD1152-HQPA was serially diluted three-fold from 10  $\mu$ M to 1.5 nM. Cell viability was  
985 determined 72h after treatment using CellTiter-Glo and XLfit4.0 software. Cell viability is  
986 shown in relative control activity, n= 2. IC<sub>50</sub> was calculated as the drug concentration that  
987 reduced cell viability by 50% compared to untreated cells. AZD1152-HQPA is an Aurora A,  
988 B and C inhibitor. TSC1 null PEER cells were very sensitive to all Aurora inhibitors, in  
989 contrast to TSC2 null SNU-398 cells, which were much less sensitive to Aurora inhibitors.

990 **S16 Fig. Cell viability after XMD16-144 treatment**

991 XMD16-144 was serially diluted three-fold from 10  $\mu$ M to 1.5 nM. Cell viability was  
992 determined 72h after treatment using CellTiter-Glo and XLfit4.0 software. Cell viability is  
993 shown in relative control activity, n= 2. IC<sub>50</sub> was calculated as the drug concentration that  
994 reduced cell viability by 50% compared to untreated cells. XMD16-144 is an Aurora A and B  
995 inhibitor. TSC1 null PEER cells were very sensitive to all Aurora inhibitors, in contrast to  
996 TSC2 null SNU-398 cells, which were much less sensitive to Aurora inhibitors.

997 **S17 Fig. Cell viability after NVP-AUY922 treatment**

998 NVP-AUY922 was serially diluted three-fold from 10  $\mu$ M to 1.5 nM. Cell viability was  
999 determined 72h after treatment using CellTiter-Glo and XLfit4.0 software. Cell viability is  
1000 shown in relative control activity, n= 2-4. IC<sub>50</sub> was calculated as the drug concentration that  
1001 reduced cell viability by 50% compared to untreated cells. NVP-AUY922 is an HSP90  
1002 inhibitor. All cell lines were very sensitive to NVP-AUY922.



1003 **S18 Fig. Cell viability after ganetespib treatment**

1004 Ganetespib was serially diluted three-fold from 10  $\mu$ M to 1.5 nM. Cell viability was  
1005 determined 72h after treatment using CellTiter-Glo and XLfit4.0 software. Cell viability is  
1006 shown in relative control activity, n= 2-4. IC<sub>50</sub> was calculated as the drug concentration that  
1007 reduced cell viability by 50% compared to untreated cells. Ganetespib is an HSP90 inhibitor.  
1008 All cell lines were very sensitive to ganetespib.

1009 **S19 Fig. Cell viability after GSK2126458 treatment**

1010 GSK2126458 was serially diluted three-fold from 10  $\mu$ M to 1.5 nM. Cell viability was  
1011 determined 72h after treatment using CellTiter-Glo and XLfit4.0 software. Cell viability is  
1012 shown in relative control activity, n= 2. IC<sub>50</sub> was calculated as the drug concentration that  
1013 reduced cell viability by 50% compared to untreated cells. GSK2126458 is a PI3K inhibitor.  
1014 CAL-72 und the SNU cell lines were sensitive to GSK2126458.

1015 **S20 Fig. Cell viability after WZ3105 treatment**

1016 WZ3105 was serially diluted three-fold from 10  $\mu$ M to 1.5 nM. Cell viability was determined  
1017 72h after treatment using CellTiter-Glo and XLfit4.0 software. Cell viability is shown in  
1018 relative control activity, n= 2. IC<sub>50</sub> was calculated as the drug concentration that reduced cell  
1019 viability by 50% compared to untreated cells. WZ3105 is a CLK2, CNSK1E, FLT3 and  
1020 ULK1 inhibitor. PEER, CAL-72 and SNU-398 cells were sensitive to WZ3105.

1021 **S21 Fig. Cell viability after MK 1775 treatment**

1022 MK 1775 was serially diluted three-fold from 10  $\mu$ M to 1.5 nM. Cell viability was determined  
1023 72h after treatment using CellTiter-Glo and XLfit4.0 software. Cell viability is shown in  
1024 relative control activity, n= 2-5. IC<sub>50</sub> was calculated as the drug concentration that reduced  
1025 cell viability by 50% compared to untreated cells. MK 1775 is a Wee1 inhibitor. All cell lines  
1026 were sensitive to MK 1775.

1027 **S22 Fig. S-398 tumor xenograft treatment.**

1028 Tumor volume is shown as normalized tumor volume to day 1 of treatment. Tumors were  
1029 measured every 2-3 days. Each tumor is depicted separately, n= 5- 9 per treatment. Mice were  
1030 treated with vehicle (a), ganetespib (50mg/kg, 1x/week, i.v.) (b), INK 128 (1mg/kg, 5x/week,  
1031 i.g.) (c), rapamycin (3 mg/kg, 3x/week, i.p.) (d), or ganetespib and rapamycin combined  
1032 (same doses) (e) or ganetespib and INK 128 combined (same doses) (f). Tumors under  
1033 treatment grew less compared to vehicle-treated tumors.

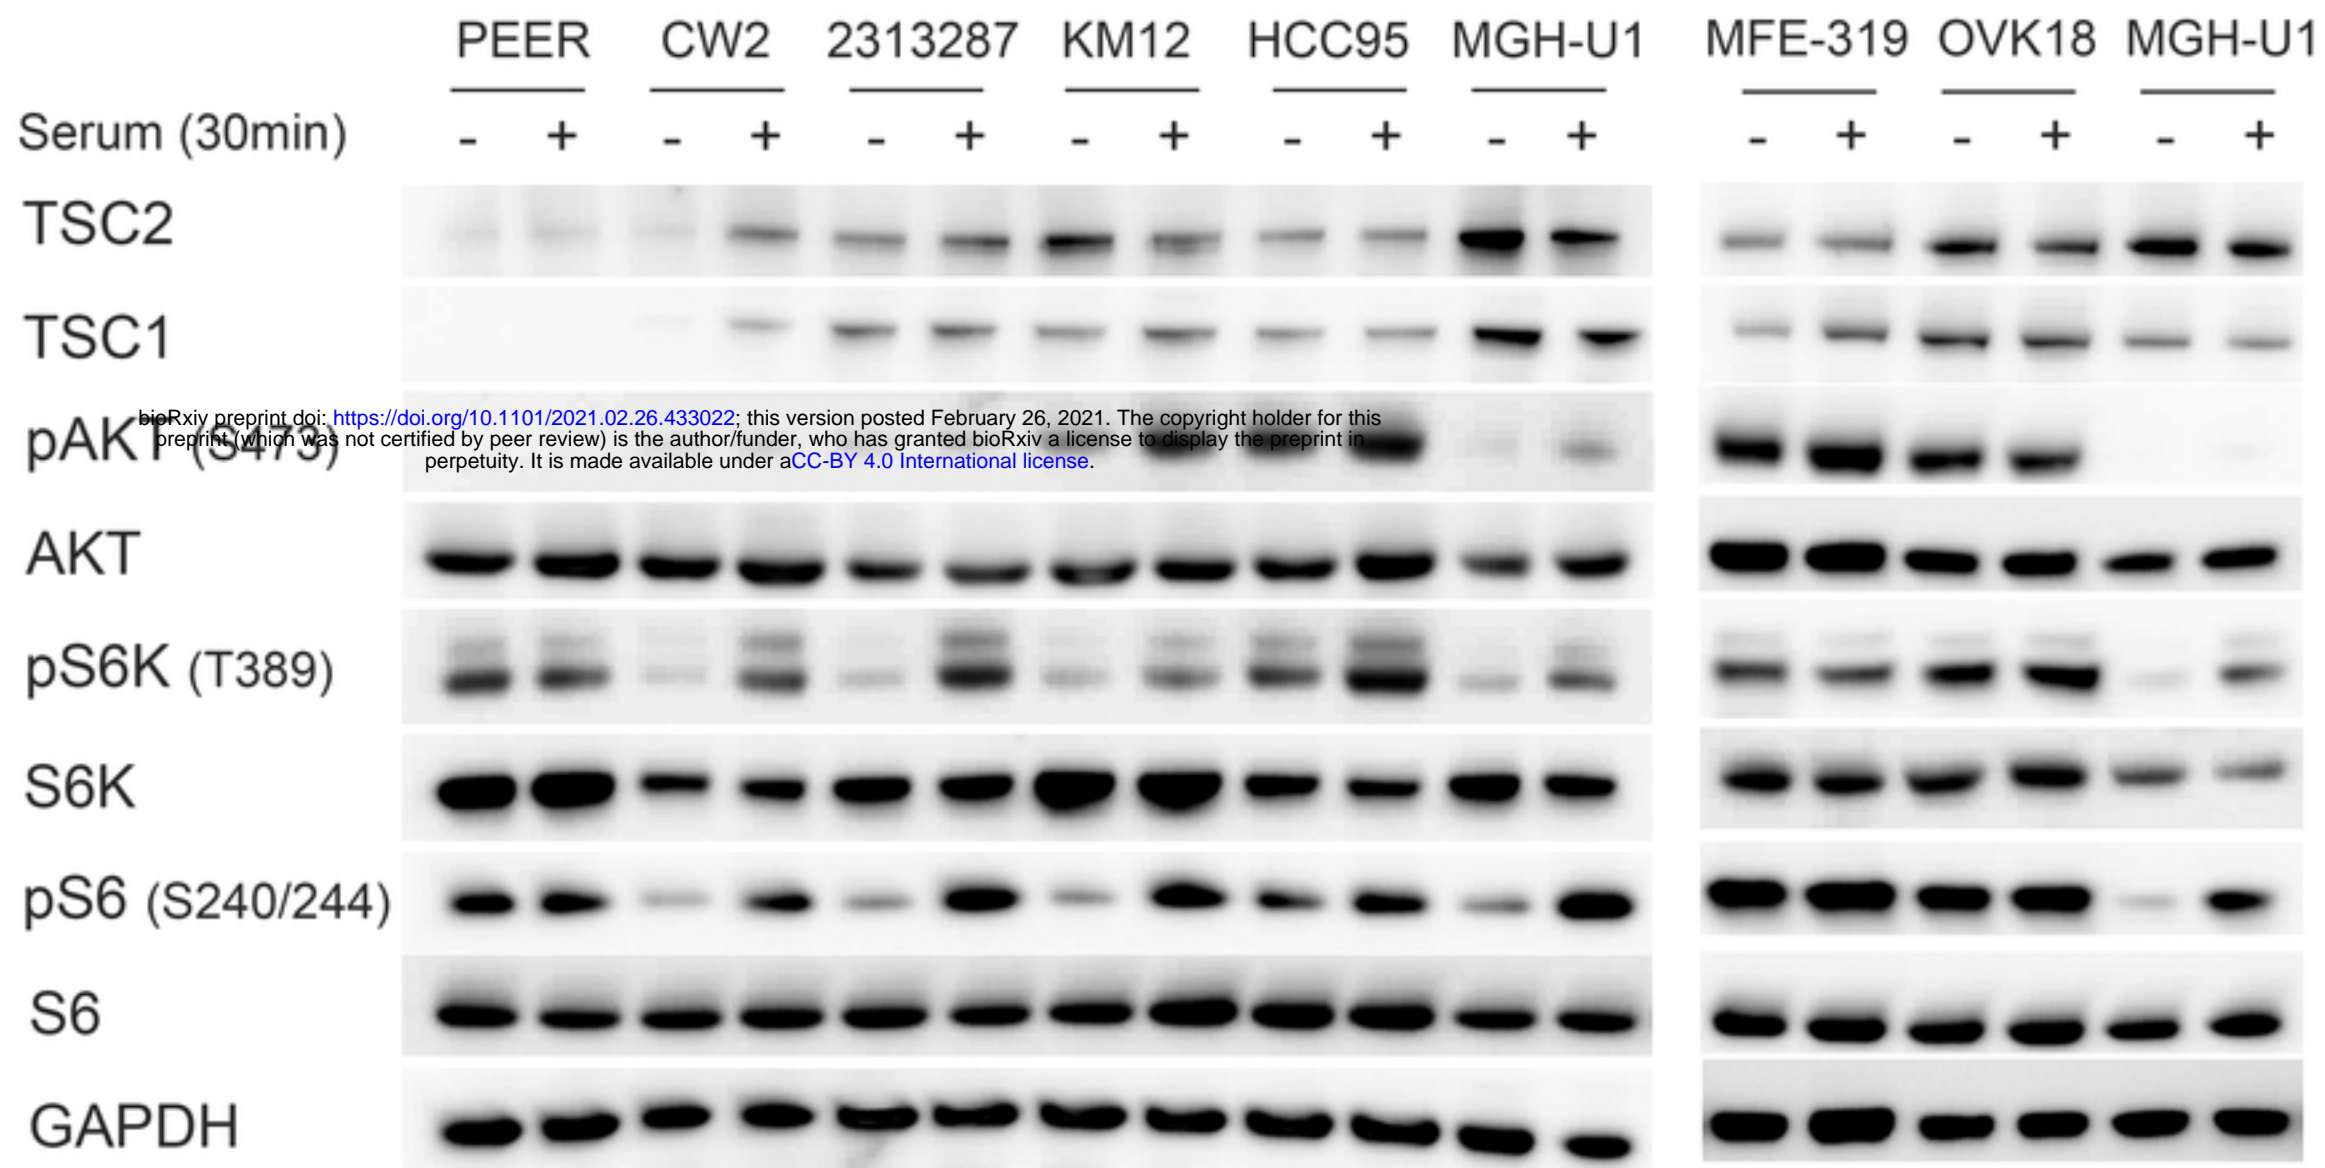

bioRxiv preprint doi: <https://doi.org/10.1101/2021.02.26.433022>; this version posted February 26, 2021. The copyright holder for this preprint (which was not certified by peer review) is the author/funder, who has granted bioRxiv a license to display the preprint in perpetuity. It is made available under aCC-BY 4.0 International license.

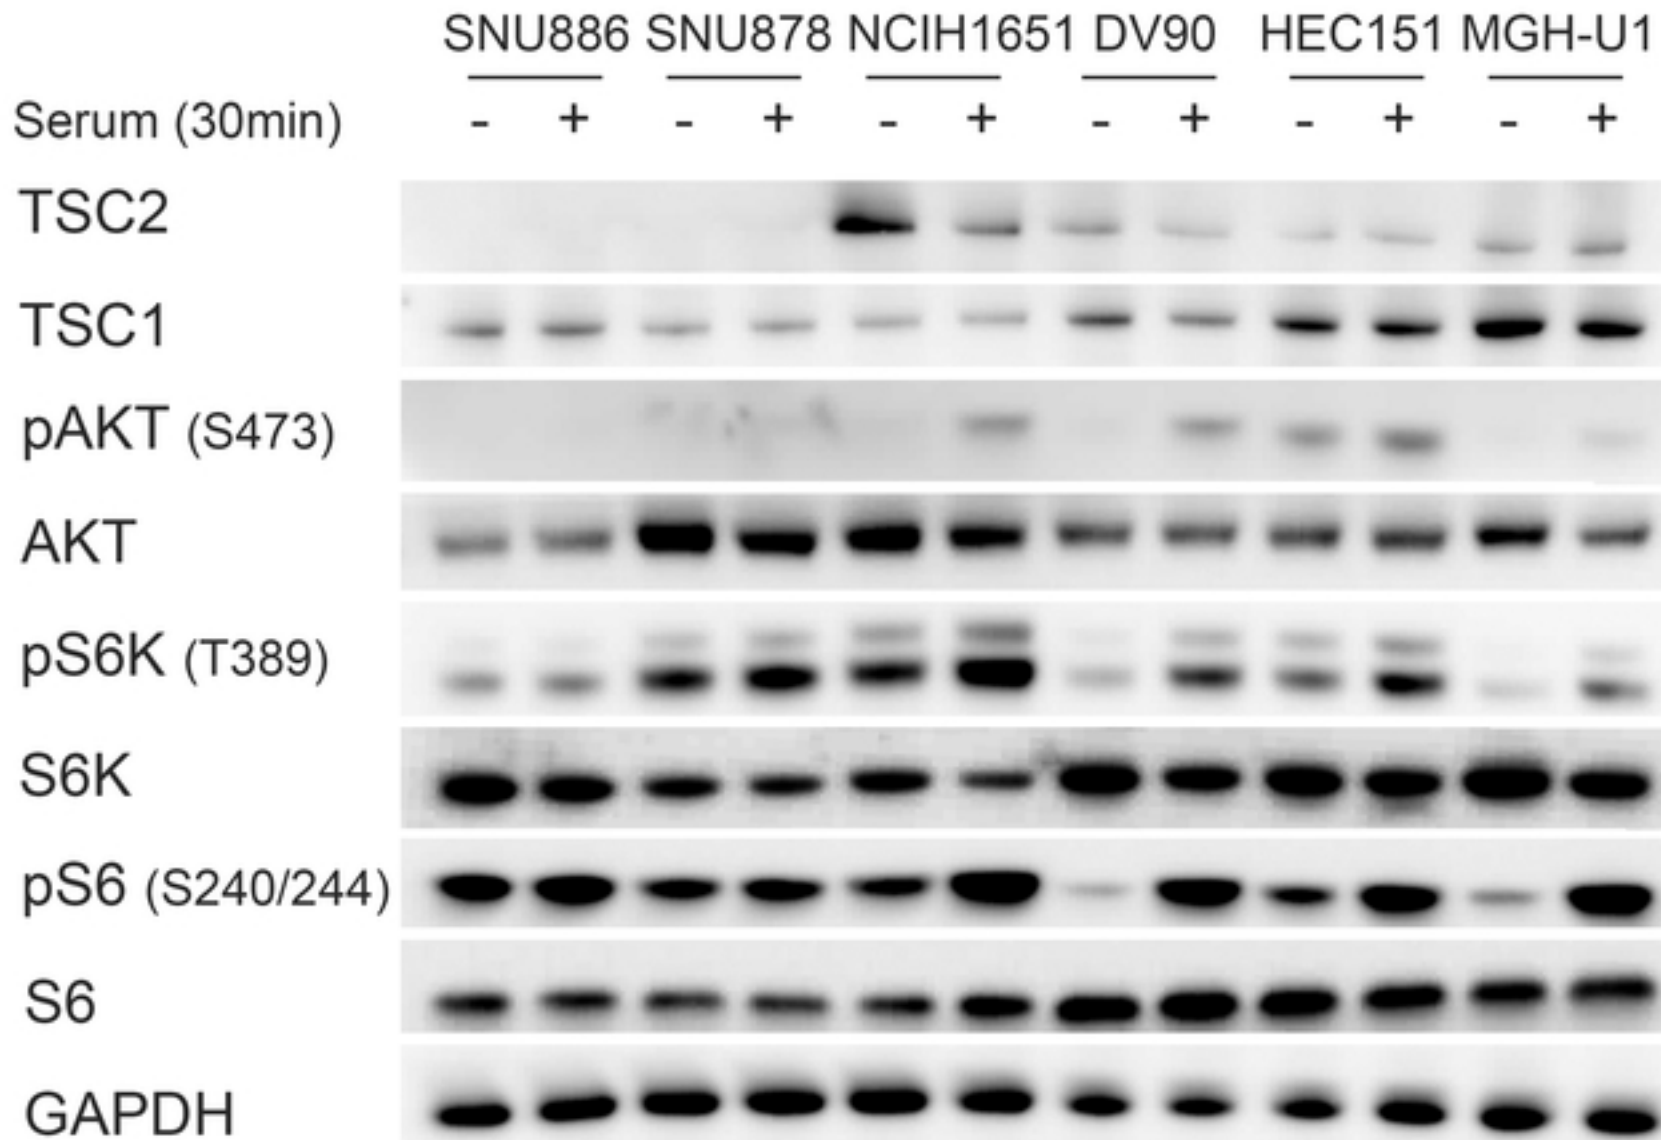

Figure 1

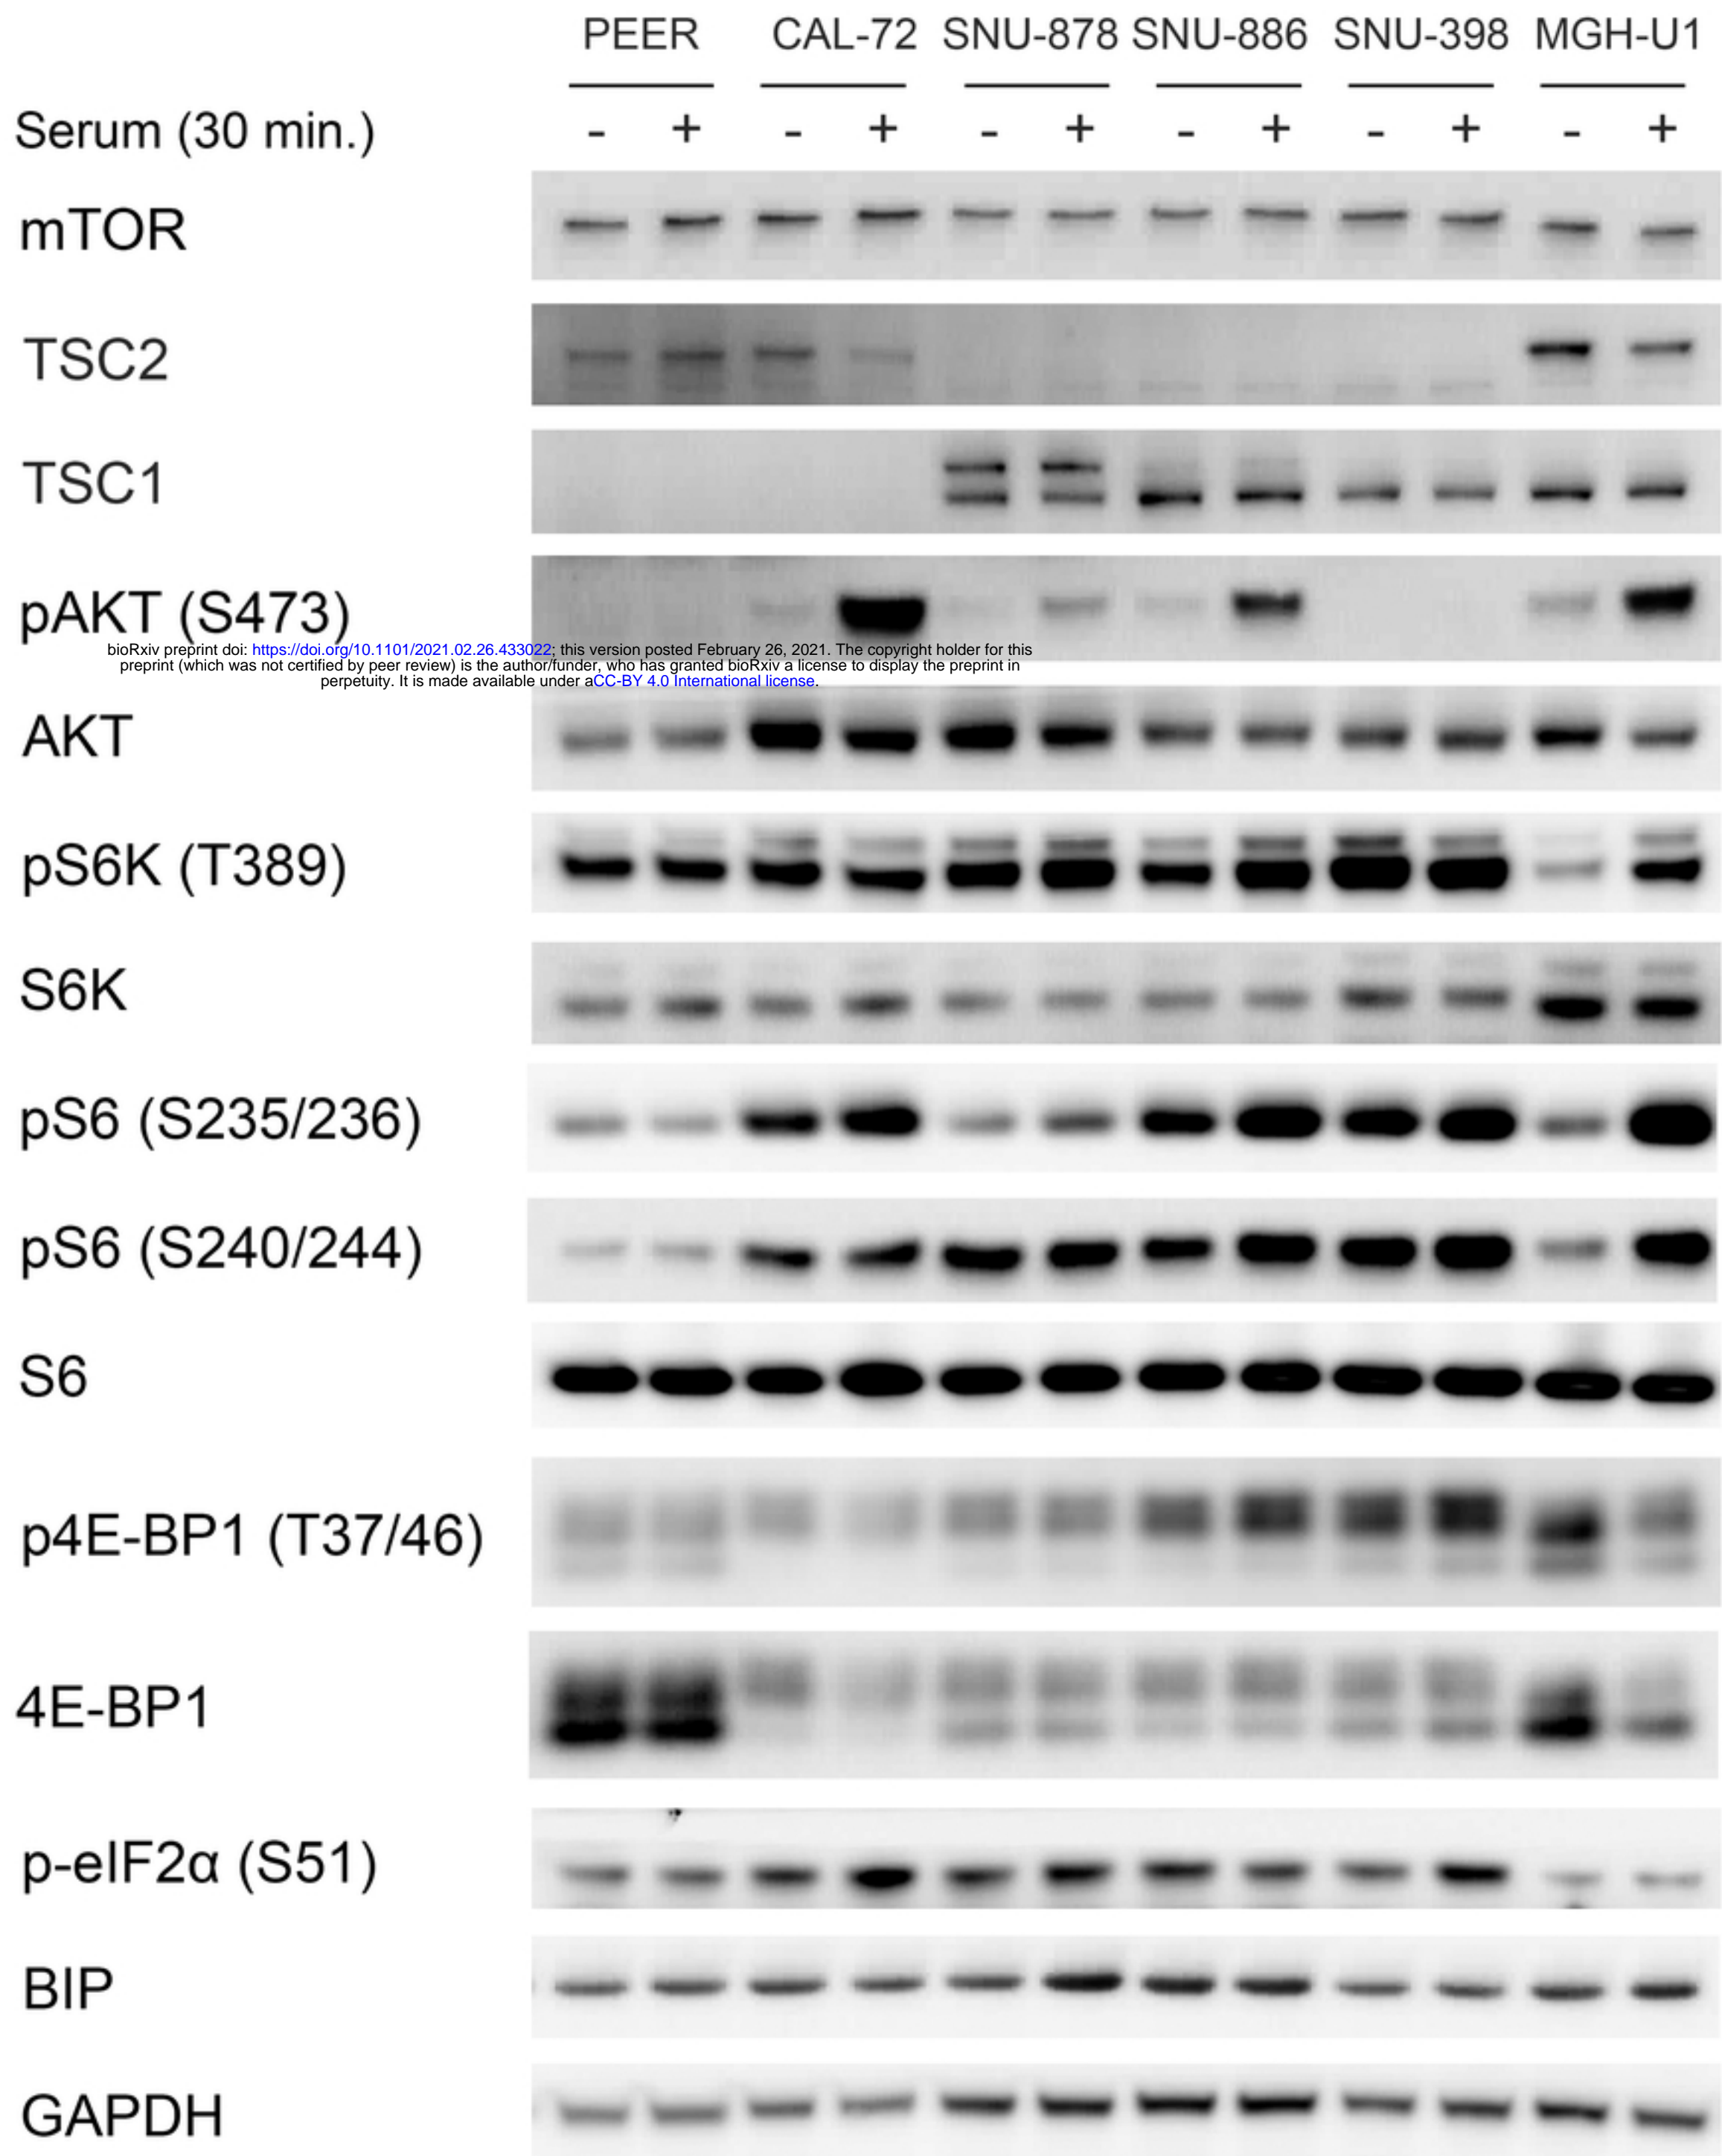

Figure 2

# Ganetespiib + Torin2/ Rapamycin

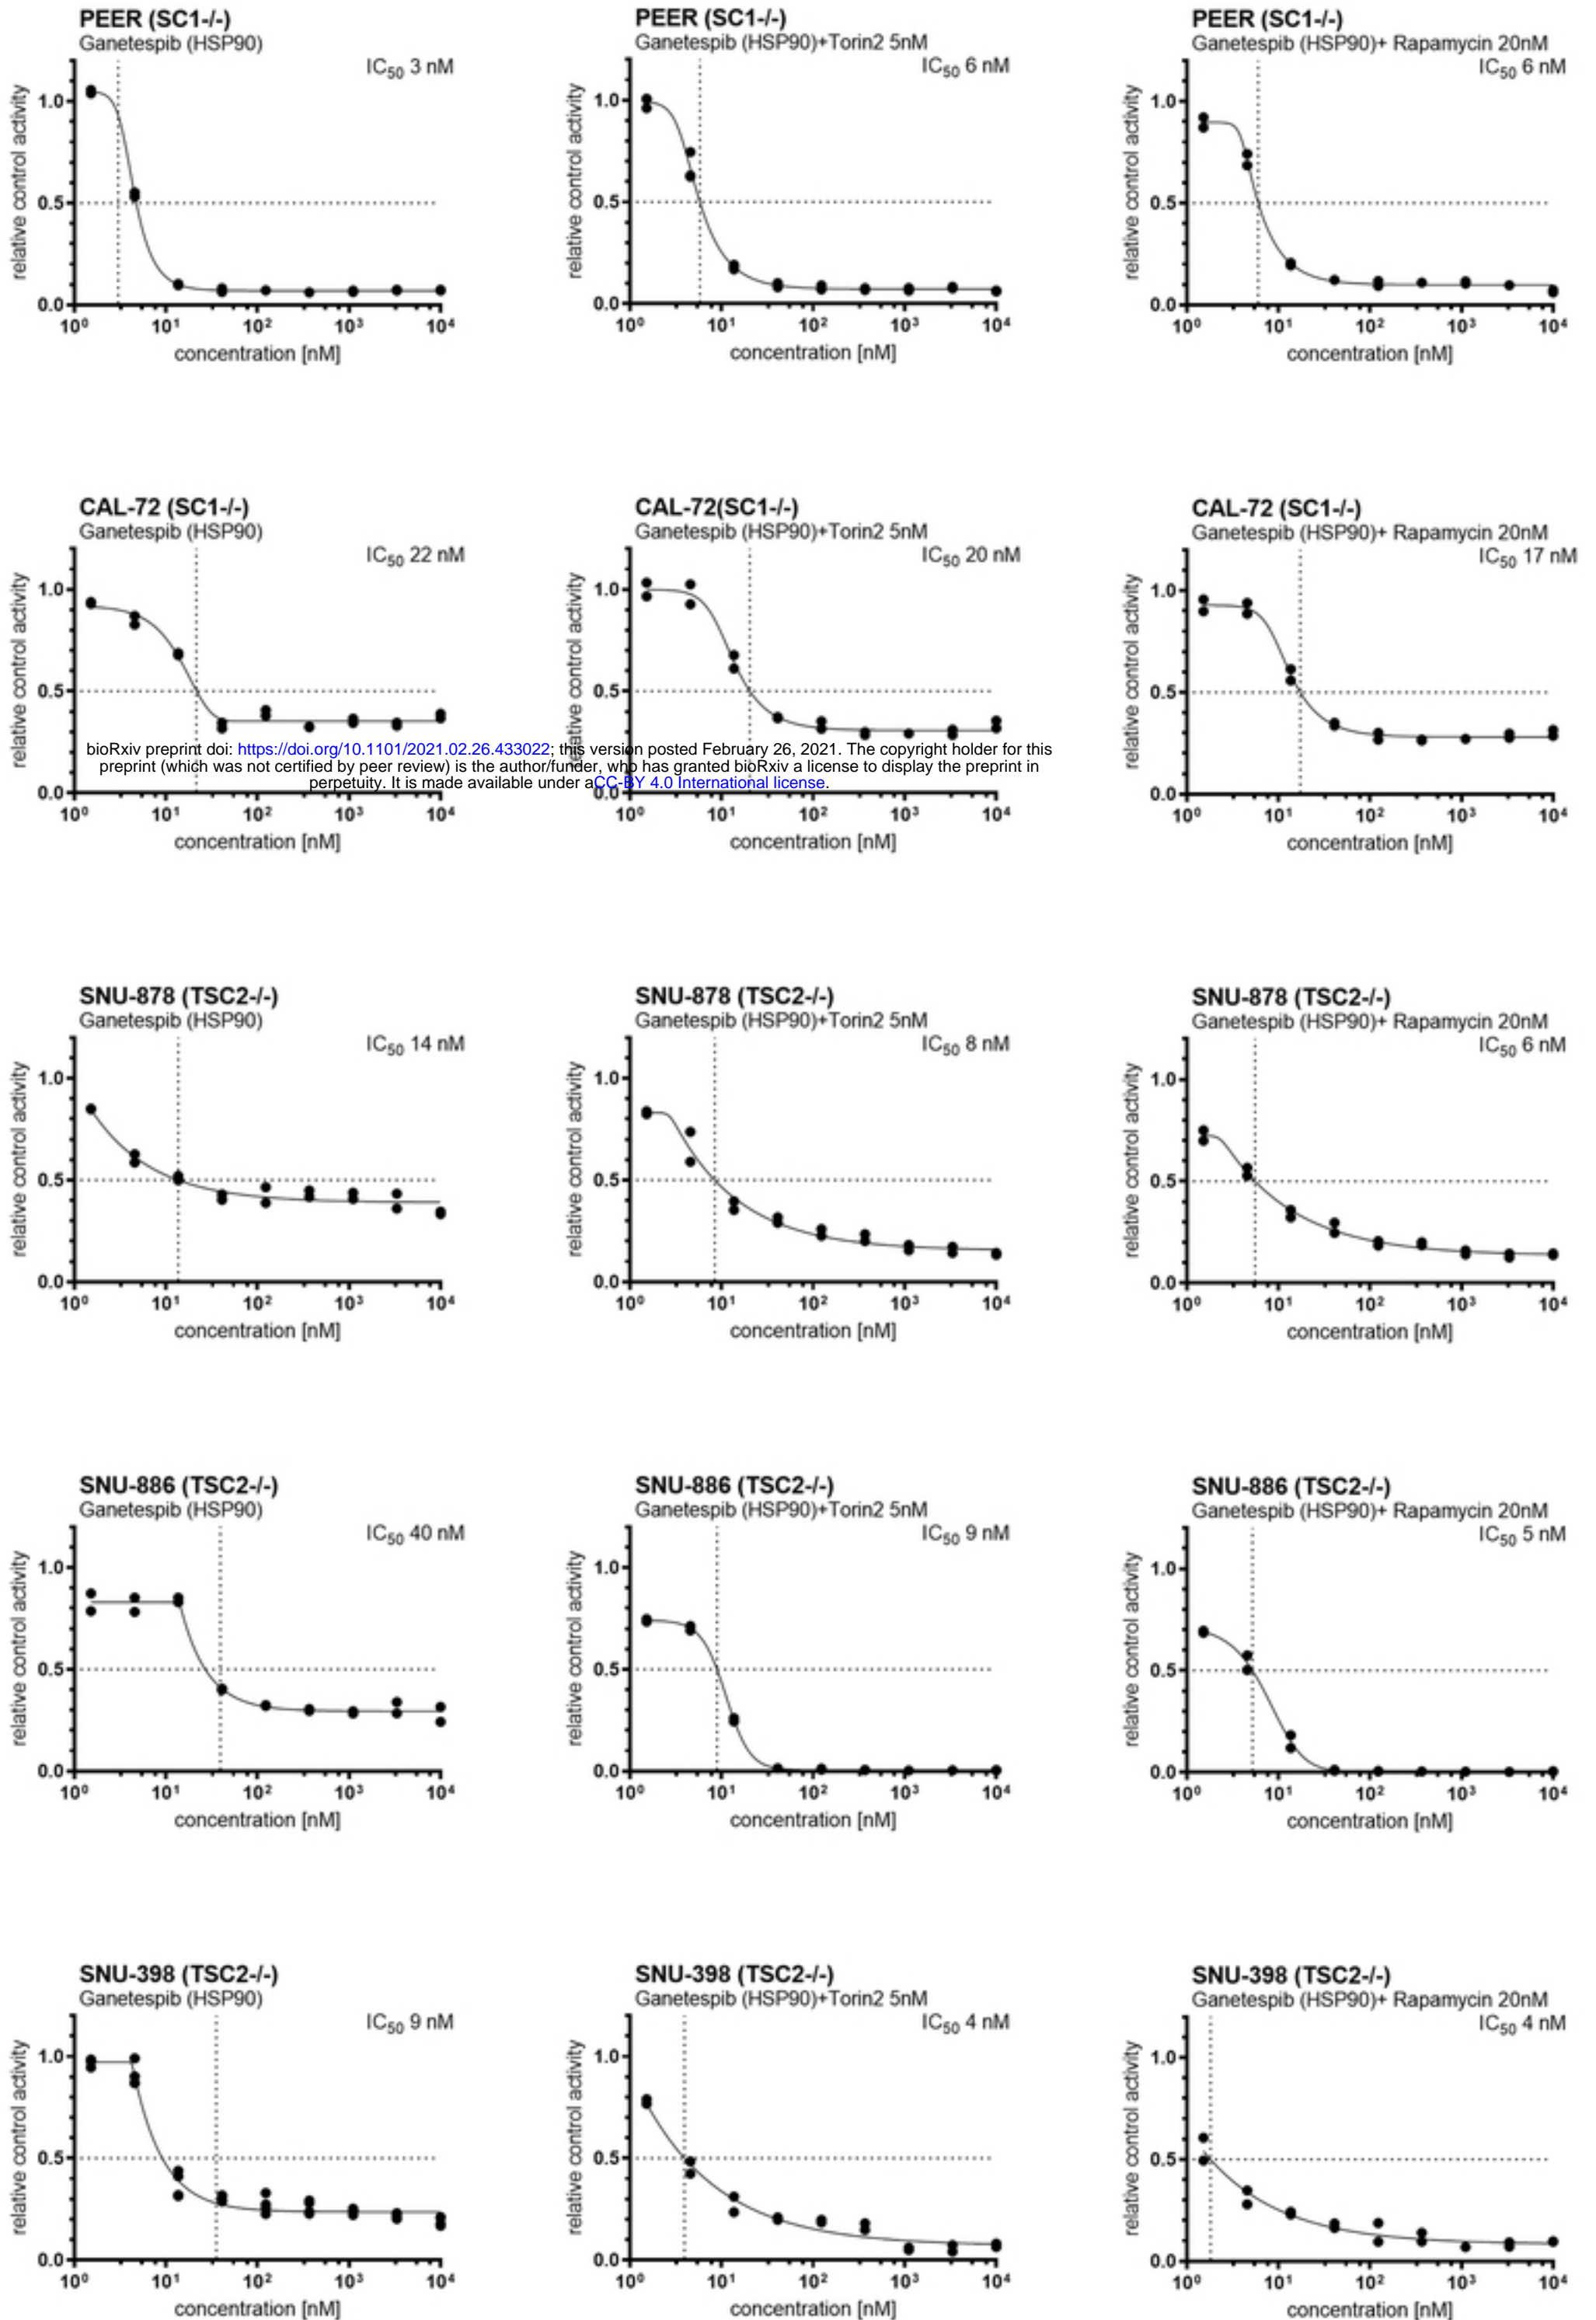

Figure 3

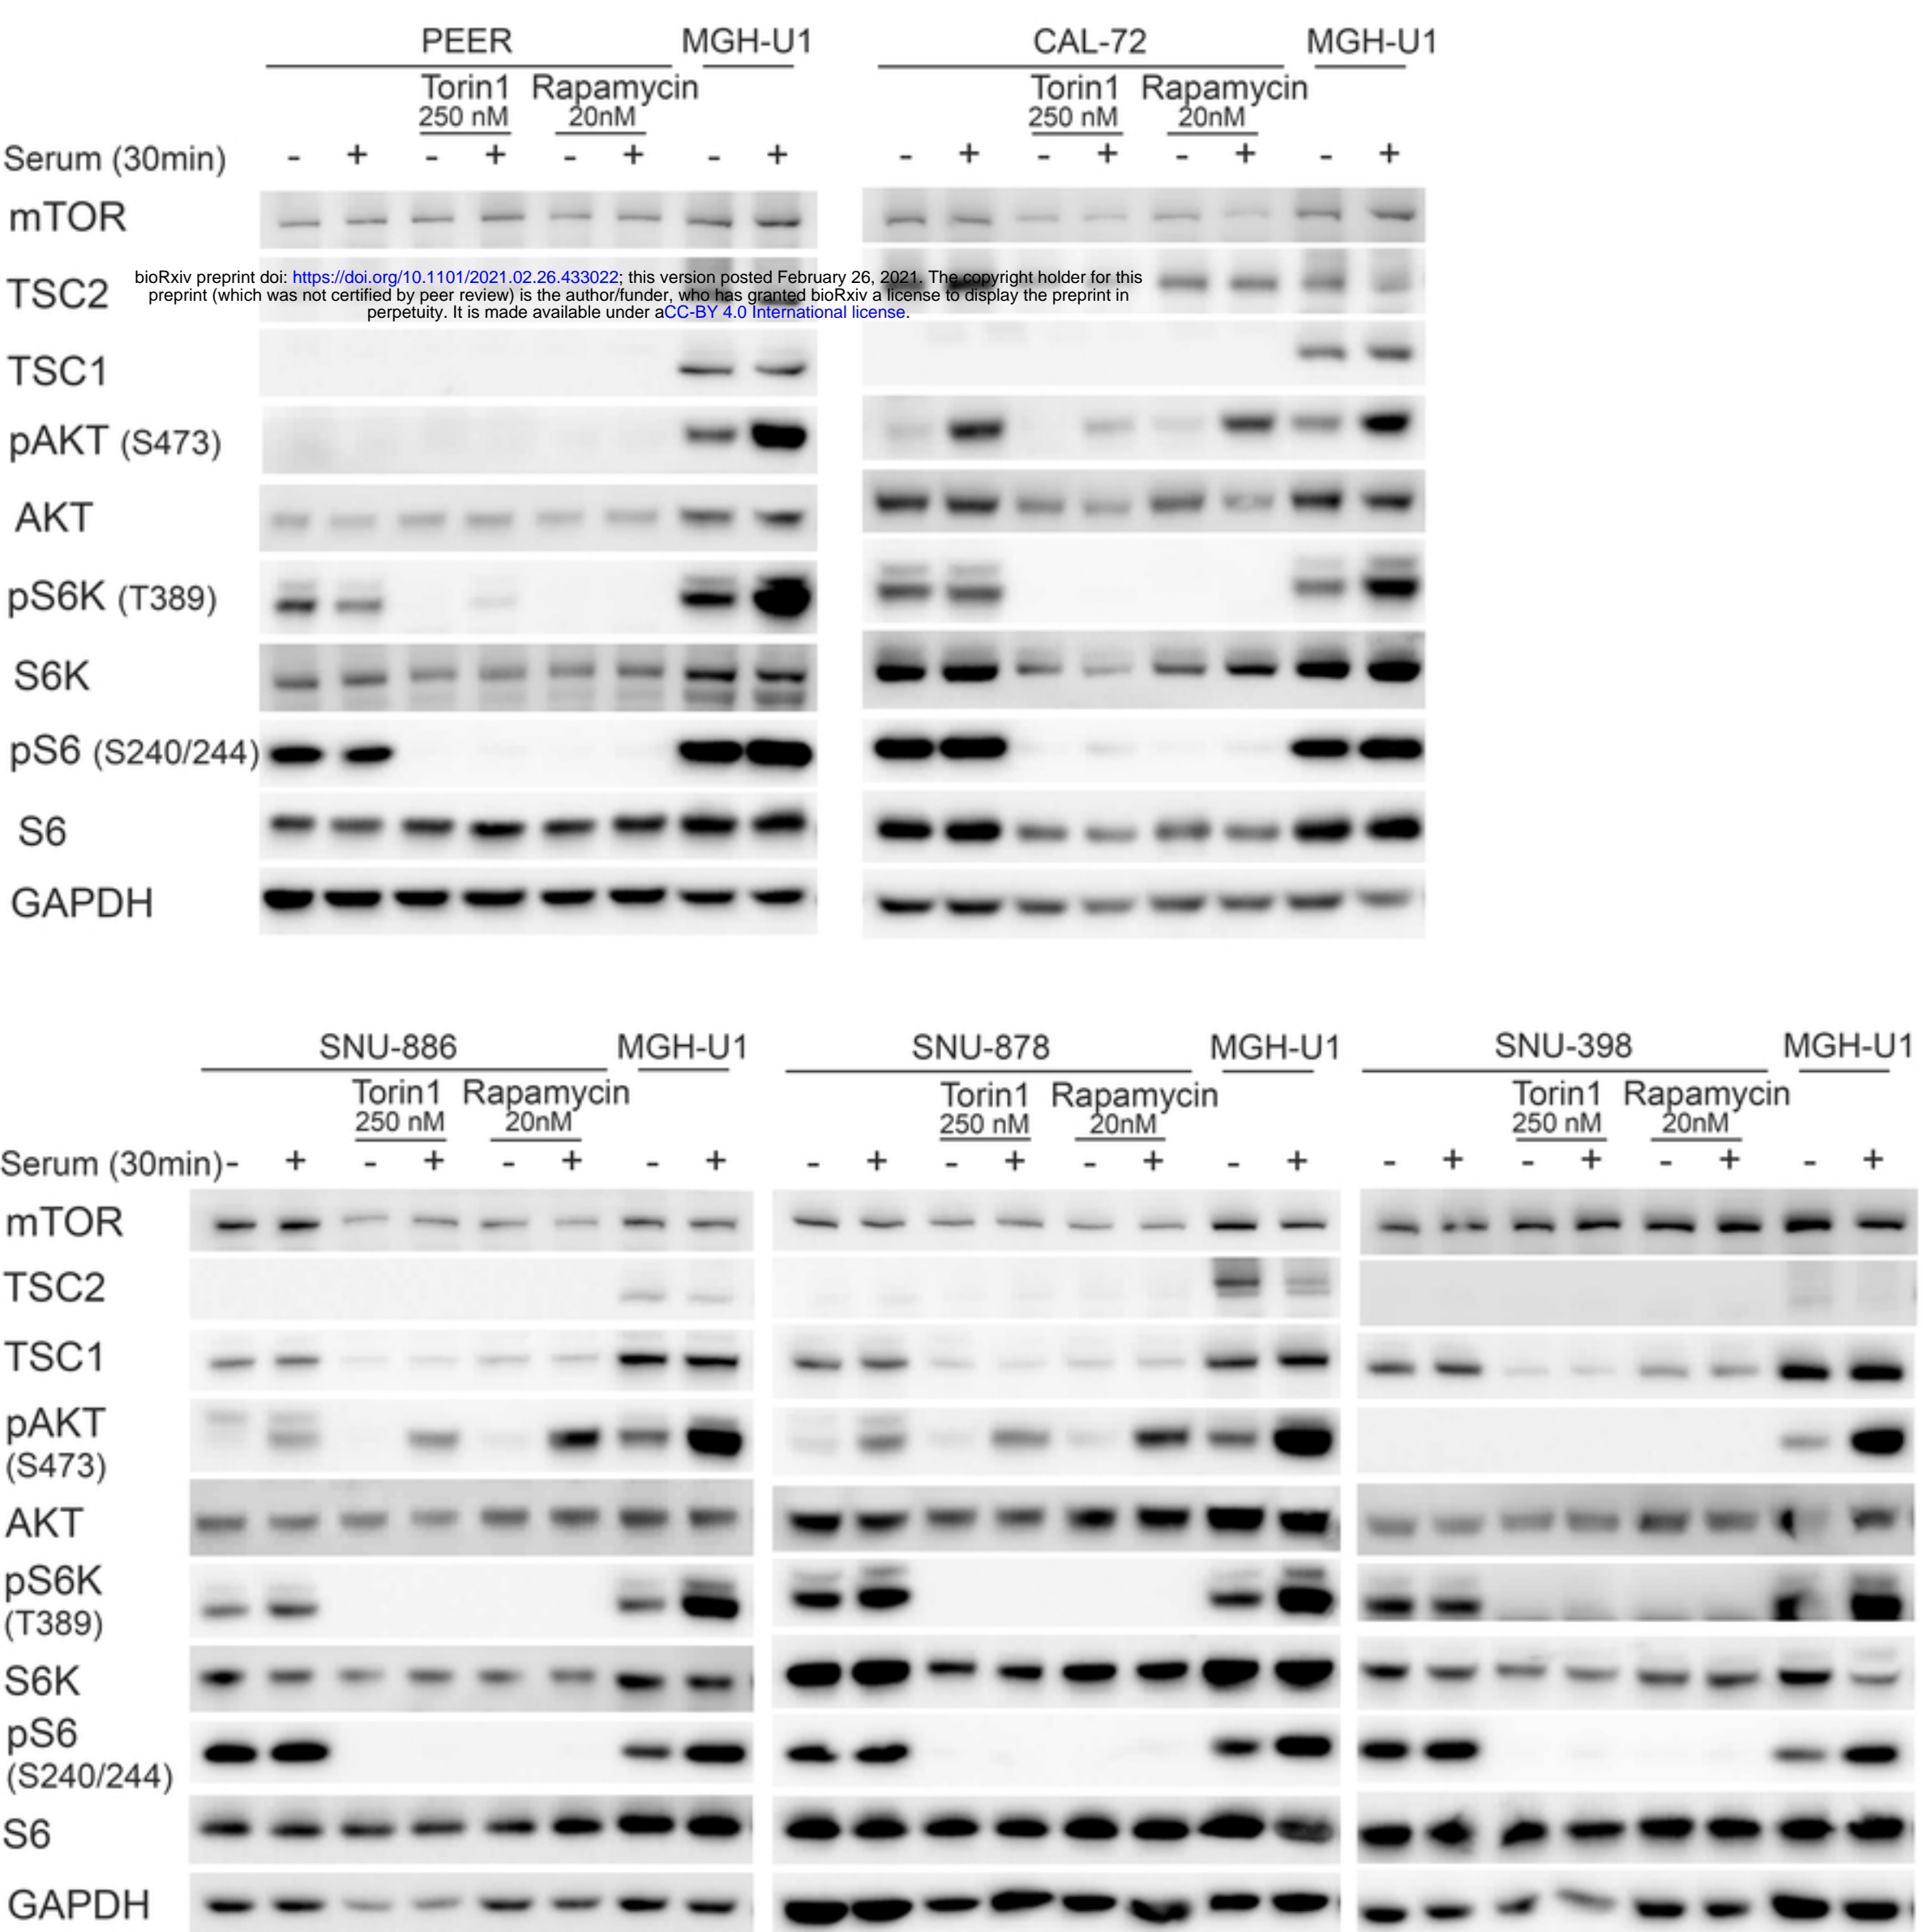

Figure 5

bioRxiv preprint doi: <https://doi.org/10.1101/2021.02.26.433022>; this version posted February 26, 2021. The copyright holder for this preprint (which was not certified by peer review) is the author/funder, who has granted bioRxiv a license to display the preprint in perpetuity. It is made available under aCC-BY 4.0 International license.

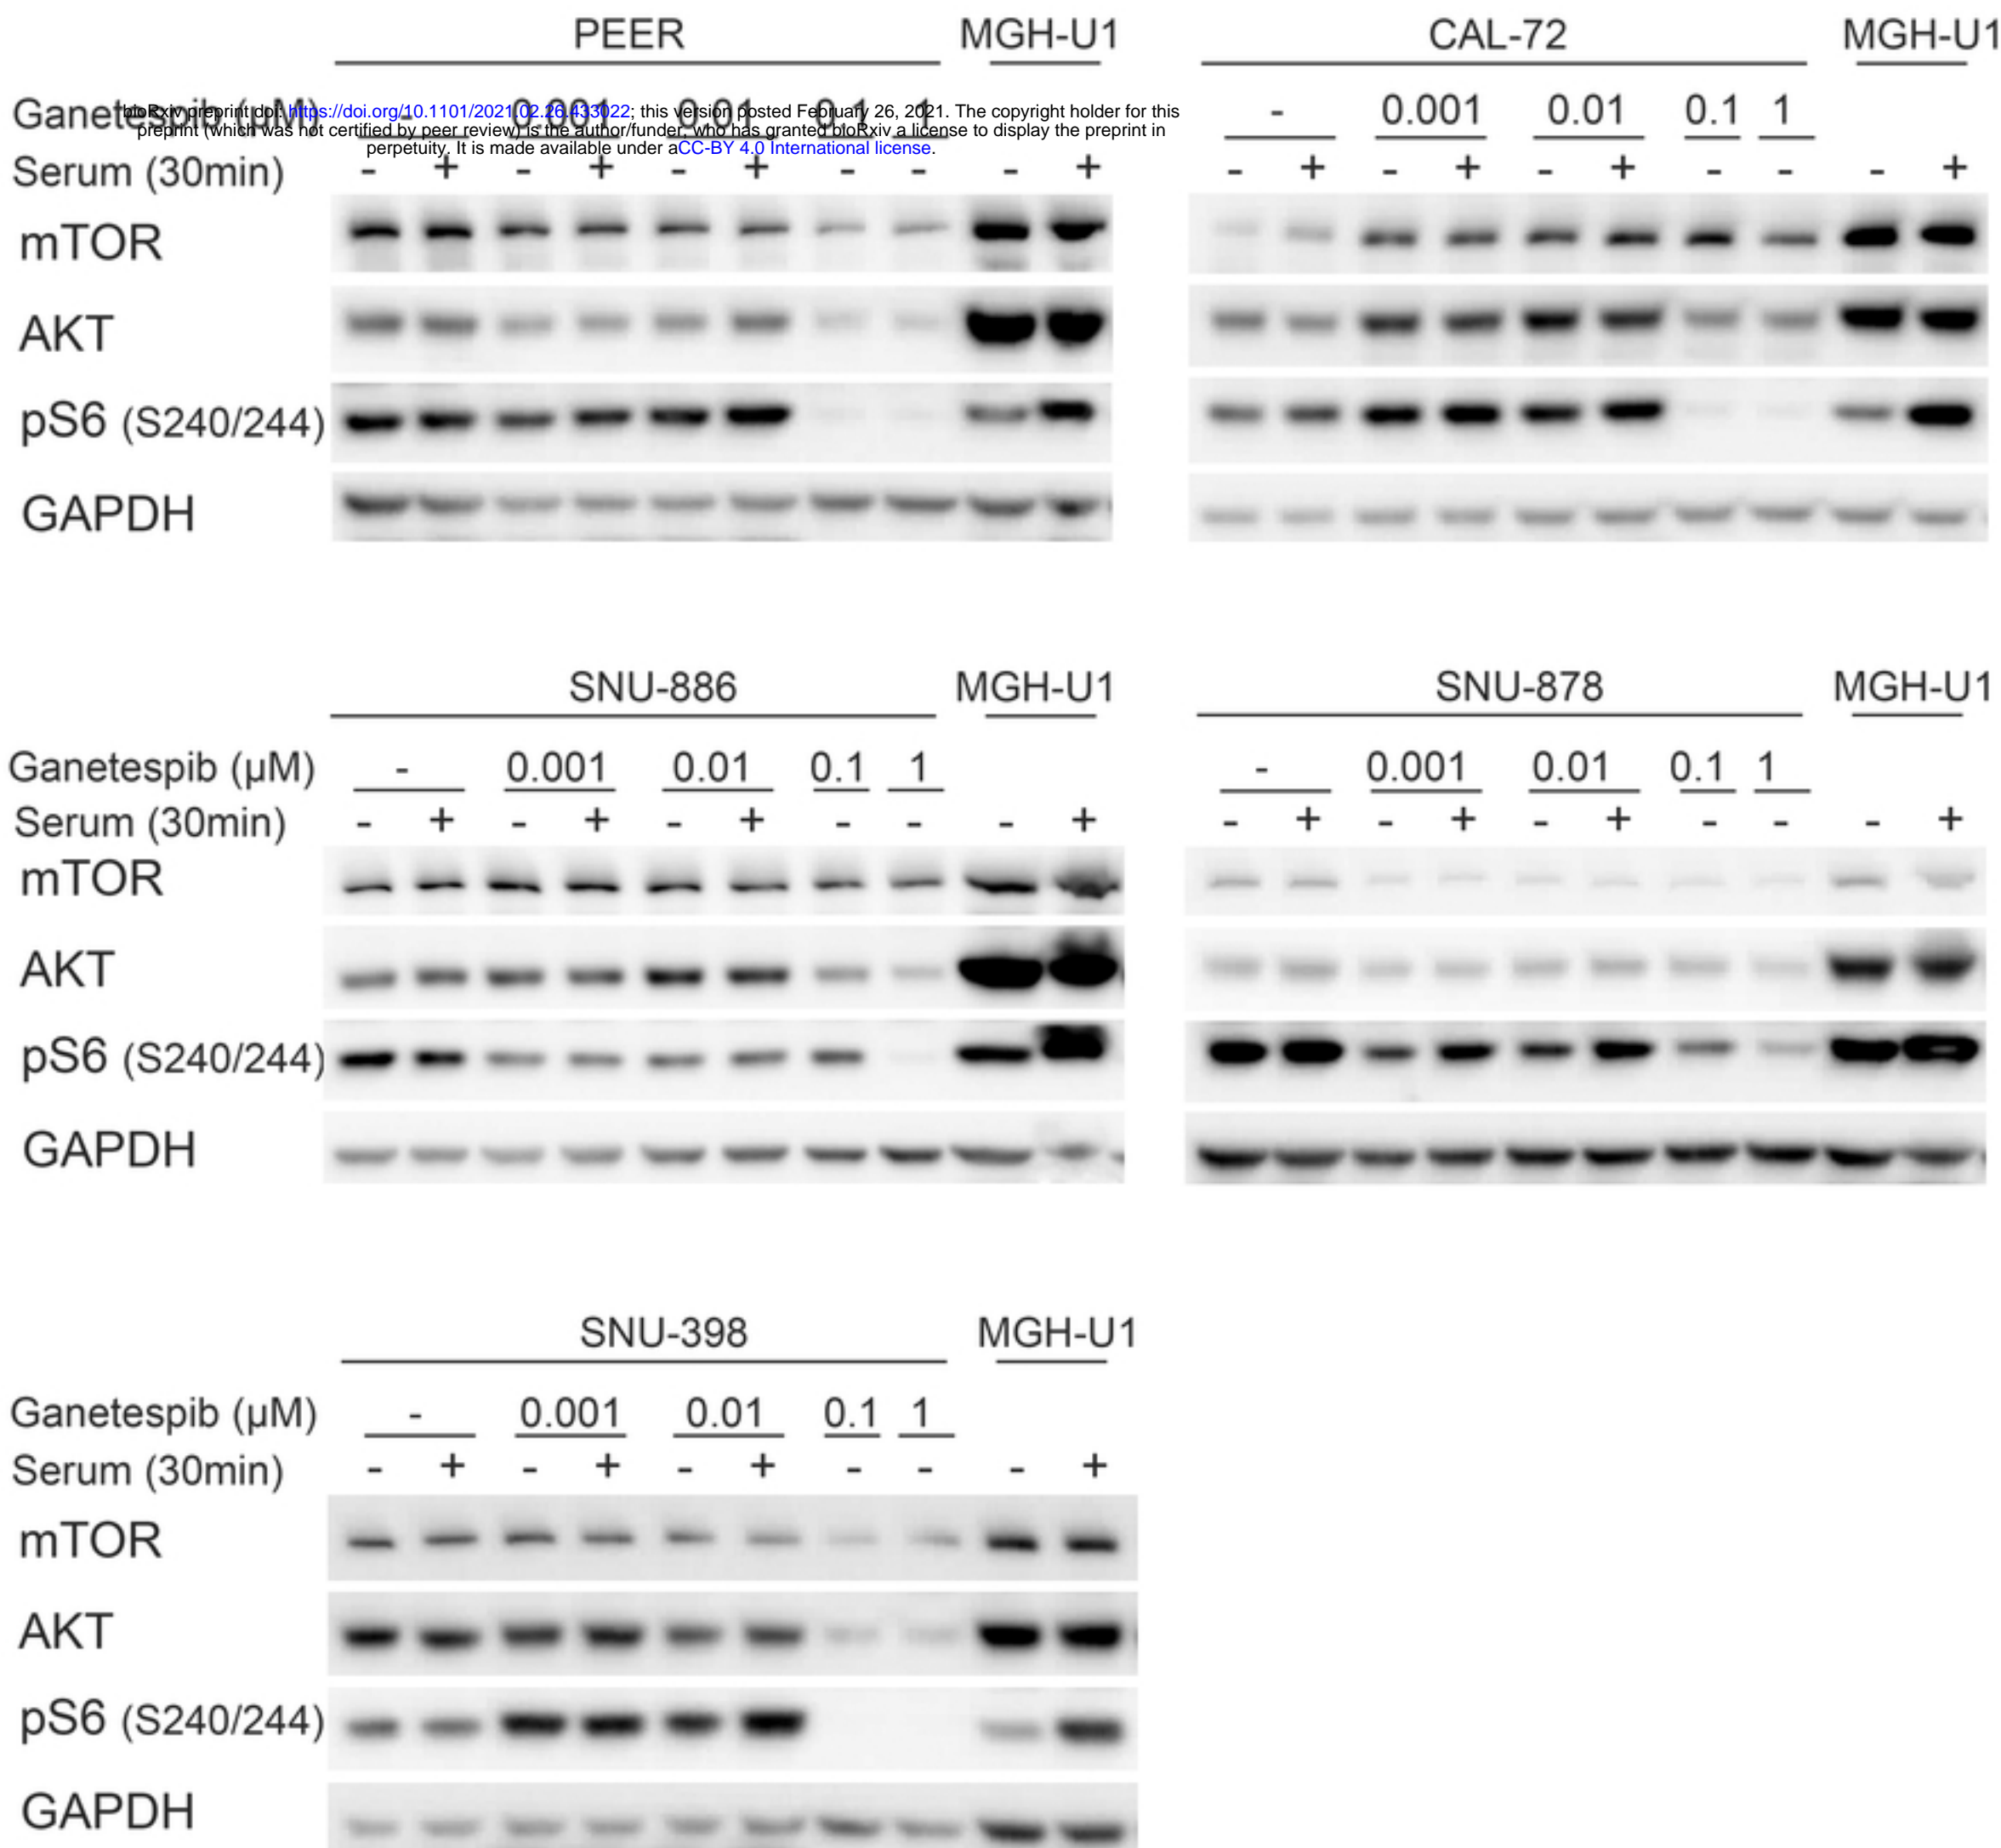

Figure 6

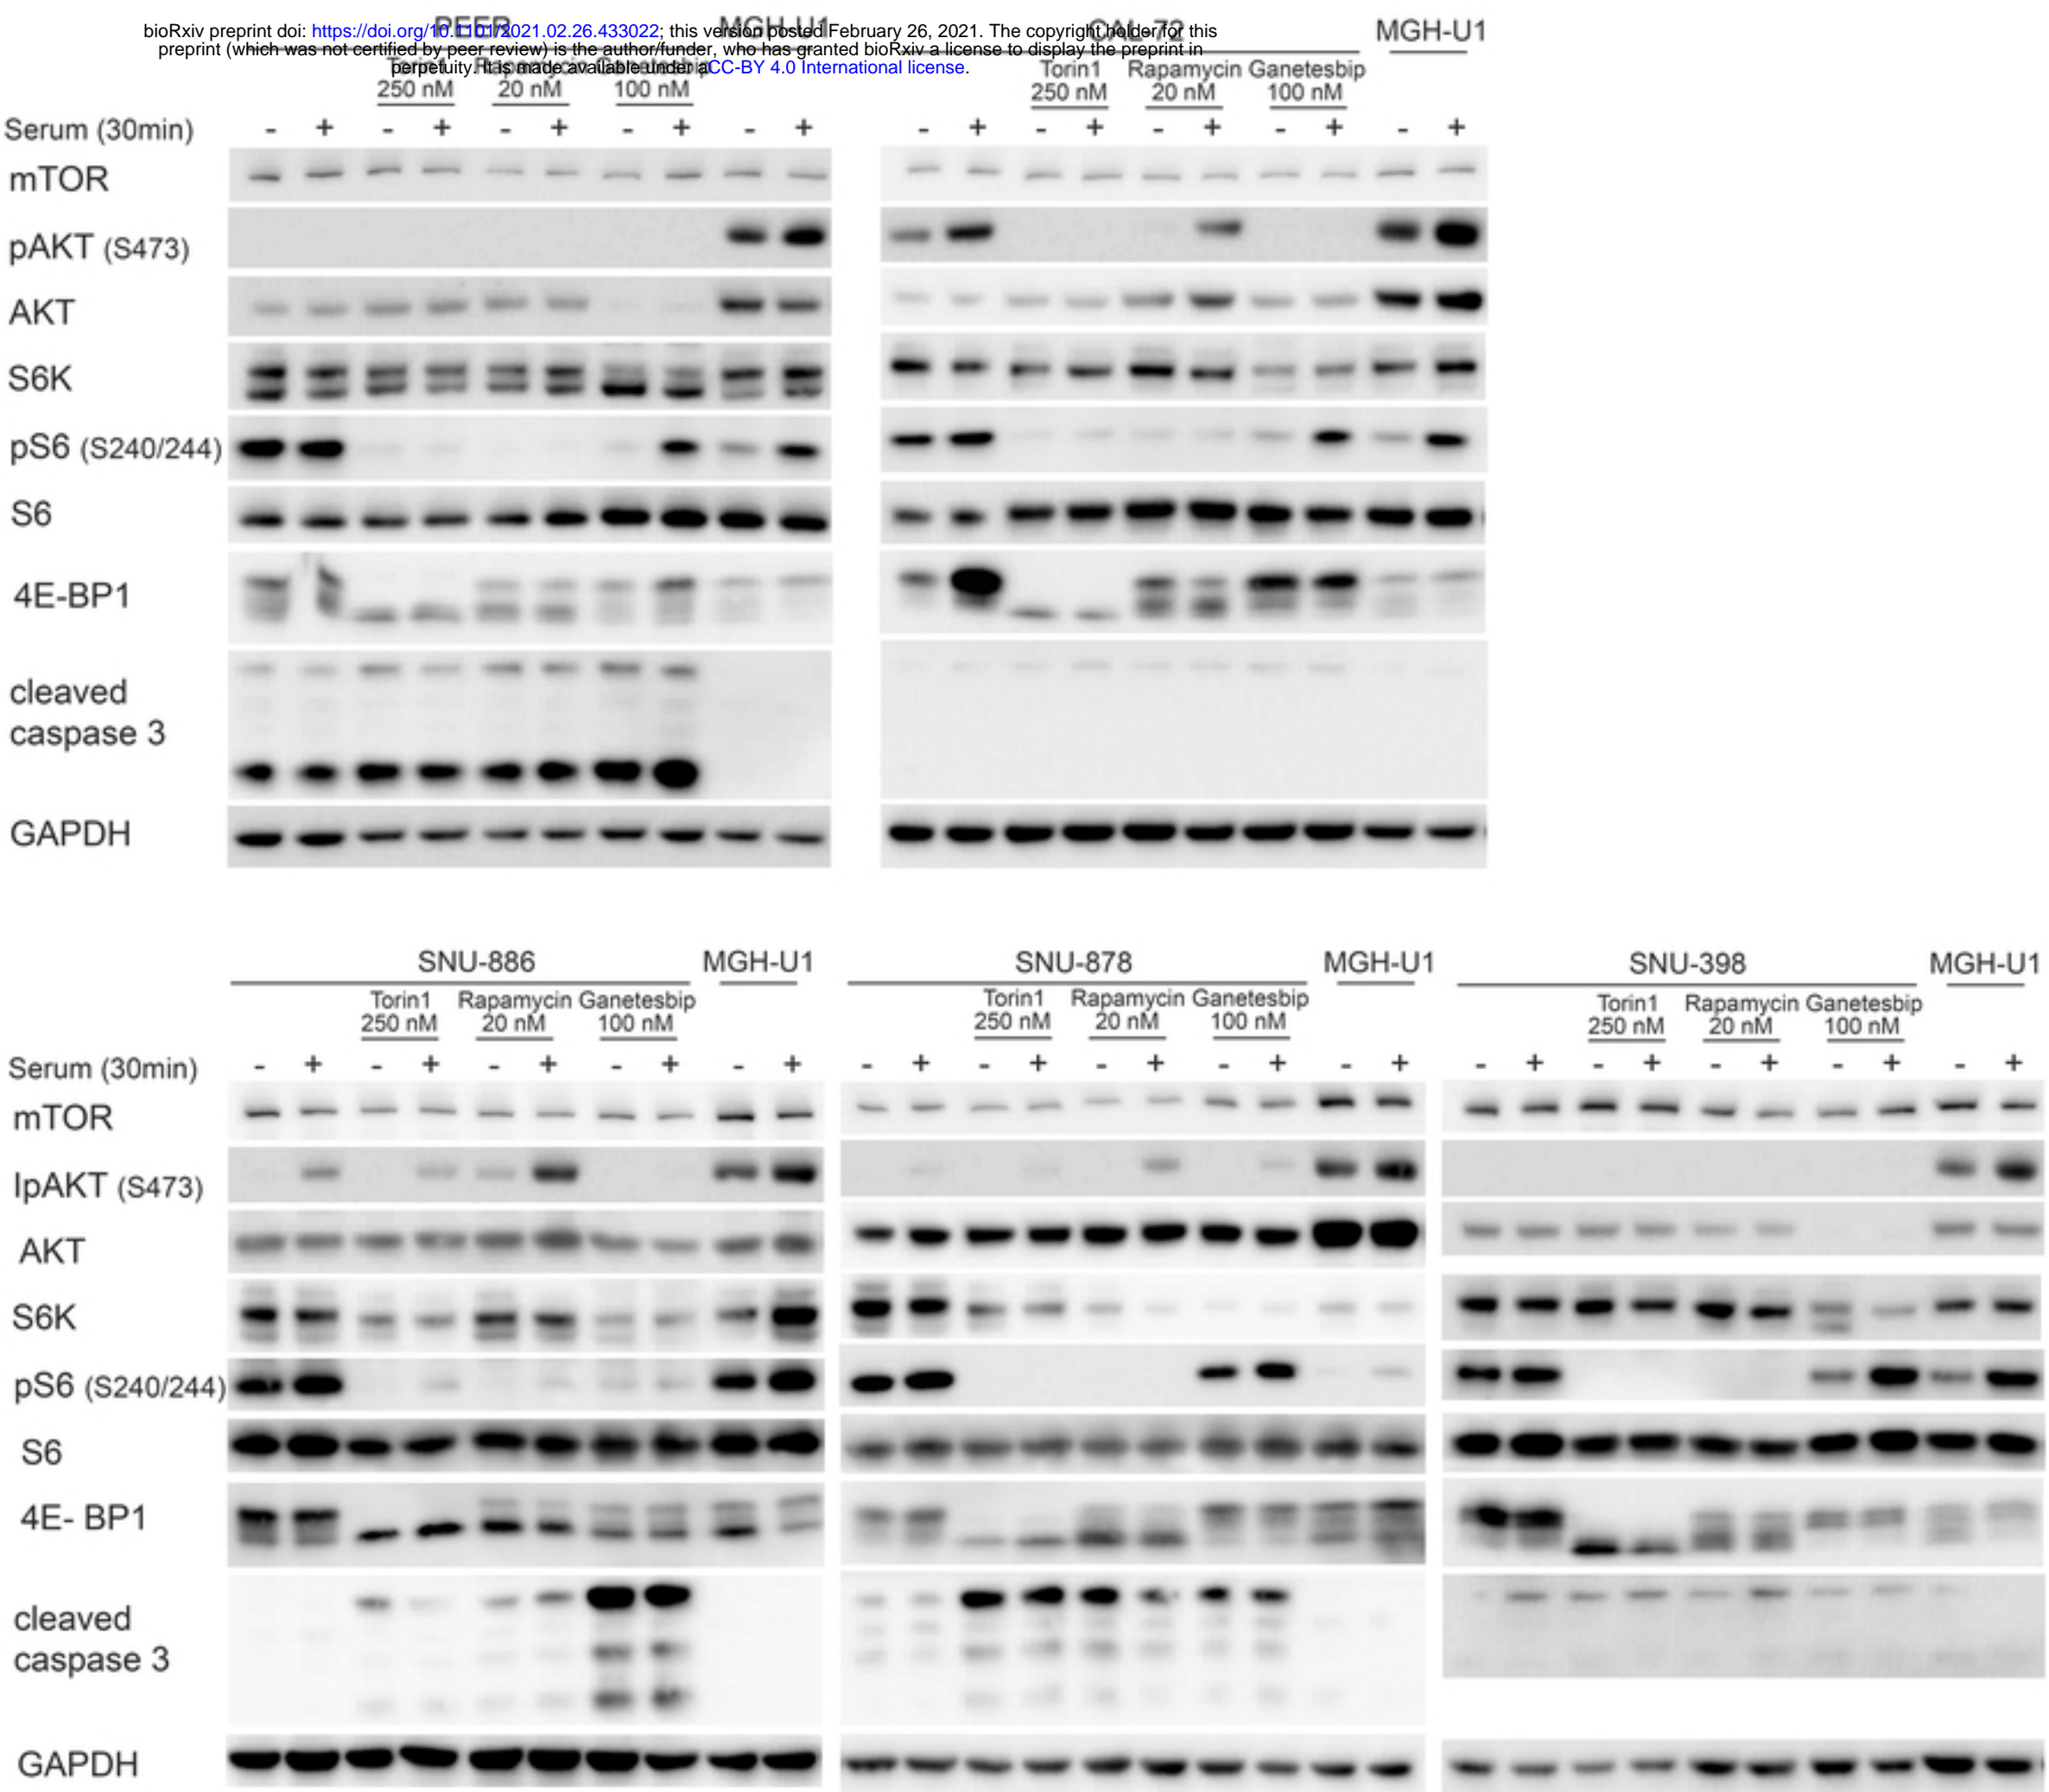

Figure 7



vehicle (6h)

Rapamycin (6h)

INK 128 (6h)

Ganetespib (24h)

H&E

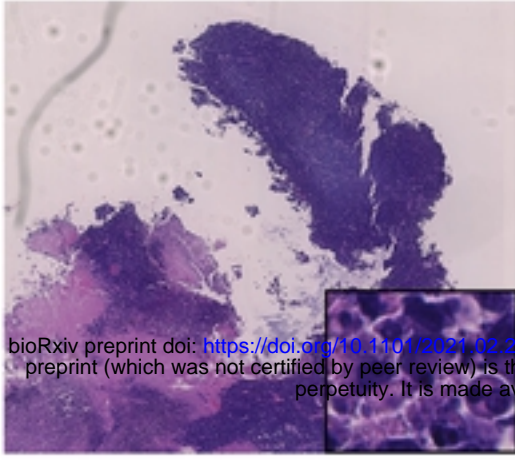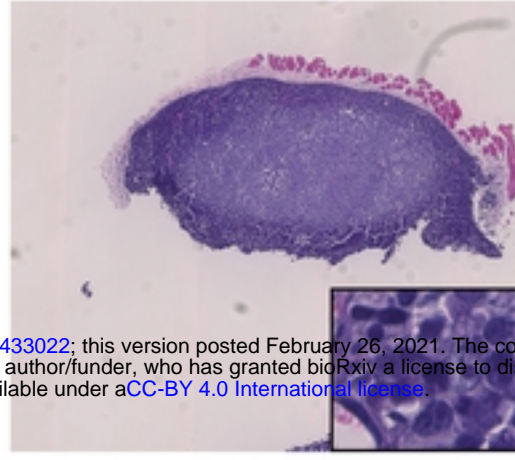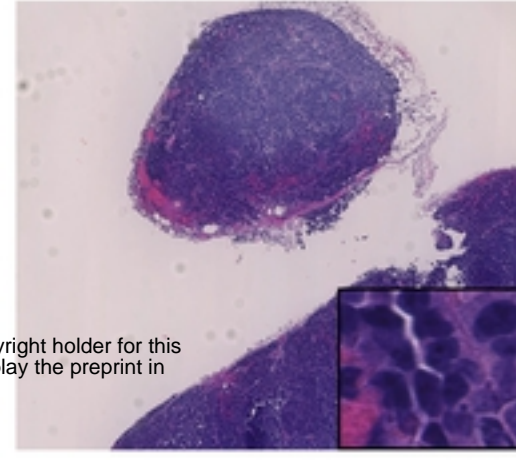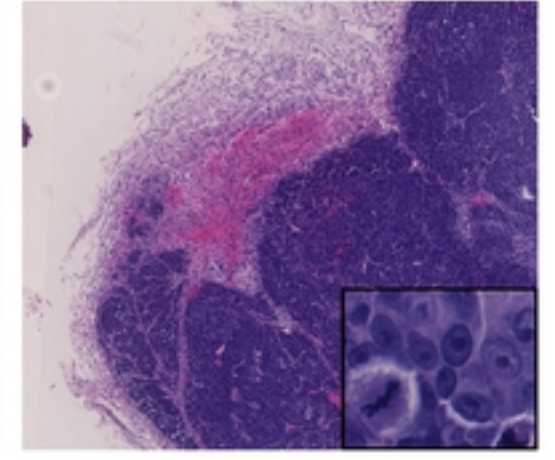

bioRxiv preprint doi: <https://doi.org/10.1101/2021.02.26.433022>; this version posted February 26, 2021. The copyright holder for this preprint (which was not certified by peer review) is the author/funder, who has granted bioRxiv a license to display the preprint in perpetuity. It is made available under aCC-BY 4.0 International license.

TSC2

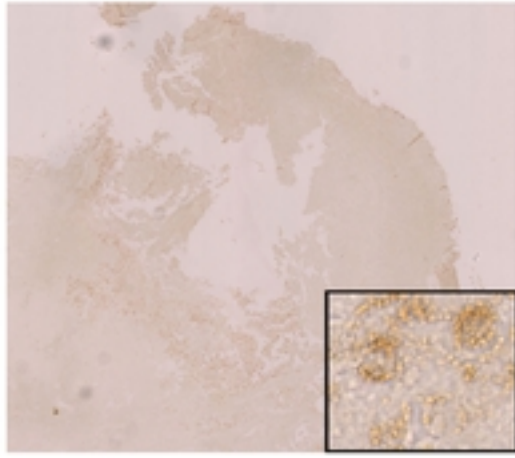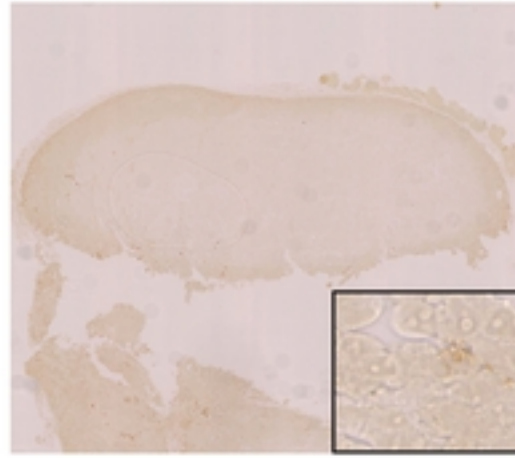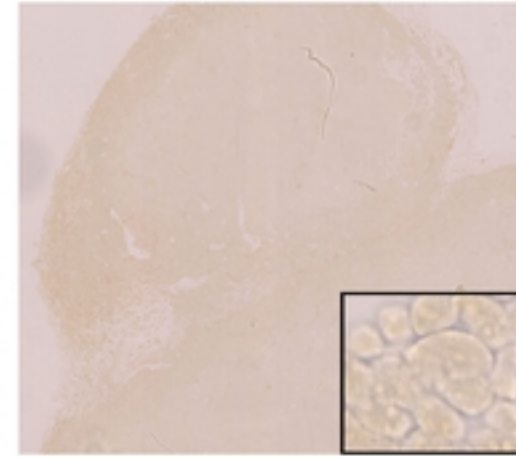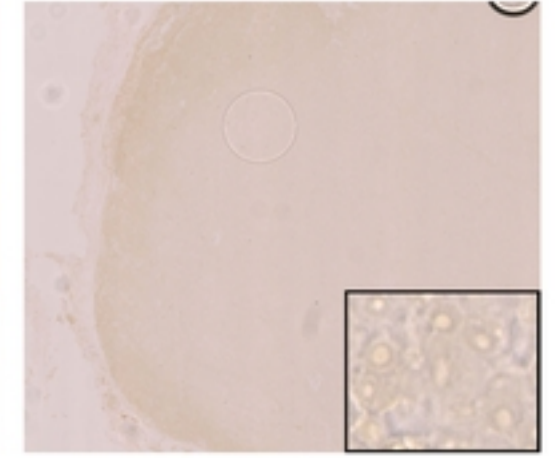

pS6 (S235/236)

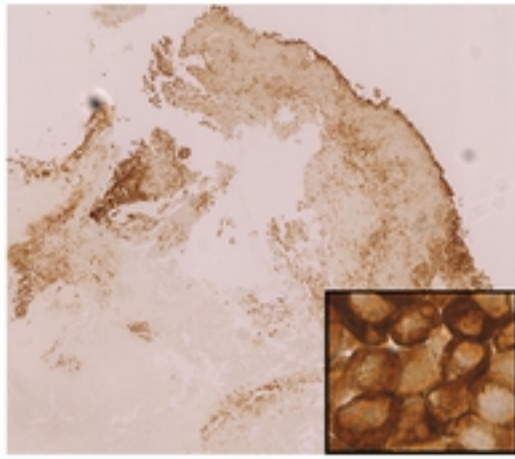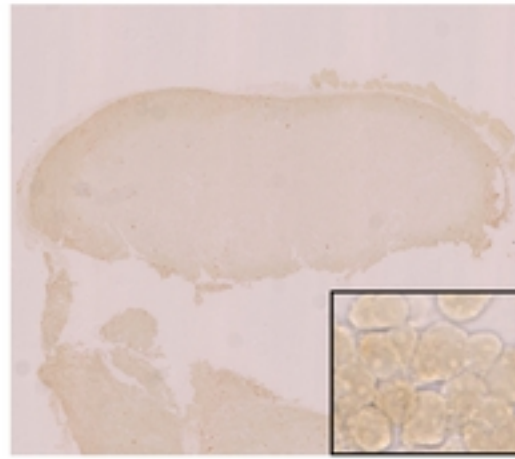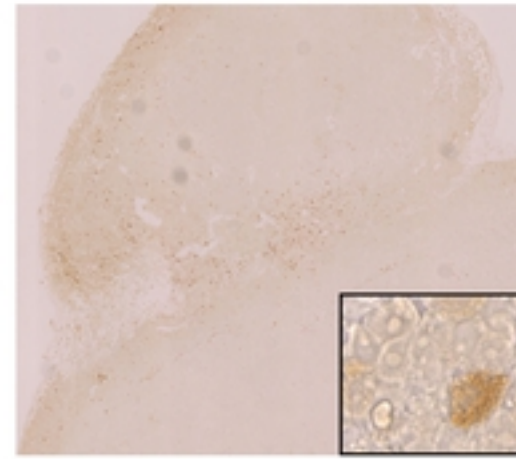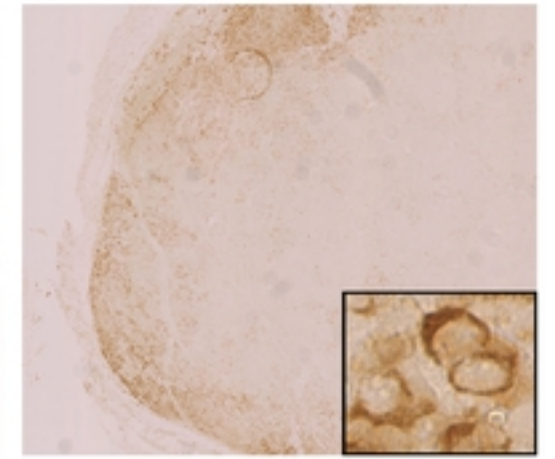

PCNA

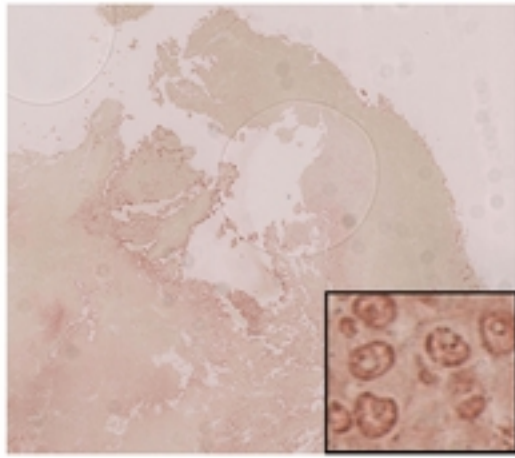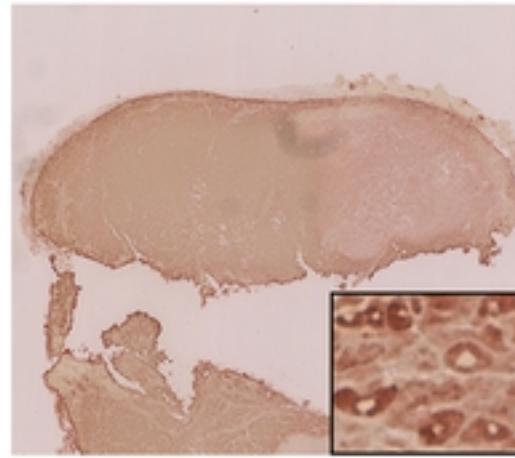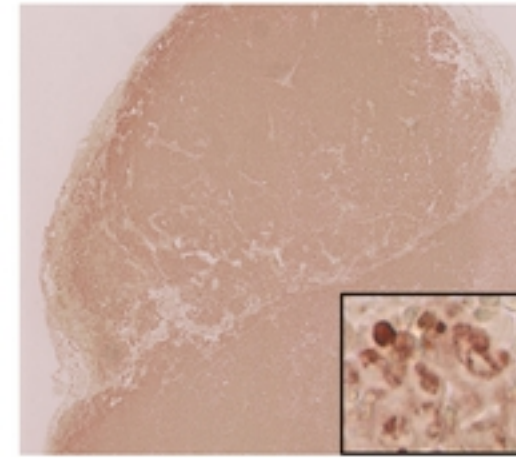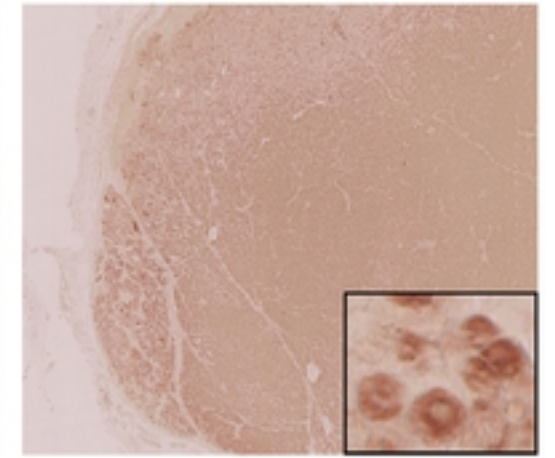

ApopTag

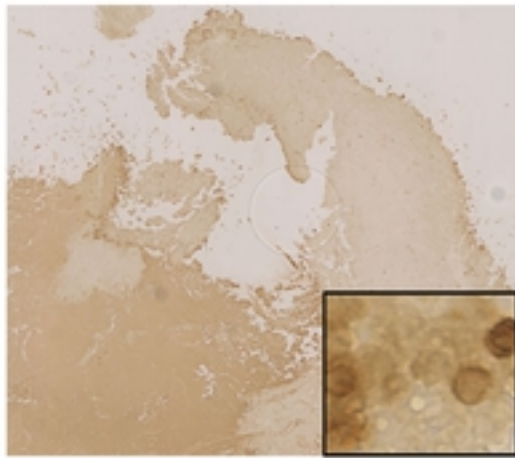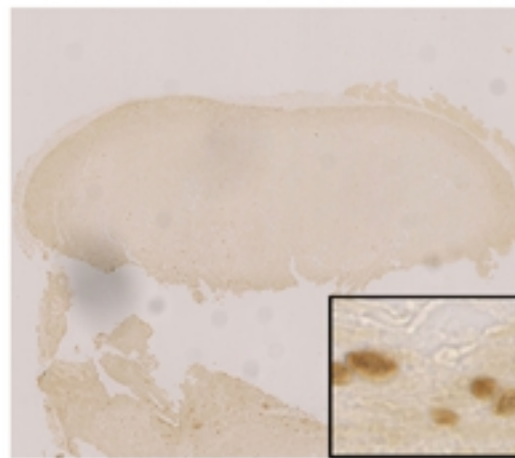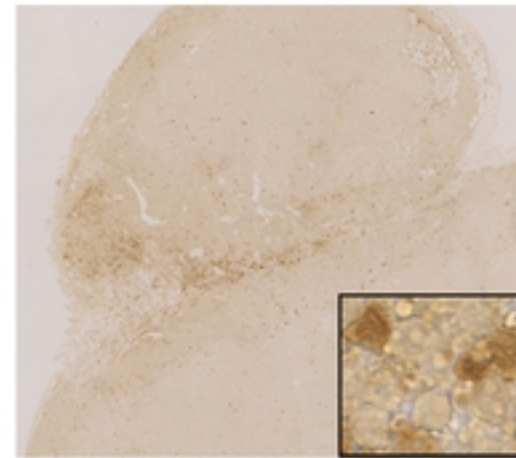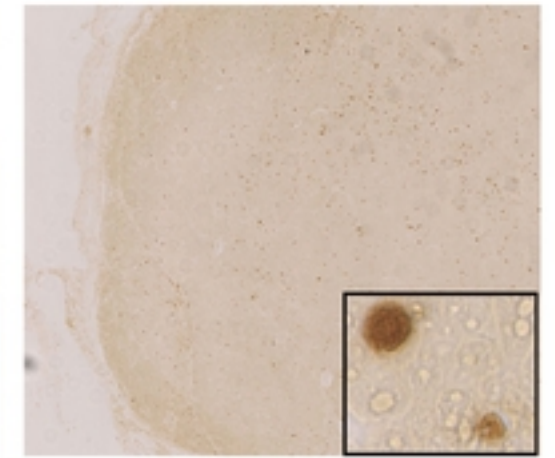

Figure 9

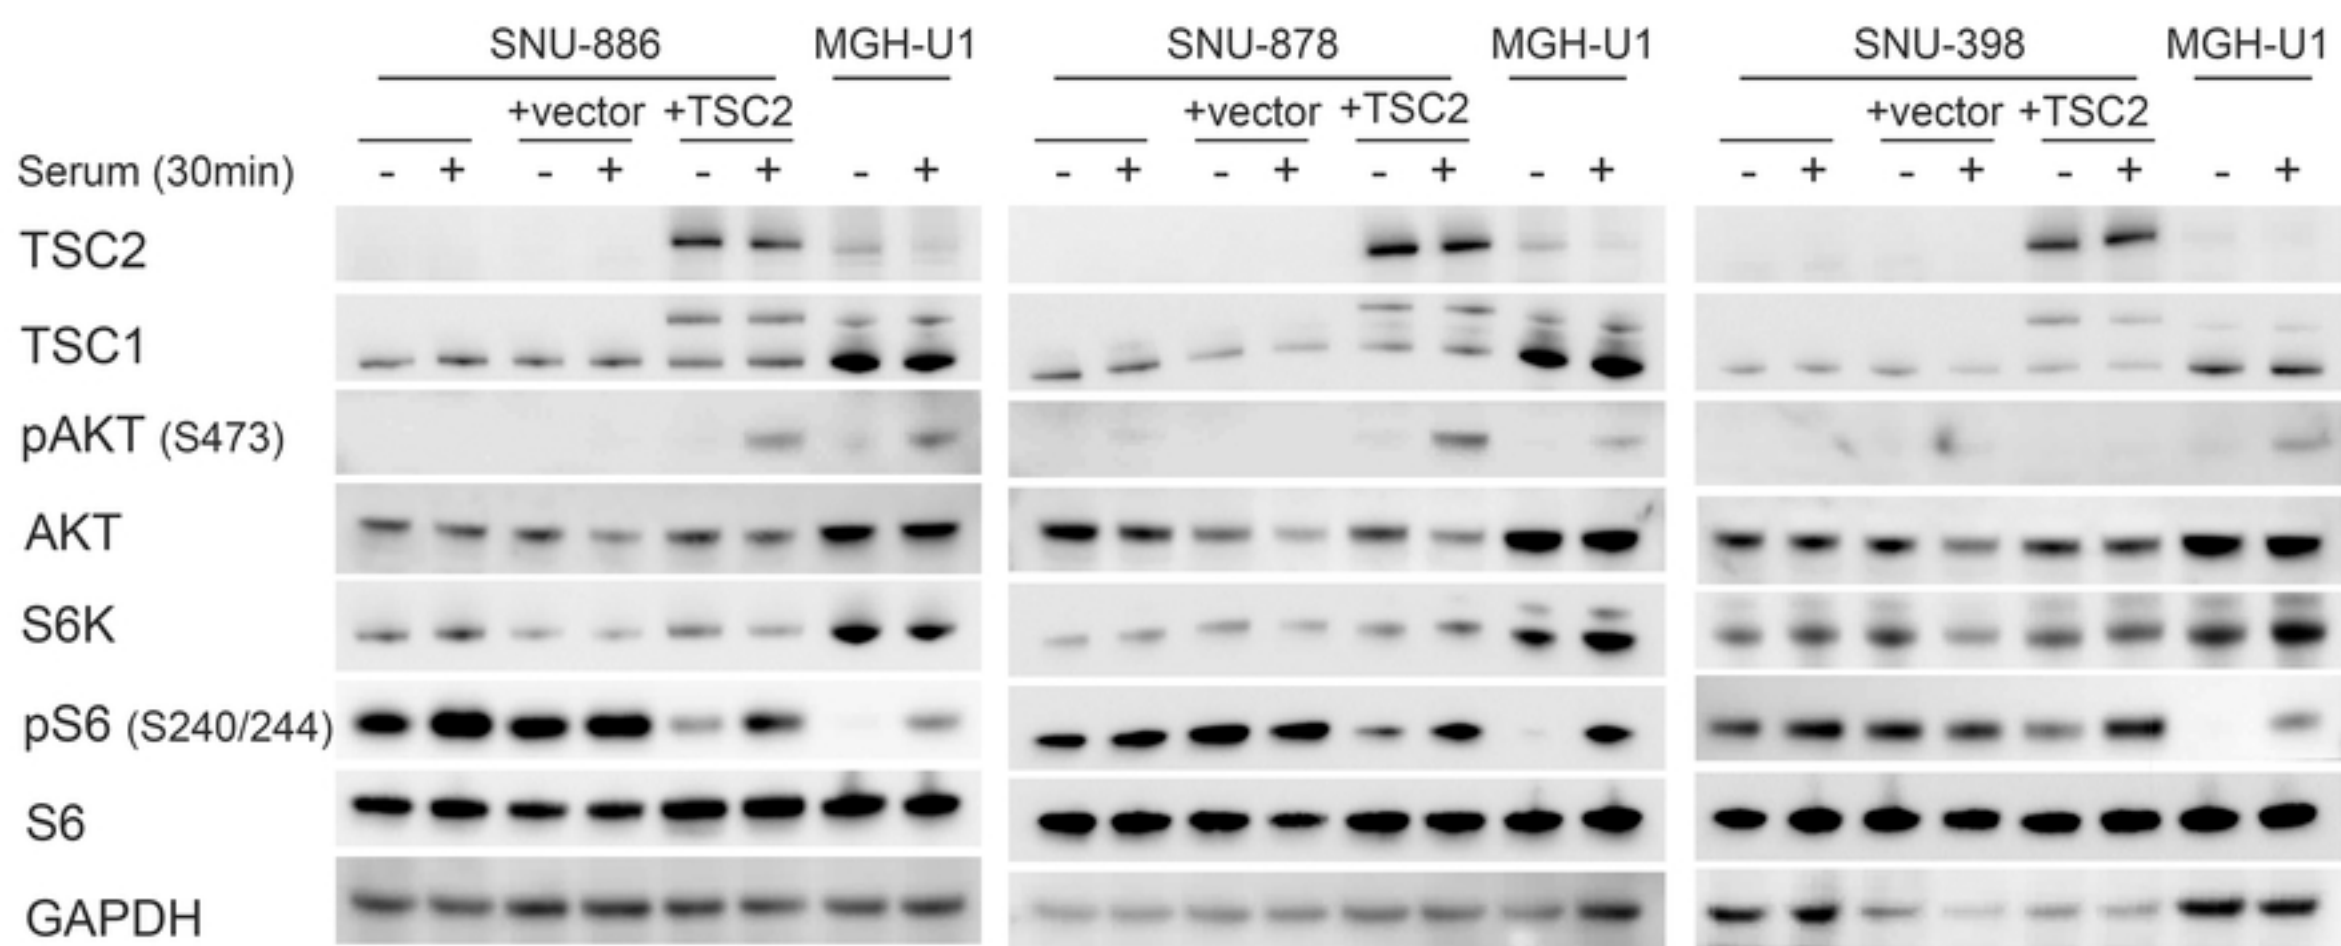

Figure 4

**a treatment: Ganetespib, INK 128 and Rapamycin**

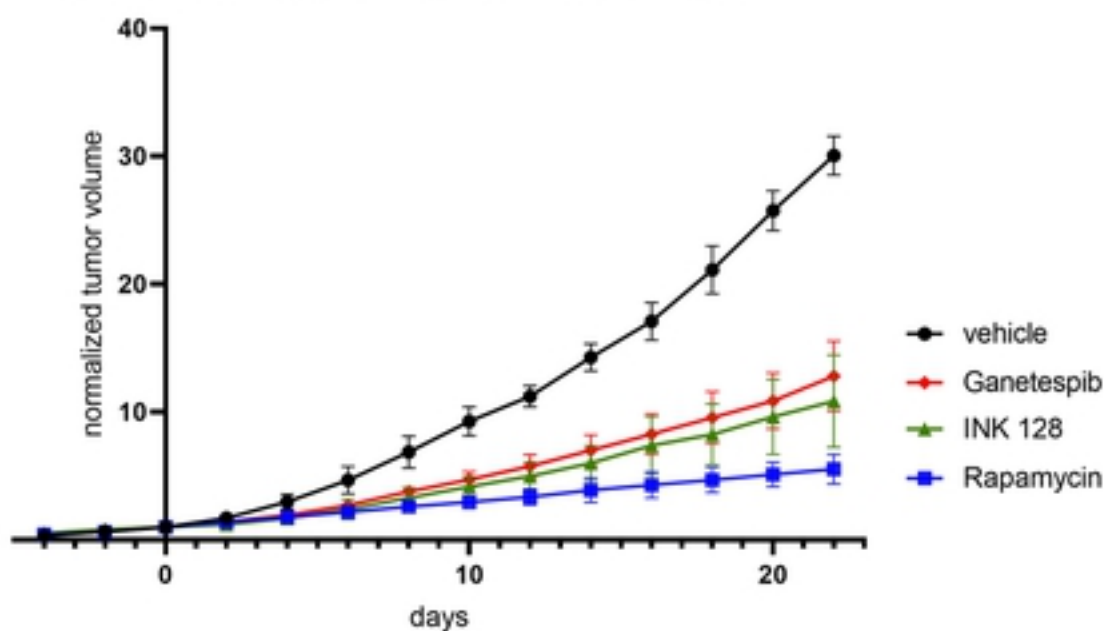

**b tumor size after 22 days of treatment**

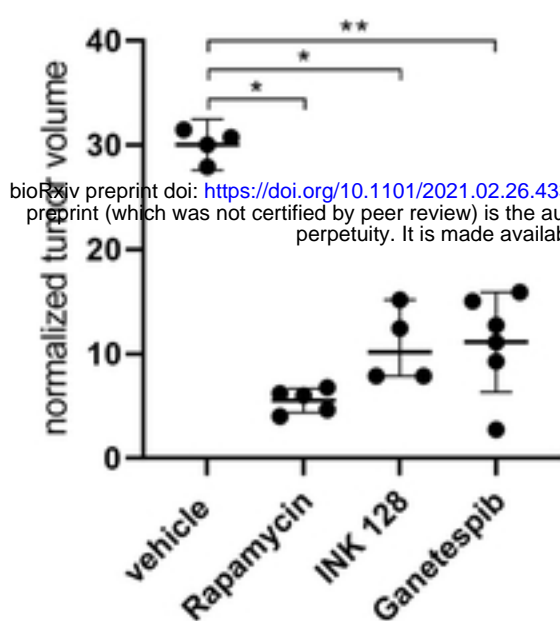

bioRxiv preprint doi: <https://doi.org/10.1101/2021.02.26.433022>; this version posted February 26, 2021. The copyright holder for this preprint (which was not certified by peer review) is the author/funder, who has granted bioRxiv a license to display the preprint in perpetuity. It is made available under aCC-BY 4.0 International license.

**c treatment: Ganetespib, INK 128 and both combined**

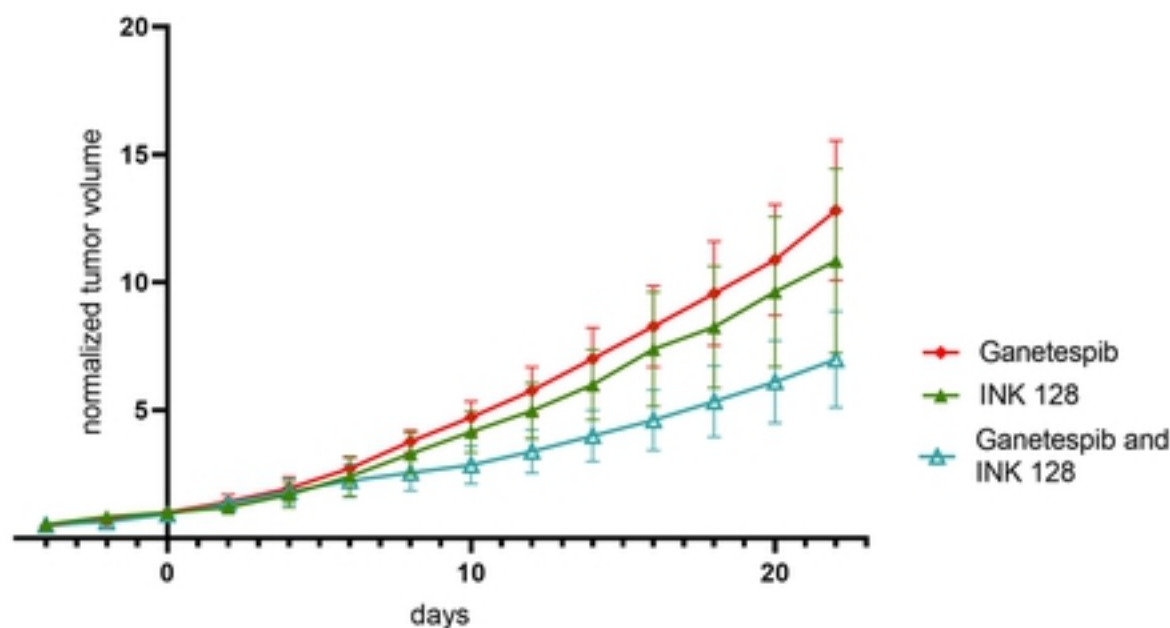

**d treatment: Ganetespib, Rapamycin and both combined**

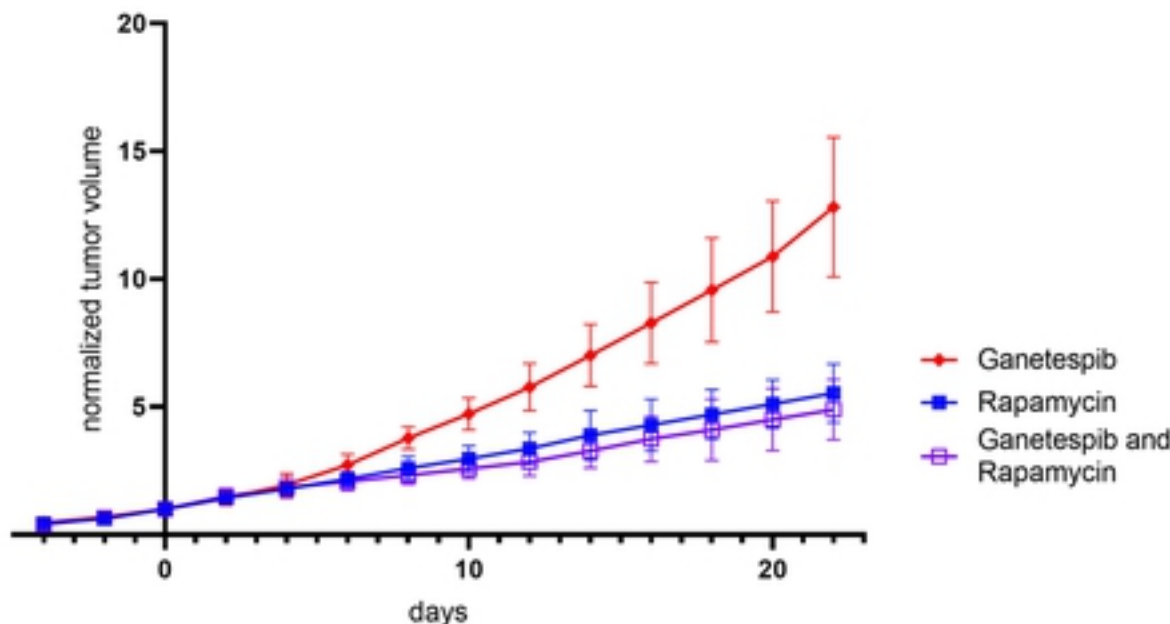

Figure 8

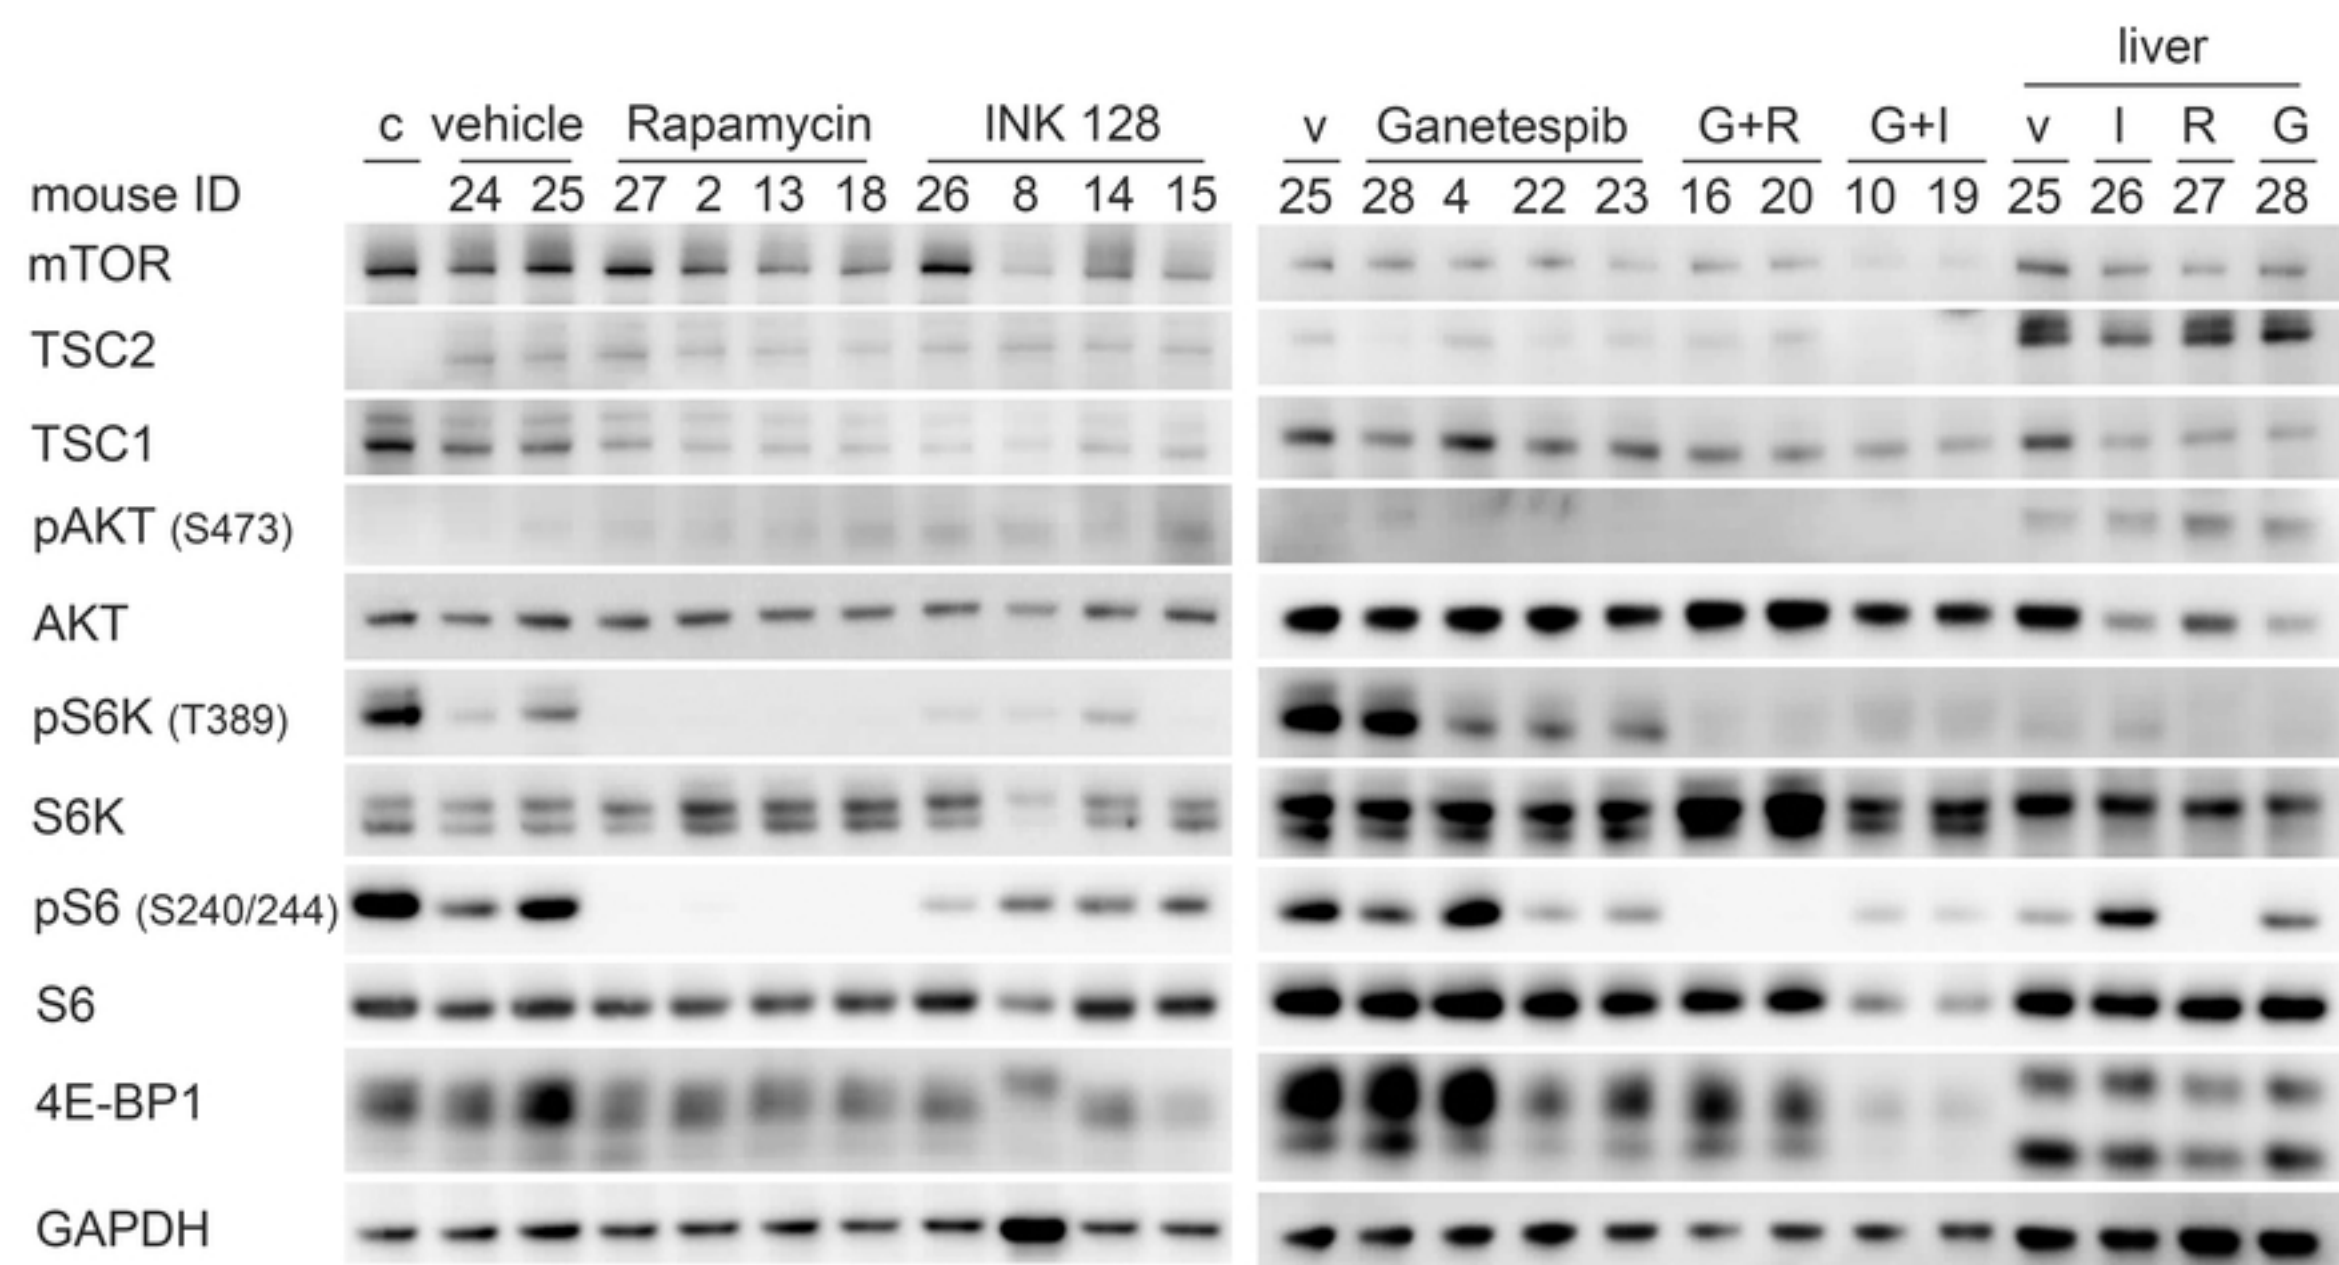

Figure 10
